# Supplementary material for: Loss of dyskerin facilitates the acquisition of metastatic traits by altering the mevalonate pathway
Source: Life Sci Alliance. 2023 Feb 2;6(4):e202201692. doi: 10.26508/lsa.202201692 (PMC9899484; doi:10.26508/lsa.202201692)
Supplement: Supplementary file 1 [file LSA-2022-01692_TableS1.xlsx]

## Sheet: SCCvsCtrl
1A.SCC.scaled	12.SCC.scaled	16.SCC.scaled	26.SCC.scaled	29.SCC.scaled	32.SCC.scaled	36.SCC.scaled	42.SCC.scaled	64.SCC.scaled	68.SCC.scaled	87.Ctrl.scaled	91.Ctrl.scaled	92.Ctrl.scaled	99.Ctrl.scaled	101.Ctrl.scaled	108.Ctrl.scaled	112.Ctrl.scaled	121.Ctrl.scaled	123.Ctrl.scaled	128.Ctrl.scaled	129.Ctrl.scaled	132.Ctrl.scaled	AffyID	ProbeSetID	ProbeSetName	Accession	TranscriptID	Seq Type	Species	Alignment	Seq Length	Sequence	Seq Source	logFC.SCCvsCtrl	P.Value.SCCvsCtrl	adj.P.Val.SCCvsCtrl	mean.SCC	mean.Ctrl	1A.SCC.RMA	12.SCC.RMA	16.SCC.RMA	26.SCC.RMA	29.SCC.RMA	32.SCC.RMA	36.SCC.RMA	42.SCC.RMA	64.SCC.RMA	68.SCC.RMA	87.Ctrl.RMA	91.Ctrl.RMA
																						MIMAT0019966_st	20519689	MIMAT0019966_st	MIMAT0019966	hsa-miR-4793-3p	miRNA	Homo sapiens	chr3:48681634-48681656 (-)	23	UCUGCACUGUGAGUUGGCUGGCU	miRBase	-1.40628	0.0114708	0.876409	2.01295	3.41923	1.67868	2.52399	1.33478	1.38249	5.49785	1.54101	1.37346	1.60501	1.52657	1.66563	3.04589	4.46413
																						MIMAT0005898_st	20506837	MIMAT0005898_st	MIMAT0005898	hsa-miR-1246	miRNA	Homo sapiens	chr2:177465752-177465770 (-)	19	AAUGGAUUUUUGGAGCAGG	miRBase	-1.35334	0.00940943	0.84124	4.96755	6.32089	2.69053	4.60494	5.86138	6.11156	5.27454	6.8008	2.85592	4.49334	4.85506	6.12742	8.4352	5.54472
																						MIMAT0000261_st	20500452	MIMAT0000261_st	MIMAT0000261	hsa-miR-183-5p	miRNA	Homo sapiens	chr7:129414807-129414828 (-)	22	UAUGGCACUGGUAGAAUUCACU	miRBase	-1.22604	0.0192643	0.998761	1.99513	3.22117	1.05268	2.60616	1.34938	1.42243	4.06093	2.13972	2.07401	1.40338	1.4881	2.35452	2.27038	1.75129
																						MIMAT0031000_st	20529783	MIMAT0031000_st	MIMAT0031000	hsa-miR-8073	miRNA	Homo sapiens	chr13:110993315-110993336 (+)	22	ACCUGGCAGCAGGGAGCGUCGU	miRBase	-1.1954	0.00786229	0.829274	4.28029	5.47569	5.74781	4.53523	4.21366	6.17803	4.73232	4.23891	1.96666	3.07856	4.44042	3.67134	5.99834	6.99415
																						MIMAT0019058_st	20518919	MIMAT0019058_st	MIMAT0019058	hsa-miR-4521	miRNA	Homo sapiens	chr17:8090266-8090287 (+)	22	GCUAAGGAAGUCCUGUGCUCAG	miRBase	-1.15547	0.0132327	0.948123	1.72948	2.88495	1.27849	1.82803	1.93645	1.24467	1.32537	1.48152	1.3022	2.10531	1.797	2.99579	3.47946	1.10089
																						MIMAT0018958_st	20518815	MIMAT0018958_st	MIMAT0018958	hsa-miR-4440	miRNA	Homo sapiens	chr2:239990525-239990546 (-)	22	UGUCGUGGGGCUUGCUGGCUUG	miRBase	-1.12054	0.02489	0.998761	2.43914	3.55968	2.07367	2.29247	2.30372	2.47079	5.55117	2.09514	2.19706	1.59354	1.83473	1.97912	3.25006	4.58837
																						MIMAT0028235_st	20526885	MIMAT0028235_st	MIMAT0028235	hsa-miR-7162-3p	miRNA	Homo sapiens	chr10:30657526-30657544 (-)	19	UCUGAGGUGGAACAGCAGC	miRBase	-1.05307	0.00254251	0.596516	2.4443	3.49736	1.44256	3.43879	1.37988	2.06702	3.08832	2.84338	2.49081	2.58902	1.88105	3.22213	2.64531	3.79916
																						MIMAT0005923_st	20506866	MIMAT0005923_st	MIMAT0005923	hsa-miR-1269a	miRNA	Homo sapiens	chr4:67142608-67142629 (+)	22	CUGGACUGAGCCGUGCUACUGG	miRBase	-1.04691	0.0383313	0.998761	1.12631	2.17322	1.24068	1.27523	1.23508	0.779386	0.819372	1.07417	1.51487	1.10584	1.00069	1.21777	1.02272	2.02152
																						ACA40_x_st	20532669	ACA40_x_st	ACA40	ACA40	HAcaBox	Homo sapiens	chr11:93468276-93468402 (-)	127	TGCACTTATGTATGTTTTTGTTTAACGTGGACAAAGACTTACAGATAGGTGCAAAAAATAAATCCTCTTTTGCAACCCAGAACTCATTGTTCAGTATGAGTTTTGATACATATAAGAAGGGATATTA	snoRNABase	-1.01584	0.017945	0.996998	5.31927	6.33511	3.04649	6.20717	4.68704	4.55203	6.02973	5.09647	7.03369	4.56359	5.19423	6.7823	4.59722	5.99416
																						MIMAT0018165_st	20518000	MIMAT0018165_st	MIMAT0018165	hsa-miR-3714	miRNA	Homo sapiens	chr3:16974688-16974709 (+)	22	GAAGGCAGCAGUGCUCCCCUGU	miRBase	-1.01334	0.0171795	0.993515	3.54389	4.55724	3.76755	3.56592	2.16304	5.57051	4.11649	3.64266	4.17352	2.57517	2.9341	2.92999	3.93971	6.12157
																						MIMAT0003251_st	20504316	MIMAT0003251_st	MIMAT0003251	hsa-miR-548a-3p	miRNA	Homo sapiens	chr6:18572075-18572096 (+) /// chr6:135560358-135560379 (+) /// chr8:105496612-105496633 (-)	22	CAAAACUGGCAAUUACUUUUGC	miRBase	-0.970524	0.0304082	0.998761	2.43289	3.40341	4.25509	1.99846	2.60629	2.86557	2.44304	1.57731	2.81468	1.98792	2.00471	1.77578	3.78913	0.894671
																						MIMAT0005911_st	20506852	MIMAT0005911_st	MIMAT0005911	hsa-miR-1260a	miRNA	Homo sapiens	chr14:77732574-77732591 (+)	18	AUCCCACCUCUGCCACCA	miRBase	-0.917852	0.0360636	0.998761	3.35866	4.27652	1.84003	4.66444	3.99029	3.06693	3.91299	3.80019	1.80648	3.62907	3.54217	3.33404	2.11428	3.06191
																						MIMAT0002819_st	20503808	MIMAT0002819_st	MIMAT0002819	hsa-miR-193b-3p	miRNA	Homo sapiens	chr16:14397874-14397895 (+)	22	AACUGGCCCUCAAAGUCCCGCU	miRBase	-0.895768	0.0134161	0.948123	7.96683	8.86259	7.5687	9.13953	7.85878	7.16897	8.44152	7.72537	7.66255	8.66223	7.07198	8.36863	8.53463	7.86681
																						U67_x_st	20538222	U67_x_st	U67	U67	HAcaBox	Homo sapiens	chr17:7481273-7481409 (+)	137	ATCCAAGGTGATTCCCTCTCCAAGGGGACATCAGTGCCTCTCAGGAAAGTAGCAGCTTGGAATAGAATCTGGCATGCCTAAGGCCTTTGGGGAACTGGGATGCTTATTTCCTCTGCCTTCCTTGGCTGCCCACATGG	snoRNABase	-0.883331	0.0113737	0.876409	3.25772	4.14105	2.82748	4.62416	2.94316	2.78014	4.15829	3.57455	1.70477	3.94114	2.36077	3.66271	4.07035	3.72567
																						ACA20_st	20532631	ACA20_st	ACA20	ACA20	HAcaBox	Homo sapiens	chr6:160201282-160201413 (-)	132	CTTCCCATTTATTTGCTGCTTGTAGTCTCACAGTGATACGAGCAGTTATACGCATGGGATAAAATAACATTGGGCCACTGTAAATTGAGATGAAGTAACCATTTTCATCTCTTCTGCAGGGACTAGACATTG	snoRNABase	-0.87969	0.00605949	0.794878	4.96426	5.84395	3.9574	5.67835	3.80594	4.24146	5.54926	4.674	6.19086	5.08959	4.74961	5.70617	5.14535	5.23212
																						SNORD123_st	20538113	SNORD123_st	SNORD123	SNORD123	CDBox	Homo sapiens	chr5:9548948-9549017 (+)	70	GGTGAAAATGATGAATTCTGGGGCGCTGATTCATGTGACTTGAAAAATGCCATCCATTTCCTGATTCACC	snoRNABase	-0.877252	0.0477062	0.99939	4.5608	5.43805	3.88536	5.38225	3.55558	4.30838	4.4412	4.34051	4.46252	4.06823	5.17538	5.98854	4.04479	3.88922
																						MIMAT0019940_st	20519663	MIMAT0019940_st	MIMAT0019940	hsa-miR-4436b-5p	miRNA	Homo sapiens	chr2:110844067-110844088 (-) /// chr2:111042442-111042463 (+)	22	GUCCACUUCUGCCUGCCCUGCC	miRBase	-0.871709	0.000475558	0.301265	2.59936	3.47107	2.17215	2.74624	1.87618	3.24978	2.87075	2.71528	1.425	2.36589	2.73665	3.8357	2.96876	3.87547
																						MIMAT0009448_st	20510800	MIMAT0009448_st	MIMAT0009448	hsa-miR-1973	miRNA	Homo sapiens	chr4:117220906-117220924 (+)	19	ACCGUGCAAAGGUAGCAUA	miRBase	-0.853977	0.0341815	0.998761	4.76875	5.62273	4.30744	3.04322	4.7053	5.90731	5.59341	5.77024	2.54357	5.44712	5.47638	4.89354	5.48552	6.14268
																						MI0022715_st	20537614	MI0022715_st	MI0022715	hsa-mir-6868	stem-loop	Homo sapiens	chr17:74094100-74094157 (-)	58	CCAGGACUGGCAGAACACUGAAGCAGCAGGCACCUGCUUCCUUCUGUUGUCUGUGCAG	miRBase	-0.850439	0.00980256	0.84124	2.54388	3.39432	3.14524	2.95941	2.1139	3.20534	2.67586	1.74422	2.46804	2.65221	2.0354	2.43918	4.39394	4.11825
																						MIMAT0022833_st	20501213	MIMAT0022833_st	MIMAT0022833	hsa-miR-365b-5p	miRNA	Homo sapiens	chr17:29902458-29902479 (+)	22	AGGGACUUUCAGGGGCAGCUGU	miRBase	-0.825149	0.0135865	0.948123	2.33441	3.15956	2.6916	2.34325	3.21549	3.05798	2.63087	2.94971	1.07122	1.66444	1.56448	2.15503	5.00883	2.86258
																						ACA20_x_st	20532632	ACA20_x_st	ACA20	ACA20	HAcaBox	Homo sapiens	chr6:160201282-160201413 (-)	132	CTTCCCATTTATTTGCTGCTTGTAGTCTCACAGTGATACGAGCAGTTATACGCATGGGATAAAATAACATTGGGCCACTGTAAATTGAGATGAAGTAACCATTTTCATCTCTTCTGCAGGGACTAGACATTG	snoRNABase	-0.790737	0.0107145	0.875141	4.95378	5.74452	4.67345	5.79519	3.35315	4.48322	5.48734	4.69941	5.46337	5.18085	4.73493	5.66691	4.81711	5.22458
																						U68_st	20538223	U68_st	U68	U68	HAcaBox	Homo sapiens	chr19:17973397-17973529 (+)	133	ATTGCACCTAAACCCAAGAATCACTGTTTCTTATAGCGGTGGTTTAAACAGAGGTGCAAACAGCAAGCGGATCTTGTCGCCTTTGGGGGGCTGTGGCCGTGCCCCTCAAAGTGAATTTGGAGGTTCCACAACT	snoRNABase	-0.780105	0.00497708	0.776085	5.66905	6.44915	5.57992	7.34702	5.31996	4.33002	6.3013	5.40348	6.12643	5.09109	5.3054	5.88583	6.16545	6.25766
																						MIMAT0000689_st	20501176	MIMAT0000689_st	MIMAT0000689	hsa-miR-99b-5p	miRNA	Homo sapiens	chr19:52195871-52195892 (+)	22	CACCCGUAGAACCGACCUUGCG	miRBase	-0.780045	0.0157658	0.974499	8.34399	9.12403	8.84015	10.1104	7.6497	6.45575	8.65452	8.406	7.76465	8.62239	8.36942	8.56683	8.32065	9.6505
																						ACA9_st	20532722	ACA9_st	ACA9	ACA9	HAcaBox	Homo sapiens	chr7:45024977-45025109 (-)	133	TAGCAAGCCTCCAGCGTGCTTGGGTCTGCGGTGACCCTATGCATTCCTTCAGTGCTTGCTAGAACAGTTTTGAAACGGTTTGAGGCCTTGCCCTGCTCCATCCAGAGCAAGGTTATAGAAATTTCAGACAATG	snoRNABase	-0.758147	0.0140954	0.948123	4.8164	5.57454	3.18847	5.67705	4.46248	4.03031	5.67045	4.62573	5.76554	4.39343	4.61753	5.73296	5.09197	5.71165
																						ACA5_st	20532699	ACA5_st	ACA5	ACA5	HAcaBox	Homo sapiens	chr7:45143948-45144081 (-)	134	TGCAGCCGTGTCAAATTCAGTACCTGTCCTATGCATGGTAGGCACTGGCCCAGAAGGCTGCCACAGAAACACTGTGACTCATGGGCCCTGTTCCTGTGTCCCAGGCTCAGGGATAAATTTGGTTACAGACATCA	snoRNABase	-0.751262	0.00334543	0.637584	2.77281	3.52408	1.88021	3.61923	2.23072	2.18249	3.98605	2.82537	2.51283	2.67531	2.46744	3.34849	3.05093	4.08338
																						MIMAT0003249_st	20504312	MIMAT0003249_st	MIMAT0003249	hsa-miR-584-5p	miRNA	Homo sapiens	chr5:148441936-148441957 (-)	22	UUAUGGUUUGCCUGGGACUGAG	miRBase	-0.749017	0.040583	0.998761	1.81205	2.56106	1.49726	1.50586	1.9019	1.55036	2.32117	2.03822	1.80919	1.65881	1.98289	1.85481	1.70246	2.63753
																						U46_st	20538188	U46_st	U46	U46	CDBox	Homo sapiens	chr1:45242164-45242261 (+)	98	GTAGGGTGATGAAAAAGAATCCTTAGGCGTGGTTGTGGCCGTCTTGGTCACCTGTGTGCCACTTGCCAATGCAAGGACTTGTCATAGTTACACTGACT	snoRNABase	-0.746408	0.0150802	0.960249	4.82173	5.56813	4.15525	6.13836	4.42131	4.49853	5.67801	3.7748	3.58257	4.51287	5.40734	6.04822	5.47507	4.80787
																						MIMAT0005797_st	20504572	MIMAT0005797_st	MIMAT0005797	hsa-miR-1301-3p	miRNA	Homo sapiens	chr2:25551520-25551543 (-)	24	UUGCAGCUGCCUGGGAGUGACUUC	miRBase	-0.742288	0.0359894	0.998761	3.41537	4.15766	2.82831	4.24908	2.96517	2.68896	4.6055	4.09269	1.8099	3.6824	3.23255	3.99916	4.29703	4.48147
																						MIMAT0002176_st	20503104	MIMAT0002176_st	MIMAT0002176	hsa-miR-485-3p	miRNA	Homo sapiens	chr14:101521801-101521822 (+)	22	GUCAUACACGGCUCUCCUCUCU	miRBase	-0.737735	0.00109746	0.396298	1.52871	2.26644	2.3894	1.63911	1.49999	1.6735	1.74462	1.09722	0.971834	1.47354	1.38594	1.41193	1.93881	1.39323
																						MIMAT0027574_st	20525635	MIMAT0027574_st	MIMAT0027574	hsa-miR-6836-5p	miRNA	Homo sapiens	chr7:2297186-2297207 (-)	22	CGCAGGGCCCUGGCGCAGGCAU	miRBase	-0.736349	0.0172319	0.993515	2.98288	3.71923	2.15681	2.40815	2.2311	3.06102	3.92871	3.16357	2.63561	3.6037	3.43717	3.20295	2.93915	4.11928
																						U17b_st	20538140	U17b_st	U17b	U17b	HAcaBox	Homo sapiens	chr1:28835070-28835274 (+)	205	TCCAACGTGGATACCCTGGGAGGTCACTCTCCCCAGGCTCTGTCCAAGTGGCATAGGGGAGCTTAGGGCTCTGCCCCATGATGTACAGTCCCTTTCCACAACGTTGAAGATGAAGCTGGGCCTCGTGTCTGCGCCTGCATATTCCTACAGCTTCCCAGAGTCCTGTGGACAATGACTGGGGAGACAAACCATGCAGGAAACATAT	snoRNABase	-0.728717	0.00119116	0.408628	8.70302	9.43174	8.38547	9.03891	8.2405	8.4578	8.87517	8.02085	10.0183	8.35753	8.41182	9.22392	9.66181	9.23179
																						ENSG00000200879_st	20532818	ENSG00000200879_st	ENSG00000200879	ENSG00000200879	snoRNA	Homo sapiens	chr11:122928785-122928869 (-)	85	TCACAATGATGAATGGTCCAAAACATTCGCGGTTTCCACCAGAATTCAAGGTGTTGGCAACTACCTTCCTTGGATGTCTGAGTGA	Ensembl	-0.724979	0.0023986	0.587742	5.09841	5.82339	4.97223	5.15741	5.14291	4.62527	6.04503	5.28907	3.75995	5.21182	4.95257	5.82785	5.12081	5.47448
																						MI0000089_st	20534379	MI0000089_st	MI0000089	hsa-mir-31	stem-loop	Homo sapiens	chr9:21512114-21512184 (-)	71	GGAGAGGAGGCAAGAUGCUGGCAUAGCUGUUGAACUGGGAACCUGCUAUGCCAACAUAUUGCCAUCUUUCC	miRBase	-0.724012	0.0431861	0.99939	2.84629	3.5703	2.49806	3.86423	4.36763	3.22665	1.99329	3.08493	2.02254	3.11363	2.08732	2.2046	3.30745	3.86187
																						U68_x_st	20538224	U68_x_st	U68	U68	HAcaBox	Homo sapiens	chr19:17973397-17973529 (+)	133	ATTGCACCTAAACCCAAGAATCACTGTTTCTTATAGCGGTGGTTTAAACAGAGGTGCAAACAGCAAGCGGATCTTGTCGCCTTTGGGGGGCTGTGGCCGTGCCCCTCAAAGTGAATTTGGAGGTTCCACAACT	snoRNABase	-0.699604	0.0136113	0.948123	5.7284	6.428	5.0723	7.31905	5.50687	4.62471	6.45833	5.48189	6.14987	4.81841	5.42943	6.42311	6.25246	6.19251
																						U58A_x_st	20538208	U58A_x_st	U58A	U58A	CDBox	Homo sapiens	chr18:47017653-47017717 (-)	65	CTGCAGTGATGACTTTCTTAGGACACCTTTGGATTTACCGTGAAAATTAATAAATTCTGAGCAGC	snoRNABase	-0.696412	0.00217037	0.587742	3.97523	4.67164	3.97023	4.71982	3.25833	3.20934	4.69132	3.54246	4.87671	3.47072	4.06829	3.94505	3.96916	4.19433
																						MIMAT0004976_st	20506002	MIMAT0004976_st	MIMAT0004976	hsa-miR-933	miRNA	Homo sapiens	chr2:176032370-176032391 (-)	22	UGUGCGCAGGGAGACCUCUCCC	miRBase	-0.696336	0.043906	0.99939	4.30655	5.00288	3.37846	4.61758	4.45405	4.8516	4.57018	5.24923	1.86608	5.06844	3.92925	5.08063	4.74467	5.17328
																						MIMAT0027409_st	20525470	MIMAT0027409_st	MIMAT0027409	hsa-miR-6754-3p	miRNA	Homo sapiens	chr11:71184592-71184613 (+)	22	UCUUCACCUGCCUCUGCCUGCA	miRBase	-0.693843	0.00328138	0.637584	1.74924	2.44308	1.23352	1.94283	1.24967	1.51469	2.83061	2.12066	1.16204	1.78682	1.87759	1.77397	2.30558	3.71156
																						Z17B_st	20538282	Z17B_st	Z17B	Z17B	CDBox	Homo sapiens	chr17:27050699-27050772 (+)	74	GGGTGCAAATGATGCATATGTTAGCGACCAAAGCCTGATCTTTGCTGATTAGTCATAATTAACTGACTGCACCC	snoRNABase	-0.692338	0.000746035	0.319909	4.72722	5.41956	4.75306	5.38012	4.45119	4.25363	5.1614	4.36048	4.30702	4.89122	4.51878	5.19532	5.194	5.39759
																						ACA42_st	20532672	ACA42_st	ACA42	ACA42	HAcaBox	Homo sapiens	chr1:155889700-155889833 (-)	134	TGGTAATGGATTTATGGTGGGTCCTTCTCTGTGGGCCTCTCATAGTGTACCCATGCCATAGCAAATGGCAGCCTCGAACCATTGCCCAGTCCCCTTACCTGTGGGCTGTGAGCACTGAAGGGGGTTGCACAGTG	snoRNABase	-0.682701	0.00272818	0.603807	4.52108	5.20378	3.93652	5.4039	4.12669	4.12311	5.10788	4.60572	3.67334	4.59794	4.36001	5.27572	4.85667	5.64703
																						ENSG00000239080_st	20533711	ENSG00000239080_st	ENSG00000239080	ENSG00000239080	snoRNA	Homo sapiens	chrX:135216476-135216579 (-)	104	ATCTTTTTGTAGTTCATGAGCATGAAGATTGGGTGTTCATGCACATGTGTGAGATGTGCCACCCTTGAACCTTGTTATGACGTTGGCATCTTACCCATCTGGCC	Ensembl	-0.676823	0.0464548	0.99939	3.26298	3.9398	2.77213	4.00002	2.54738	3.04374	2.65132	3.36756	5.51864	2.2258	3.48399	3.01921	3.86487	2.82712
																						U46_x_st	20538189	U46_x_st	U46	U46	CDBox	Homo sapiens	chr1:45242164-45242261 (+)	98	GTAGGGTGATGAAAAAGAATCCTTAGGCGTGGTTGTGGCCGTCTTGGTCACCTGTGTGCCACTTGCCAATGCAAGGACTTGTCATAGTTACACTGACT	snoRNABase	-0.675644	0.0228024	0.998761	4.95791	5.63355	4.20564	6.19611	4.38161	4.63706	5.73373	4.22587	3.68568	4.76758	5.5273	6.2185	5.57419	4.95802
																						ACA10_s_st	20532617	ACA10_s_st	ACA10	ACA10	HAcaBox	Homo sapiens	chr16:2012335-2012467 (-)	133	GGTCTCTCAGCTCCGCTTAACCACACGGGTCCAGTGTGTGCTTGGCGTGTTTTCAGGGAGGCAGAGAAAGGCTCTCCTAATGCACGACAGACCCGCCCAGAATGGCCTCTCTGTTCCTAGGAGTGCGACAATT	snoRNABase	-0.675316	0.0269597	0.998761	4.29788	4.9732	2.80441	5.34089	4.01479	3.37637	5.04969	4.37766	4.31723	4.67738	4.22534	4.79509	4.86767	3.40298
																						ENSG00000207187_s_st	20532999	ENSG00000207187_s_st	ENSG00000207187	ENSG00000207187	snoRNA	Homo sapiens	chr2:30410300-30410432 (+)	133	GGTCTCTCAGCTCTGCTTAACCACACGGGTCCAGTGTGTGCTTGGCGTGTTTTCAGGGAGGCAGAGAAAGGCTCTCCTAATGCACGACAGACCCGCCCAGAATGGCCTCTCTGTTCCTAGGAGTGTGACAATT	Ensembl	-0.675316	0.0269597	0.998761	4.29788	4.9732	2.80441	5.34089	4.01479	3.37637	5.04969	4.37766	4.31723	4.67738	4.22534	4.79509	4.86767	3.40298
																						ACA3-2_x_st	20532648	ACA3-2_x_st	ACA3-2	ACA3-2	HAcaBox	Homo sapiens	chr11:8706986-8707116 (+)	131	GCCGAGACTAGAGTCACATCCTGACACAACTCTTGTCCTGGTGTGCTAGAGTACTCGAAGAGAATCTACTGGTCTTGATTCACTGGTGGGGGCAGTCGGTGCCCCCGTTAGTGCCCAGATCAGAAACATAC	snoRNABase	-0.674375	0.031959	0.998761	6.08359	6.75797	4.85295	6.80946	4.91698	4.99069	6.93144	5.62802	6.84465	6.11164	6.76636	6.98373	5.51239	6.25958
																						U64_st	20538219	U64_st	U64	U64	HAcaBox	Homo sapiens	chr16:2012974-2013107 (-)	134	ACTCTCTCGGCTCTGCATAGTTGCACTTGGCTTCACCCGTGTGACTTTCGTAACGGGGAGAGAGAGAAAAGATCTCCTCAGGACCTCGGATGGGCCTTACTGTGGCCTCTCTTTCCTTGAGGGGTGCAACAGGC	snoRNABase	-0.665522	0.00127918	0.416361	4.08855	4.75407	4.01833	4.93675	3.95489	3.48796	4.3368	3.97106	4.14876	4.28233	3.56836	4.18027	4.50564	3.58787
																						ACA15_s_st	20532624	ACA15_s_st	ACA15	ACA15	HAcaBox	Homo sapiens	chr7:56128163-56128295 (+)	133	GCATGGCCGAATACTGTGTTTTTATCAGTAGTTTACACAGCCAGACACCATGCAAAAGCAGTCTTCCCTTTAGAATGACTGATGGTATGCTAAGGTTTTTCATAGCATATCATTATTAAAGGTGAATACAAAT	snoRNABase	-0.664694	0.0204784	0.998761	5.64399	6.30869	5.27531	6.52099	4.53596	4.58393	6.25151	5.32352	7.13437	5.17691	5.44675	6.19069	5.68872	5.908
																						ENSG00000206785_s_st	20532953	ENSG00000206785_s_st	ENSG00000206785	ENSG00000206785	snoRNA	Homo sapiens	chr7:65225039-65225173 (+)	135	GCATGGCTGAATACTGTGTTCTTTTATCAGTAGTTTACACAGCCAGACACCATGCAAAAGCAGTCTTCCCTTTAGAATGACTGATGGTATGCTAAGGTTTTTCATAGCATATCATTATTAAAGGTGAATACAAAT	Ensembl	-0.664694	0.0204784	0.998761	5.64399	6.30869	5.27531	6.52099	4.53596	4.58393	6.25151	5.32352	7.13437	5.17691	5.44675	6.19069	5.68872	5.908
																						ENSG00000207062_s_st	20532982	ENSG00000207062_s_st	ENSG00000207062	ENSG00000207062	snoRNA	Homo sapiens	chr7:64530916-64531050 (+)	135	GCATGGCTGAATACTGTGTTCTTTTATCAGTAGTTTACACAGCCAGACACCATGCAAAAGCAGTCTTCCCTTTAGAATGACTGATGGTATGCTAAGGTTTTTCATAGCATATCATTATTAAAGGTGAATACAAAT	Ensembl	-0.664694	0.0204784	0.998761	5.64399	6.30869	5.27531	6.52099	4.53596	4.58393	6.25151	5.32352	7.13437	5.17691	5.44675	6.19069	5.68872	5.908
																						MIMAT0000280_st	20500488	MIMAT0000280_st	MIMAT0000280	hsa-miR-223-3p	miRNA	Homo sapiens	chrX:65238779-65238800 (+)	22	UGUCAGUUUGUCAAAUACCCCA	miRBase	-0.664179	0.0244618	0.998761	1.60329	2.26747	1.2465	1.30738	1.79319	1.5144	1.74884	1.9347	1.84869	2.04117	1.17836	1.41963	2.99294	1.34251
																						ACA24_x_st	20532637	ACA24_x_st	ACA24	ACA24	HAcaBox	Homo sapiens	chr4:119200345-119200475 (+)	131	CTCCATGTATCTTTGGGACCTGTCAGCCGTGGCAGTCTCCCTTCCTAGCCATGGAAGAGCATATCCTTGTTTATTGGCAAAGCTGTCACCATTTAATTGGTATCAGATTCTGACTTGCACAAGTAACATTC	snoRNABase	-0.657738	0.00147842	0.441019	3.13567	3.79341	3.31314	3.57355	3.02665	3.57679	2.91743	3.1079	3.15372	2.62518	2.78507	3.27726	3.57346	2.80911
																						ENSG00000263358_s_st	20534128	ENSG00000263358_s_st	ENSG00000263358	ENSG00000263358	snoRNA	Homo sapiens	chrHSCHR6_MHC_SSTO:31494098-31494173 (-)	76	GCCAAATGATGTTTATTTGAAACAGGAGCACCTCAGTGCAAGGACGACTCTTATCTATCACCCATGACTGATGGCT	Ensembl	-0.656899	0.000658646	0.301265	7.09947	7.75637	6.92468	7.42945	7.22255	6.27442	7.28967	6.74067	6.3193	7.57362	7.27116	7.94917	7.25695	7.76445
																						ENSG00000263359_s_st	20534129	ENSG00000263359_s_st	ENSG00000263359	ENSG00000263359	snoRNA	Homo sapiens	chrHSCHR6_MHC_COX:31491609-31491684 (-)	76	GCCAAATGATGTTTATTTGAAACAGGAGCACCTCAGTGCAAGGACGACTCTTATCTATCACCCATGACTGATGGCT	Ensembl	-0.656899	0.000658646	0.301265	7.09947	7.75637	6.92468	7.42945	7.22255	6.27442	7.28967	6.74067	6.3193	7.57362	7.27116	7.94917	7.25695	7.76445
																						ENSG00000263625_s_st	20534136	ENSG00000263625_s_st	ENSG00000263625	ENSG00000263625	snoRNA	Homo sapiens	chrHSCHR6_MHC_MCF:31580504-31580579 (-)	76	GCCAAATGATGTTTATTTGAAACAGGAGCACCTCAGTGCAAGGACGACTCTTATCTATCACCCATGACTGATGGCT	Ensembl	-0.656899	0.000658646	0.301265	7.09947	7.75637	6.92468	7.42945	7.22255	6.27442	7.28967	6.74067	6.3193	7.57362	7.27116	7.94917	7.25695	7.76445
																						ENSG00000265116_s_st	20534155	ENSG00000265116_s_st	ENSG00000265116	ENSG00000265116	snoRNA	Homo sapiens	chrHSCHR6_MHC_MANN:31543668-31543743 (-)	76	GCCAAATGATGTTTATTTGAAACAGGAGCACCTCAGTGCAAGGACGACTCTTATCTATCACCCATGACTGATGGCT	Ensembl	-0.656899	0.000658646	0.301265	7.09947	7.75637	6.92468	7.42945	7.22255	6.27442	7.28967	6.74067	6.3193	7.57362	7.27116	7.94917	7.25695	7.76445
																						ENSG00000265849_s_st	20534174	ENSG00000265849_s_st	ENSG00000265849	ENSG00000265849	snoRNA	Homo sapiens	chrHSCHR6_MHC_APD:31515442-31515517 (-)	76	GCCAAATGATGTTTATTTGAAACAGGAGCACCTCAGTGCAAGGACGACTCTTATCTATCACCCATGACTGATGGCT	Ensembl	-0.656899	0.000658646	0.301265	7.09947	7.75637	6.92468	7.42945	7.22255	6.27442	7.28967	6.74067	6.3193	7.57362	7.27116	7.94917	7.25695	7.76445
																						ENSG00000266295_s_st	20534180	ENSG00000266295_s_st	ENSG00000266295	ENSG00000266295	snoRNA	Homo sapiens	chrHSCHR6_MHC_QBL:31494434-31494509 (-)	76	GCCAAATGATGTTTATTTGAAACAGGAGCACCTCAGTGCAAGGACGACTCTTATCTATCACCCATGACTGATGGCT	Ensembl	-0.656899	0.000658646	0.301265	7.09947	7.75637	6.92468	7.42945	7.22255	6.27442	7.28967	6.74067	6.3193	7.57362	7.27116	7.94917	7.25695	7.76445
																						ENSG00000266419_s_st	20534182	ENSG00000266419_s_st	ENSG00000266419	ENSG00000266419	snoRNA	Homo sapiens	chrHSCHR6_MHC_DBB:31486334-31486409 (-)	76	GCCAAATGATGTTTATTTGAAACAGGAGCACCTCAGTGCAAGGACGACTCTTATCTATCACCCATGACTGATGGCT	Ensembl	-0.656899	0.000658646	0.301265	7.09947	7.75637	6.92468	7.42945	7.22255	6.27442	7.28967	6.74067	6.3193	7.57362	7.27116	7.94917	7.25695	7.76445
																						U83_s_st	20538260	U83_s_st	U83	U83	CDBox	Homo sapiens	chr6:31504151-31504226 (-)	76	GCCAAATGATGTTTATTTGAAACAGGAGCACCTCAGTGCAAGGACGACTCTTATCTATCACCCATGACTGATGGCT	snoRNABase	-0.656899	0.000658646	0.301265	7.09947	7.75637	6.92468	7.42945	7.22255	6.27442	7.28967	6.74067	6.3193	7.57362	7.27116	7.94917	7.25695	7.76445
																						ACA5_x_st	20532700	ACA5_x_st	ACA5	ACA5	HAcaBox	Homo sapiens	chr7:45143948-45144081 (-)	134	TGCAGCCGTGTCAAATTCAGTACCTGTCCTATGCATGGTAGGCACTGGCCCAGAAGGCTGCCACAGAAACACTGTGACTCATGGGCCCTGTTCCTGTGTCCCAGGCTCAGGGATAAATTTGGTTACAGACATCA	snoRNABase	-0.648701	0.00229329	0.587742	2.8601	3.5088	2.30712	3.73963	2.58619	2.39938	3.74857	2.97197	2.22658	2.72865	2.80127	3.09162	3.064	4.16125
																						U43_st	20538180	U43_st	U43	U43	CDBox	Homo sapiens	chr22:39715057-39715118 (-)	62	CACAGATGATGAACTTATTGACGGGCGGACAGAAACTGTGTGCTGATTGTCACGTTCTGATT	snoRNABase	-0.643674	0.000281288	0.301265	10.2264	10.8701	10.1989	10.3844	9.76092	9.76345	10.5311	10.1215	10.3723	10.0492	10.1449	10.9376	10.2781	10.2342
																						MIMAT0019849_st	20519570	MIMAT0019849_st	MIMAT0019849	hsa-miR-4728-5p	miRNA	Homo sapiens	chr17:37882749-37882771 (+)	23	UGGGAGGGGAGAGGCAGCAAGCA	miRBase	-0.636552	0.0384758	0.998761	6.98189	7.61844	7.71783	7.03047	6.28992	8.3246	7.00837	6.96654	6.64938	6.71965	6.47727	6.63486	8.07823	8.78355
																						U19_st	20538146	U19_st	U19	U19	HAcaBox	Homo sapiens	chr5:138614469-138614668 (+)	200	ATCCAGCGGTTGTCAGCTATCCAGGCTCATGTGGTGCCTGTGATGGTGTTACACTGTTGGAAGAGCAAACACTGTCTTTATTGAGGTTTGGCTCCAAGCACTGTTTTGGTGTTGTAGCTGAGTACCTTTGGGCAGTGTTTTGCACCTCTGAGAGTGGAATGACTCCTGTGGAGTTGATCCTAGTCTGGGTGCAAACAATT	snoRNABase	-0.624813	0.0139415	0.948123	4.09025	4.71506	3.68914	4.91874	3.4301	4.07436	3.98949	3.84633	3.45471	4.88482	3.87255	4.74222	4.23877	4.48941
																						MIMAT0027645_st	20525706	MIMAT0027645_st	MIMAT0027645	hsa-miR-6872-3p	miRNA	Homo sapiens	chr3:50310706-50310726 (+)	21	CCCAUGCCUCCUGCCGCGGUC	miRBase	-0.624143	0.0246338	0.998761	1.78727	2.41141	1.68589	2.34654	1.38184	1.52847	2.36411	1.83269	1.55805	1.53656	1.27523	2.36327	2.04251	3.22039
																						ACA18_x_st	20532628	ACA18_x_st	ACA18	ACA18	HAcaBox	Homo sapiens	chr11:93466632-93466763 (-)	132	GTTGAGGTCTATCCCGATGGGGCTTTTCCTGTAGCCTGCACATCGTTGGAAACGCCTCATAGAGTAACTCTGTGGTTTTACTTTACTCACAGGACTATTGTTAGATCTGTGGGAAGGAATTACAAGACAGTT	snoRNABase	-0.622573	0.00260829	0.596516	7.40976	8.03233	7.09247	8.22489	7.54696	6.72764	7.67159	7.12547	7.5464	6.90568	6.86272	8.39377	7.37388	8.12463
																						U50B_st	20538197	U50B_st	U50B	U50B	CDBox	Homo sapiens	chr6:86387307-86387377 (-)	71	TAATCAATGATGAAACCTATCCCGAAGCTGATAACCTGAAGAAAAATAAGTACGGATTCGGCTTCTGAGAT	snoRNABase	-0.618123	0.0191077	0.998761	6.25497	6.8731	6.01037	6.03294	6.30224	5.23396	6.81661	6.20791	7.09585	5.82148	6.5727	6.45567	6.2957	6.80265
																						MIMAT0015041_st	20515591	MIMAT0015041_st	MIMAT0015041	hsa-miR-1260b	miRNA	Homo sapiens	chr11:96074611-96074629 (+)	19	AUCCCACCACUGCCACCAU	miRBase	-0.61812	0.0384672	0.998761	7.49063	8.10875	7.05366	7.96079	8.60659	6.80631	7.75268	7.54933	6.72262	7.75886	6.92378	7.77166	6.97655	7.18737
																						MIMAT0018185_st	20518432	MIMAT0018185_st	MIMAT0018185	hsa-miR-3911	miRNA	Homo sapiens	chr9:130453042-130453063 (-)	22	UGUGUGGAUCCUGGAGGAGGCA	miRBase	-0.613126	0.0369163	0.998761	2.81563	3.42875	1.87136	2.6187	1.41473	3.56258	2.33575	3.54261	1.9869	3.36282	4.06623	3.39459	3.59951	3.08607
																						MI0022642_st	20537540	MI0022642_st	MI0022642	hsa-mir-6797	stem-loop	Homo sapiens	chr19:42373697-42373768 (+)	72	CAGCCAGGAGGGAAGGGGCUGAGAACAGGACCUGUGCUCACUGGGGCCUGCAUGACCCUUCCCUCCCCACAG	miRBase	-0.612564	0.00678021	0.794878	2.89322	3.50579	4.11306	3.45899	2.94584	3.3105	3.0108	2.57618	2.28612	2.618	2.54188	2.07087	3.96239	2.98091
																						ACA2a_st	20532643	ACA2a_st	ACA2a	ACA2a	HAcaBox	Homo sapiens	chr12:49050431-49050565 (-)	135	TAGGCCCTGAATCAAGACCAATGGTTTGCTGTAGCTGTTGGTTTCAAACAGGAGCTAAGAGTGATGTCTTCCTTGTGGTCTGTTGGCTATTCAGTATTCCAGTGCGAATTGCCAATTCAGTTGGAAGAAACATAG	snoRNABase	-0.610278	0.00294657	0.612618	2.95654	3.56682	2.50401	3.35606	2.59376	2.69415	3.75549	2.78295	2.508	2.55795	2.96807	3.84498	3.88311	4.23142
																						ACA21_st	20532633	ACA21_st	ACA21	ACA21	HAcaBox	Homo sapiens	chr17:37009116-37009248 (-)	133	CCCCCTTTTAAAAGCACTCAATGGGCCTGTGGCTAATGACCTATTGAGCCGTCAAGAAAGGGGAGAGTGAAAACATCGCTTTTGGGTGAAGTGGCAACATGTGTTGTTTGCTTCAATCGGTGGTGTGACAAGG	snoRNABase	-0.607729	0.000647896	0.301265	5.33028	5.93801	5.17708	5.5312	5.21835	4.77102	5.739	5.69529	5.04552	5.40974	4.64966	6.06594	5.69643	6.23069
																						ACA24_s_st	20532636	ACA24_s_st	ACA24	ACA24	HAcaBox	Homo sapiens	chr4:119200345-119200475 (+)	131	CTCCATGTATCTTTGGGACCTGTCAGCCGTGGCAGTCTCCCTTCCTAGCCATGGAAGAGCATATCCTTGTTTATTGGCAAAGCTGTCACCATTTAATTGGTATCAGATTCTGACTTGCACAAGTAACATTC	snoRNABase	-0.602556	0.0346909	0.998761	7.00663	7.60919	5.25153	7.4829	7.72145	6.22286	6.87975	7.12621	7.46215	7.29816	6.78769	7.83361	6.62892	7.88467
																						ENSG00000206903_s_st	20532964	ENSG00000206903_s_st	ENSG00000206903	ENSG00000206903	snoRNA	Homo sapiens	chr15:65577799-65577929 (-)	131	CTCCATGTATCTTTGGGACCTGTCAAGTGTGGCAGTCTCCCTTCCTTGCCATGGAAGAGCATATTCTTGTTTACCAGCAAAGCTGTCACCATTTAATTGGTATCAGATTCTGACTTGCACAAGTAACATTC	Ensembl	-0.602556	0.0346909	0.998761	7.00663	7.60919	5.25153	7.4829	7.72145	6.22286	6.87975	7.12621	7.46215	7.29816	6.78769	7.83361	6.62892	7.88467
																						ENSG00000207130_s_st	20532993	ENSG00000207130_s_st	ENSG00000207130	ENSG00000207130	snoRNA	Homo sapiens	chr3:128433414-128433548 (-)	135	CTCCATGTGTCTTTGGAACCTGTCAGCTGTGGCAGTTGCCCTTCCTAGCCATGGAAGAGTAAGTATATTCTTGTTTATTGGCAAAGCTGTCACCATTTCATTGGTATCAGATTCTGACTTGCACAAGTAACATTC	Ensembl	-0.602556	0.0346909	0.998761	7.00663	7.60919	5.25153	7.4829	7.72145	6.22286	6.87975	7.12621	7.46215	7.29816	6.78769	7.83361	6.62892	7.88467
																						MI0002468_st	20535133	MI0002468_st	MI0002468	hsa-mir-484	stem-loop	Homo sapiens	chr16:15737151-15737229 (+)	79	AGCCUCGUCAGGCUCAGUCCCCUCCCGAUAAACCCCUAAAUAGGGACUUUCCCGGGGGGUGACCCUGGCUUUUUUGGCG	miRBase	-0.595434	0.0487167	0.99939	2.43254	3.02798	1.39536	3.66355	2.15135	1.83475	3.01688	2.6641	1.82218	2.80407	3.06452	1.90867	1.74623	3.37861
																						MIMAT0016916_st	20517745	MIMAT0016916_st	MIMAT0016916	hsa-miR-4286	miRNA	Homo sapiens	chr8:10524498-10524514 (+)	17	ACCCCACUCCUGGUACC	miRBase	-0.591569	0.0155422	0.974499	8.0844	8.67597	7.95321	8.52505	9.25419	7.25733	8.72788	7.76071	7.85988	8.13445	7.40372	7.96761	8.34468	7.77135
																						U66_st	20538221	U66_st	U66	U66	HAcaBox	Homo sapiens	chr1:93306276-93306408 (+)	133	GTGCAAACTCGATCACTAGCTCTGCGTGATGTGGCAGAAGCGAAGGGAACCAGGTTTGCAAAAGTAACTGTGGTGATGGAAATGTGTTAGCCTCAGACACTACTGAGGTGGTTCTTTCTATCCTAGTACAGTC	snoRNABase	-0.585937	0.0160702	0.982833	4.23711	4.82305	3.17018	5.14531	3.96022	3.49024	5.20879	3.56356	3.97723	4.76058	4.24725	4.84773	4.55765	4.85241
																						U43_x_st	20538181	U43_x_st	U43	U43	CDBox	Homo sapiens	chr22:39715057-39715118 (-)	62	CACAGATGATGAACTTATTGACGGGCGGACAGAAACTGTGTGCTGATTGTCACGTTCTGATT	snoRNABase	-0.585013	0.000396713	0.301265	10.0801	10.6652	10.0487	10.2105	9.66465	9.62746	10.3521	9.97978	10.1719	9.92613	10.0408	10.7794	10.0736	10.1103
																						ENSG00000222489_st	20533181	ENSG00000222489_st	ENSG00000222489	ENSG00000222489	snoRNA	Homo sapiens	chr14:20791338-20791485 (-)	148	TGATGGCTGTTCCTCTCACTGCTTGAAGCCTTAGGCAGTGGGATTTTGATCCATCATATATCAAAAATGGCTTATCTTCACTCAGGGCACCATGAGGATGGGCTGGCTGTCCGTTAGTGCCTTCTGATTTTTGCGGAGTCAAACAATT	Ensembl	-0.576088	0.00615579	0.794878	3.4788	4.05488	3.52808	4.19045	3.17566	2.8962	4.15352	3.60907	2.6316	3.30059	3.49932	3.80345	3.30497	4.41488
																						ACA50_st	20532687	ACA50_st	ACA50	ACA50	HAcaBox	Homo sapiens	chr16:58593700-58593835 (-)	136	AAGCACTGCCTTTGAACCTGATGTGTCTTGTTTGTAGCTTCACGGGCCAAGCAACAGTGCTAGAGCATAACGACTTGTTATAACTGGGGCTCTTCAGCTCTCAACTGAACTGCTCTTTTAAAAACAAGGTACATTT	snoRNABase	-0.572846	0.000148735	0.301265	3.03796	3.6108	3.06965	3.31876	2.74762	3.06622	3.19943	3.21502	2.64943	2.85923	2.67454	3.57968	3.43302	3.52389
																						ACA4_st	20532686	ACA4_st	ACA4	ACA4	HAcaBox	Homo sapiens	chr3:186505402-186505538 (+)	137	TACCAAAAGTTAGCTTTTTGGGGGGCAGGTTTTTAAGTAACCTTTGCCAACTTGGGCTATTTGGAAGAGTAAAAGACCACACTCCACAGTGGGCTATACCACTTAGTATAGTTCGCTACTATTTTGTGGCCTACATG	snoRNABase	-0.572145	0.000959299	0.365653	4.02029	4.59244	3.73843	4.52466	3.7032	3.72225	4.44869	3.80378	4.10166	4.03945	3.62009	4.50068	4.71263	4.59496
																						U60_st	20538214	U60_st	U60	U60	CDBox	Homo sapiens	chr16:2205024-2205106 (-)	83	AGTCTGTGATGAATTGCTTTGACTTCTGACACCTCGTATGAAAACTGCACGTGCAGTCTGATTATTTAGCAAGACTGAGGCTT	snoRNABase	-0.570969	0.00692715	0.794878	2.74236	3.31333	2.17242	3.04362	3.29065	2.32009	2.80702	2.93532	1.96275	3.13773	2.73922	3.01484	2.97161	2.42234
																						ACA34_st	20532656	ACA34_st	ACA34	ACA34	HAcaBox	Homo sapiens	chr12:49048165-49048301 (-)	137	GTGGCCCTGACTGAAGACCAGCAGTTGTACTGTGGCTGTTGGTTTCAAGCAGAGGCCTAAAGGACTGTCTTCCTGTGGTCTGTTGGCTGTTCTGGGACCTCAGTAGGGAATGGCTATTTCATTTGGAAGAAACAACC	snoRNABase	-0.561779	0.00621431	0.794878	4.82738	5.38916	4.85519	5.75839	4.67258	4.24264	5.94422	4.0977	4.50485	4.825	4.52414	4.8491	5.19269	5.6689
																						ACA47_st	20532681	ACA47_st	ACA47	ACA47	scaRna	Homo sapiens	chr17:75085389-75085575 (+)	187	ACGGTCTGGGGAAAGGCTCCTGTGTTGTTGAGCCTGCCAAGTTGTGGGTGCAGCATGGTACCAGGCAGCCCAACCCTGACCTAAAGTAAATTCCCGGAAGAAGTCTTTCCTGGGTTTTGAATTTGCAGTAACAGGTGTGAGCATTCTAGCAGCAGTTTGATGATCATGTATGATACTGCAAACAGGA	snoRNABase	-0.557642	0.0396309	0.998761	2.17596	2.7336	2.14711	2.89721	2.08932	1.92067	1.81027	1.90879	2.2488	2.28914	1.67923	2.76909	2.40478	2.13216
																						ACA17_st	20532627	ACA17_st	ACA17	ACA17	HAcaBox	Homo sapiens	chr9:139621199-139621331 (-)	133	ACTGCCCCTAGAGGCGTTGCAGCTGTGGCTGCCGTGTCACATCTGTGTCATTAGGTGGCAGAGATTAGAGAGGCTATGTCTACGCTCAGCGTTCTGCCCCGTGAACGTTTGAATGTTTGATAGTCTCACACTC	snoRNABase	-0.556778	0.018315	0.998761	2.74527	3.30205	2.13541	2.41179	2.32373	2.21034	3.86269	3.1374	2.26326	2.70164	2.95347	3.453	2.81503	2.94225
																						ENSG00000208308_x_st	20533020	ENSG00000208308_x_st	ENSG00000208308	ENSG00000208308	snoRNA	Homo sapiens	chr2:135894198-135894325 (+)	128	TGCACTTATGTATGTTTTTGTTTAACTTGTGGACAAAGACTTATGGATAGGTGCAAAAAATAAATCCTCTTTTGCAACCCAGAACTCATTGTTCAGTATGAGTTTTGATACATATAAGAAGGGATATT	Ensembl	-0.555711	0.0139161	0.948123	3.45961	4.01533	2.94095	3.4277	3.46849	2.8789	3.52114	3.48912	3.79639	3.24601	3.4751	4.35235	2.92371	4.04089
																						U109_x_st	20538131	U109_x_st	U109	U109	scaRna	Homo sapiens	chr5:82360023-82360156 (-)	134	TTGCATGTGGAAATGTCTGCTTCTCATTCCTTGGGAGCAGGAATATGTTCATAACATGCTACATTAACAAAGGAGTTCTCAGGGCTGCCAACCTTCTAGTAAAGGTTGAGTGGTAGTATATTTCTCCAACATAA	snoRNABase	-0.555046	0.00993156	0.84124	2.76987	3.32492	2.40229	3.66309	1.94727	2.60431	3.29737	2.89314	2.7742	2.57952	2.41253	3.125	3.29319	2.56612
																						ACA47_x_st	20532682	ACA47_x_st	ACA47	ACA47	scaRna	Homo sapiens	chr17:75085389-75085575 (+)	187	ACGGTCTGGGGAAAGGCTCCTGTGTTGTTGAGCCTGCCAAGTTGTGGGTGCAGCATGGTACCAGGCAGCCCAACCCTGACCTAAAGTAAATTCCCGGAAGAAGTCTTTCCTGGGTTTTGAATTTGCAGTAACAGGTGTGAGCATTCTAGCAGCAGTTTGATGATCATGTATGATACTGCAAACAGGA	snoRNABase	-0.55426	0.0106511	0.875141	2.26501	2.81927	2.02312	2.84325	2.12859	2.11166	2.05932	2.04511	2.3564	2.10508	2.06519	2.91236	2.36554	2.48391
																						ACA28_st	20532641	ACA28_st	ACA28	ACA28	HAcaBox	Homo sapiens	chr14:103804186-103804311 (+)	126	AAGCAACACTCTGTGGCAGATGATCAAAACTGTCTGACACAATTTGAGCTTGCTATAGCAAGAAAGTCTAACCTATTCCGGTGTTCTCTCTCCCATGAGACAAGCCGTTATATAGACTTAAACAGT	snoRNABase	-0.545116	0.00282954	0.606671	3.46565	4.01076	3.08094	3.64612	3.24973	3.2613	3.87874	3.73766	3.04623	3.49413	3.3447	3.91692	3.59679	4.9776
																						ACA27_x_st	20532640	ACA27_x_st	ACA27	ACA27	HAcaBox	Homo sapiens	chr13:27829538-27829663 (+)	126	TACCCCCTTTTCACTTTGCCAGTTGGACTTATGTCTTTATTGGTCATTCAAGTGGGGCAAAGGAAATATCCTTTTAAAACTCAGGCAAACTGGGTGTTTGTCTGTATCCTGTCAGAGGAAACAAAT	snoRNABase	-0.532699	0.0145335	0.949663	6.28521	6.81791	5.91669	5.90375	6.46779	5.6745	6.5743	5.61882	7.37386	6.27313	5.80836	7.2409	6.30698	6.73633
																						U109_st	20538130	U109_st	U109	U109	scaRna	Homo sapiens	chr5:82360023-82360156 (-)	134	TTGCATGTGGAAATGTCTGCTTCTCATTCCTTGGGAGCAGGAATATGTTCATAACATGCTACATTAACAAAGGAGTTCTCAGGGCTGCCAACCTTCTAGTAAAGGTTGAGTGGTAGTATATTTCTCCAACATAA	snoRNABase	-0.529737	0.0093247	0.84124	2.40433	2.93406	2.19136	3.23754	1.57546	2.27533	2.78481	2.48418	2.42208	2.29301	2.10172	2.67778	2.94073	2.33301
																						MI0017339_st	20536937	MI0017339_st	MI0017339	hsa-mir-4706	stem-loop	Homo sapiens	chr14:65511406-65511487 (+)	82	GCUACGGGGAGCGGGGAGGAAGUGGGCGCUGCUUCUGCGUUAUCUGGAAGGAGCAGCCCACUCCUGUCCUGGGCUCUGUGGU	miRBase	-0.527663	0.00386688	0.665138	1.7028	2.23046	1.61703	1.4854	1.67383	2.2048	1.57935	1.92994	1.80792	1.69795	1.49131	1.54043	3.07695	2.63377
																						U58B_x_st	20538209	U58B_x_st	U58B	U58B	CDBox	Homo sapiens	chr18:47018034-47018099 (-)	66	CTGCGATGATGGCATTTCTTAGGACACCTTTGGATTAATAATGAAAACAACTACTCTCTGAGCAGC	snoRNABase	-0.526299	0.027276	0.998761	5.47477	6.00107	5.54462	6.12385	5.09131	4.30793	6.42118	5.17576	6.1062	4.71409	5.48897	5.77379	5.4483	5.15495
																						MIMAT0028125_st	20526186	MIMAT0028125_st	MIMAT0028125	hsa-miR-7114-5p	miRNA	Homo sapiens	chr9:140344513-140344533 (-)	21	UCUGUGGAGUGGGGUGCCUGU	miRBase	-0.525659	0.0232625	0.998761	3.49532	4.02098	3.09865	3.55101	4.1141	4.62153	3.79068	3.85285	1.99005	3.52153	3.15344	3.25935	4.41889	4.28903
																						U17a_st	20538322	U17a_st	U17a	U17a	HAcaBox	Homo sapiens	chr1:28833877-28834083 (+)	207	TCCAACGTGGATACACCCGGGAGGTCACTCTCCCCGGGCTCTGTCCAAGTGGCGTAGGGGAGCATAGGGCTCTGCCCCATGATGTACAAGTCCCTTTCCACAACGTTGGAAATAAAGCTGGGCCTCGTGTCTGCGCCTGCATATTCCTACAGCTTCCCAGAGTCCTGTCGACAATTACTGGGGAGACAAACCATGCAGGAAACAGCC	snoRNABase	-0.525587	0.011443	0.876409	4.62938	5.15497	4.57571	5.4724	4.00101	4.62618	4.86367	4.10349	4.53568	4.51539	4.37933	5.22093	5.4729	5.30608
																						ACA34_x_st	20532657	ACA34_x_st	ACA34	ACA34	HAcaBox	Homo sapiens	chr12:49048165-49048301 (-)	137	GTGGCCCTGACTGAAGACCAGCAGTTGTACTGTGGCTGTTGGTTTCAAGCAGAGGCCTAAAGGACTGTCTTCCTGTGGTCTGTTGGCTGTTCTGGGACCTCAGTAGGGAATGGCTATTTCATTTGGAAGAAACAACC	snoRNABase	-0.518582	0.00452039	0.749232	3.7662	4.28478	3.85934	4.55181	3.58957	3.40425	4.73313	3.1283	3.33306	3.79607	3.59298	3.67345	4.18198	4.52386
																						SNORA38B_st	20538104	SNORA38B_st	SNORA38B	SNORA38B	HAcaBox	Homo sapiens	chr17:65736785-65736915 (+)	131	CCCTCCTACAAAGGCATGTCTATAGTTCCTTGTCTTTGGACATGTAAGAATTGGAGGCAAAGAAATGTGGACTTGGAGAAATCTGGGGCCAGCTTGCTCTCCGCAGGCTCAAGATCAACCATCCCACATAG	snoRNABase	-0.511407	0.0168996	0.99101	4.98223	5.49364	4.43583	6.13515	5.04318	4.08975	5.24011	4.87364	4.8721	4.96687	4.70927	5.45639	5.09433	5.98082
																						ACA48_x_st	20532684	ACA48_x_st	ACA48	ACA48	HAcaBox	Homo sapiens	chr17:7478031-7478165 (+)	135	TGTCCCTGACCTGGGTAGAGTGGCATCTGGTTGGTGATGCCCATCTCATATCAGCCAGGGACAAAGCAACTCCTTGTTCATCCCAGCTTGGCTTTTGATCCGTGCCCATGCCTGGTTCATGCCTTGGACACATAG	snoRNABase	-0.504497	0.0132271	0.948123	6.36304	6.86754	6.06791	7.08295	6.48933	4.93337	6.61756	6.43043	6.6584	6.39336	6.08538	6.87174	6.92356	6.42293
																						MIMAT0017994_st	20517824	MIMAT0017994_st	MIMAT0017994	hsa-miR-3615	miRNA	Homo sapiens	chr17:72744802-72744822 (+)	21	UCUCUCGGCUCCUCGCGGCUC	miRBase	-0.498791	0.0226722	0.998761	1.89943	2.39822	1.9242	2.85077	1.47163	1.4132	2.97005	1.8969	1.59731	1.95803	1.2036	1.70864	1.89363	2.41096
																						SNORA38B_x_st	20538105	SNORA38B_x_st	SNORA38B	SNORA38B	HAcaBox	Homo sapiens	chr17:65736785-65736915 (+)	131	CCCTCCTACAAAGGCATGTCTATAGTTCCTTGTCTTTGGACATGTAAGAATTGGAGGCAAAGAAATGTGGACTTGGAGAAATCTGGGGCCAGCTTGCTCTCCGCAGGCTCAAGATCAACCATCCCACATAG	snoRNABase	-0.493684	0.00386265	0.665138	4.90084	5.39452	4.51149	5.79584	5.01158	4.24311	5.10984	4.93862	4.8032	4.913	4.52834	5.15341	5.1455	5.86114
																						MIMAT0022742_st	20520351	MIMAT0022742_st	MIMAT0022742	hsa-miR-1273g-3p	miRNA	Homo sapiens	chr1:53406042-53406062 (+)	21	ACCACUGCACUCCAGCCUGAG	miRBase	-0.491032	0.00587368	0.794878	11.6235	12.1146	11.8534	11.4245	12.1481	11.3652	11.2398	11.9146	11.3088	11.7853	11.2616	11.9339	11.7785	12.3662
																						E2_st	20538305	E2_st	E2	E2	HAcaBox	Homo sapiens	chr3:39452545-39452698 (+)	154	TGTGCACATTGTTAGAGCTTGGAGTTGAGGCTACTGACTGGCCGATGAACTCGCAAGTGTAGGTAGTGTGCTACATGAGGGGCAAGTTTTCGCTAACACCACAAGGGTCTCTGGCCCAATGAGTGGAGTTTGATAGTAATTCTTGCTACAAGTA	snoRNABase	-0.490605	0.00571202	0.794878	4.41188	4.90248	4.06073	4.67165	4.65662	3.8969	4.42812	4.61874	3.95047	4.1675	4.43939	5.22866	4.14661	4.66918
																						U73a_st	20538244	U73a_st	U73a	U73a	CDBox	Homo sapiens	chr4:152024979-152025043 (+)	65	AATAAGTGATGAAAAAAGTTTCGGTCCCAGATGATGGCCAGTGATAACAACATTTTTCTGATGTT	snoRNABase	-0.483376	0.0268689	0.998761	7.48838	7.97176	7.1124	8.56735	7.31028	6.41658	7.37198	7.69113	7.27277	7.2724	7.94344	7.92544	7.21162	7.94624
																						U69_st	20538225	U69_st	U69	U69	HAcaBox	Homo sapiens	chrX:118921316-118921447 (-)	132	AAAGCAGGTTGCAATTACAGTGCTTCATTTTGTGGAAGTACTGCCATTATCCTGCTGAAAGAAAAGCCGTGTTAATCATTTTTGATTTTGCCTTTATGAGGGTAAAATCATGACAGATTGACATGGACAATT	snoRNABase	-0.481228	0.0335211	0.998761	3.67386	4.15509	3.74559	4.02592	3.1107	2.74569	3.99064	3.19003	4.36197	3.55564	3.14784	4.86458	3.59602	3.87542
																						MIMAT0016906_st	20517735	MIMAT0016906_st	MIMAT0016906	hsa-miR-4274	miRNA	Homo sapiens	chr4:7461818-7461835 (+)	18	CAGCAGUCCCUCCCCCUG	miRBase	-0.480879	0.00889275	0.84124	2.53829	3.01917	2.2648	2.50889	2.42647	2.80982	2.6229	2.22519	3.5579	2.18149	2.73805	2.04742	3.63709	3.53357
																						U14B_x_st	20538136	U14B_x_st	U14B	U14B	CDBox	Homo sapiens	chr11:17096200-17096291 (-)	92	TCACTATGATGATTGGTTGCCAGACATTCGCAGTTTCCACCAGAAATGTTTTTCCTTATGTTGGCCAGTTCTTCCTTGGATGTCTGAGTGAG	snoRNABase	-0.478745	0.0145031	0.949663	2.1387	2.61745	1.57865	2.23196	1.74205	1.91599	2.2781	1.61944	2.82377	2.50059	2.70768	1.98881	2.17706	2.04929
																						ACA41_x_st	20532671	ACA41_x_st	ACA41	ACA41	HAcaBox	Homo sapiens	chr2:207026952-207027083 (+)	132	TTCCACAGCTACTGGTCTGCAGCTGTTCTTATGGTAGCAGTTGTGGCATTCCTCTGTGGGAAAGAAACTGTTAACACAAACACCTCTTTCTTAGCAAAACAGAAAGTGGGTATATATGTGTGACAGACACAA	snoRNABase	-0.476583	0.00369313	0.665138	4.99826	5.47484	4.8247	5.67843	5.16422	4.17468	5.13835	4.75001	5.00876	5.10501	4.77914	5.35925	5.16171	5.46523
																						ACA53_st	20532690	ACA53_st	ACA53	ACA53	HAcaBox	Homo sapiens	chr12:98993413-98993662 (+)	250	AACATGCTTCCTTAGATCCACCTTTGTGGATGAATCTTGAACTGAGTTCCACTTGTAAACTTCTTGTTTCTTGTGGTTCCAGTAGTCAAAGAAACATCCAGCAACTTTTTTGGTTGTATAGTCAAAGGTGCTTGAGTCATTGGCATGTAAGAGAAATATACCTGCATGTTAGTCTAACGTTCTGATAGAAATGACATGCATTTATGCTGCCATTTGTTACTATCAGGACTCGACTCGTGTGCGGACATTT	snoRNABase	-0.475827	0.000453569	0.301265	3.5795	4.05533	3.34889	3.72351	3.84508	3.12192	3.77302	3.67754	3.15085	3.8372	3.60028	3.7167	3.92996	3.87751
																						U21_st	20538148	U21_st	U21	U21	CDBox	Homo sapiens	chr1:93302846-93302940 (+)	95	GCTGAATGATGATATCCCACTAACTGAGCAGTCAGTAGTTGGTCCTTTGGTTGCATATGATGCGATAATTGTTTCAAGACGGGACTGATGGCAGC	snoRNABase	-0.474864	0.0356925	0.998761	6.49281	6.96768	5.83968	7.17168	6.03598	5.8209	6.59568	6.59885	6.24954	6.84341	7.01205	6.76035	5.96784	7.01009
																						MI0021259_st	20537265	MI0021259_st	MI0021259	hsa-mir-6125	stem-loop	Homo sapiens	chr12:62654140-62654235 (+)	96	GCUCUGGGGCGUGCCGCCGCCGUCGCUGCCACCUCCCCUACCGCUAGUGGAAGAAGAUGGCGGAAGGCGGAGCGGCGGAUCUGGACACCCAGCGGU	miRBase	-0.472473	0.00666785	0.794878	3.23886	3.71134	2.73738	3.47084	2.52007	3.69749	3.39736	3.52282	2.96191	3.6074	3.40736	3.06602	3.50861	3.62655
																						MIMAT0022714_st	20504582	MIMAT0022714_st	MIMAT0022714	hsa-miR-766-5p	miRNA	Homo sapiens	chrX:118780762-118780783 (-)	22	AGGAGGAAUUGGUGCUGGUCUU	miRBase	-0.471199	0.0131383	0.948123	1.62553	2.09673	1.40685	1.24296	1.55983	2.00826	2.10007	1.88657	1.36027	1.62683	1.80057	1.26306	2.7855	3.03549
																						MIMAT0005593_st	20506790	MIMAT0005593_st	MIMAT0005593	hsa-miR-1238-3p	miRNA	Homo sapiens	chr19:10662859-10662878 (+)	20	CUUCCUCGUCUGUCUGCCCC	miRBase	-0.470421	0.0215443	0.998761	1.99567	2.46609	1.62694	2.81747	1.83215	1.89213	2.10121	2.75392	1.65726	1.49731	1.62528	2.15304	3.43326	2.27071
																						U75_st	20538247	U75_st	U75	U75	CDBox	Homo sapiens	chr1:173836017-173836076 (-)	60	AGCCTGTGATGCTTTAAGAGTAGTGGACAGAAGGGATTTCTGAAATTCTATTCTGAGGCT	snoRNABase	-0.464697	0.0236831	0.998761	7.95197	8.41667	7.77455	7.50489	7.48499	7.2394	8.53745	7.97912	8.38519	7.76298	8.1186	8.73257	8.25859	7.54038
																						U81_x_st	20538256	U81_x_st	U81	U81	CDBox	Homo sapiens	chr1:173833284-173833360 (-)	77	CAGAATACATGATGATCTCAATCCAACTTGAACTCTCTCACTGATTACTTGATGACAATAAAATATCTGATATTCTG	snoRNABase	-0.441566	0.0316842	0.998761	2.58388	3.02545	2.61217	2.5067	2.54262	2.22125	2.69562	2.36993	2.9281	2.1861	2.93618	2.84015	2.11329	2.66491
																						MI0022664_st	20537563	MI0022664_st	MI0022664	hsa-mir-6819	stem-loop	Homo sapiens	chr22:36682893-36682953 (-)	61	GAGGGUUGGGGUGGAGGGCCAAGGAGCUGGGUGGGGUGCCAAGCCUCUGUCCCCACCCCAG	miRBase	-0.44046	0.0288324	0.998761	3.08864	3.5291	3.43271	3.24105	3.18549	4.0371	2.29164	3.56401	2.29328	2.78065	2.96838	3.09212	3.24464	3.79962
																						MIMAT0015216_st	20503120	MIMAT0015216_st	MIMAT0015216	kshv-miR-K12-8-5p	miRNA	Kaposi sarcoma-associated herpesvirus	KSU75698:119986-120007 (-)	22	ACUCCCUCACUAACGCCCCGCU	miRBase	-0.439589	0.000116316	0.301265	1.2251	1.66469	1.35267	1.08071	1.14489	1.30323	1.28724	1.13926	1.28636	1.48687	1.24142	0.928334	1.33039	1.53927
																						ACA7_s_st	20532720	ACA7_s_st	ACA7	ACA7	HAcaBox	Homo sapiens	chr3:12881811-12881949 (-)	139	GACCTCCTGGGATCGCATCTGGAGAGTGCCTAGTATTCTGCCAGCTTCGGAAAGGGAGGGAAAGCAAGCCTGGCAGAGGCACCCATTCCATTCCCAGCTTGCTCCGTAGCTGGCGATTGGAAGACACTCTGCGACAGTG	snoRNABase	-0.437175	0.00985045	0.84124	6.0597	6.49688	6.54428	6.09991	5.81466	5.94512	6.37178	5.80111	5.53182	5.88896	5.97795	6.62143	6.25041	6.61799
																						ACA7B_s_st	20532719	ACA7B_s_st	ACA7B	ACA7B	HAcaBox	Homo sapiens	chr3:129116053-129116191 (-)	139	GACCTCCTGGGATCGCATCTGGAGACTGCCTAGTATTCTGCCAGCTTCGGAAAGGGAGGGAAAGCAAGCCTGGCAGAGGCACCCATTCCATTCCCAGCTTGCTCCGTAGCTGGTGATTGGAAGACACTCTGCGACAGTG	snoRNABase	-0.437175	0.00985045	0.84124	6.0597	6.49688	6.54428	6.09991	5.81466	5.94512	6.37178	5.80111	5.53182	5.88896	5.97795	6.62143	6.25041	6.61799
																						ENSG00000206913_s_st	20532968	ENSG00000206913_s_st	ENSG00000206913	ENSG00000206913	snoRNA	Homo sapiens	chr11:73963459-73963597 (-)	139	GAGCTTCCAGGATCACCCCTGCAGAGTGGCTAATATTCTGCCAGCTTCGGAAAGGGAGGGGAAGCAAGCCTGGCAGAGGCACCCATTCCATTCCCAGCTTGCTTAGTAGCTGGCCATGGGAAGACACTGTGCAACACTG	Ensembl	-0.437175	0.00985045	0.84124	6.0597	6.49688	6.54428	6.09991	5.81466	5.94512	6.37178	5.80111	5.53182	5.88896	5.97795	6.62143	6.25041	6.61799
																						U103_s_st	20538122	U103_s_st	U103	U103	CDBox	Homo sapiens	chr1:31408533-31408623 (-)	91	TTGTCTGGCAATGATGACCCACTTGCCCTCACTGAGAACAAAGTTCGGTAATGAGAATCTTTGTTAATGGACTCAAGTTCTGAGCCAGACA	snoRNABase	-0.437122	0.029416	0.998761	3.99824	4.43536	3.58139	4.8662	3.3258	3.04742	4.3585	3.88873	3.97691	4.13823	4.27663	4.5226	4.10858	4.15579
																						U103B_s_st	20538121	U103B_s_st	U103B	U103B	CDBox	Homo sapiens	chr1:31421962-31422052 (-)	91	TTGTCTGGCAATGATGACCCACTTGCCCTCACTGAGAACAAAGTTCGGTAATGAGAATCTTTGTTAATGGACTCAAGTTCTGAGCCAGACA	snoRNABase	-0.437122	0.029416	0.998761	3.99824	4.43536	3.58139	4.8662	3.3258	3.04742	4.3585	3.88873	3.97691	4.13823	4.27663	4.5226	4.10858	4.15579
																						ACA41_st	20532670	ACA41_st	ACA41	ACA41	HAcaBox	Homo sapiens	chr2:207026952-207027083 (+)	132	TTCCACAGCTACTGGTCTGCAGCTGTTCTTATGGTAGCAGTTGTGGCATTCCTCTGTGGGAAAGAAACTGTTAACACAAACACCTCTTTCTTAGCAAAACAGAAAGTGGGTATATATGTGTGACAGACACAA	snoRNABase	-0.433763	0.00564014	0.794878	4.67471	5.10848	4.56649	5.33964	4.9839	3.84909	4.77594	4.37227	4.56812	4.76261	4.57573	4.95334	4.81763	5.0313
																						MI0016801_st	20536712	MI0016801_st	MI0016801	hsa-mir-4455	stem-loop	Homo sapiens	chr4:185859537-185859594 (-)	58	AGAAGGGUGUGUGUGUUUUUCCUGAGAAUAAGAGAAGGAAGGACAGCCAAAUUCUUCA	miRBase	-0.43248	0.0283733	0.998761	2.20012	2.6326	2.1099	2.90337	1.97977	2.41263	2.3297	2.28324	2.08347	2.00408	1.75842	2.13662	3.07295	2.51244
																						U14B_st	20538135	U14B_st	U14B	U14B	CDBox	Homo sapiens	chr11:17096200-17096291 (-)	92	TCACTATGATGATTGGTTGCCAGACATTCGCAGTTTCCACCAGAAATGTTTTTCCTTATGTTGGCCAGTTCTTCCTTGGATGTCTGAGTGAG	snoRNABase	-0.431607	0.0180189	0.996998	1.98044	2.41205	1.50936	2.00552	1.71987	1.72141	2.09104	1.45785	2.48518	2.37813	2.55059	1.88551	2.05044	1.79422
																						MIMAT0027562_st	20525623	MIMAT0027562_st	MIMAT0027562	hsa-miR-6831-5p	miRNA	Homo sapiens	chr5:139943312-139943335 (-)	24	UAGGUAGAGUGUGAGGAGGAGGUC	miRBase	-0.425729	0.0273297	0.998761	3.82928	4.25501	4.17302	3.57777	3.73151	4.31586	3.98156	4.22953	3.14576	3.88137	4.30102	2.95538	5.09949	3.69279
																						MIMAT0026641_st	20504591	MIMAT0026641_st	MIMAT0026641	hsa-miR-1298-3p	miRNA	Homo sapiens	chrX:113949721-113949741 (+)	21	CAUCUGGGCAACUGACUGAAC	miRBase	-0.422971	0.0441364	0.99939	1.57037	1.99335	1.18454	1.26785	1.28111	1.11714	1.35042	1.76809	1.97074	1.92438	2.14373	1.69575	1.36791	1.88848
																						ACA1_s_st	20532630	ACA1_s_st	ACA1	ACA1	HAcaBox	Homo sapiens	chr11:93465170-93465299 (-)	130	TGCCTCATTCTAGAGAATGGGCACTGTTGATCATGGTGTCCAAAAATAGTTAATGTGGCTAAATTGAGACAGGTTATGCTTCCATCACAGTATGCATATTGCAGTGGTGACAATGAGACCTGTAACATTT	snoRNABase	-0.421167	0.00687295	0.794878	1.99066	2.41182	2.2231	2.56524	1.78553	1.64381	2.09411	1.82636	2.02089	1.48112	1.92237	2.34405	2.13614	2.19523
																						ENSG00000199405_s_st	20532735	ENSG00000199405_s_st	ENSG00000199405	ENSG00000199405	snoRNA	Homo sapiens	chr8:56815282-56815414 (-)	133	AGCCTCATGCTAGATGAGAATGGGCACTGTTGATCAAGGTGTCCAAAAATAGTTAATGTGGCTAAATTGAGATAGGTTATGCTTCCATCACAGTATGCATATTGCAGTGGTGACAATGAGACCTGTAACATTT	Ensembl	-0.421167	0.00687295	0.794878	1.99066	2.41182	2.2231	2.56524	1.78553	1.64381	2.09411	1.82636	2.02089	1.48112	1.92237	2.34405	2.13614	2.19523
																						U15B_st	20538138	U15B_st	U15B	U15B	CDBox	Homo sapiens	chr11:75115465-75115610 (+)	146	CTTCAGTGATGACACGATGACGAGTCAGAAAGGTCACGTCCTGCTCTTGGTCCTTGTCAGTGCCATGTTCTGTGGTGCTGTGCACGAGTTCCTTTGGCAGAAGTGTCCTATTTATTGATCGATTTAGAGGCATTTGTCTGAGAAGG	snoRNABase	-0.417869	0.0326791	0.998761	4.84259	5.26046	5.0768	5.31386	4.16496	4.3282	5.28898	4.91912	4.75929	3.97853	5.01171	5.58448	5.52735	4.96729
																						U75_x_st	20538248	U75_x_st	U75	U75	CDBox	Homo sapiens	chr1:173836017-173836076 (-)	60	AGCCTGTGATGCTTTAAGAGTAGTGGACAGAAGGGATTTCTGAAATTCTATTCTGAGGCT	snoRNABase	-0.416253	0.0383558	0.998761	7.77217	8.18842	7.50869	7.28171	7.34375	7.06122	8.31794	7.82594	8.18323	7.64815	7.98398	8.56709	8.05939	7.39448
																						ACA48_st	20532683	ACA48_st	ACA48	ACA48	HAcaBox	Homo sapiens	chr17:7478031-7478165 (+)	135	TGTCCCTGACCTGGGTAGAGTGGCATCTGGTTGGTGATGCCCATCTCATATCAGCCAGGGACAAAGCAACTCCTTGTTCATCCCAGCTTGGCTTTTGATCCGTGCCCATGCCTGGTTCATGCCTTGGACACATAG	snoRNABase	-0.409884	0.0361282	0.998761	5.85793	6.26781	5.23089	6.65471	5.45463	5.06817	5.95378	6.21674	5.58719	6.09636	5.88127	6.43557	6.2823	6.24932
																						MI0009986_st	20536018	MI0009986_st	MI0009986	hsa-mir-1976	stem-loop	Homo sapiens	chr1:26881033-26881084 (+)	52	GCAGCAAGGAAGGCAGGGGUCCUAAGGUGUGUCCUCCUGCCCUCCUUGCUGU	miRBase	-0.408041	0.0137137	0.948123	2.18716	2.5952	2.49411	2.18756	2.28193	2.32822	1.85904	2.16237	2.49463	1.57255	2.13235	2.35883	3.41916	2.91466
																						U72_x_st	20538243	U72_x_st	U72	U72	HAcaBox	Homo sapiens	chr8:99054314-99054445 (-)	132	CTGCGAATATTCTCGCTGTTCTGATTTTGTAATAGTCAGGACAGGCTAAACATTCGCTATATTAAGACCATGCATGTGTCCCCAAACCTAGTTCTTTCCCTAGGTCTGGTTTTATAAATGCTGGTGATAAAC	snoRNABase	-0.406798	0.0185246	0.998761	3.56375	3.97055	3.97194	3.60011	3.27529	3.47839	3.60686	2.9695	3.97337	3.3281	3.68173	3.75224	4.03808	3.69193
																						ENSG00000263442_s_st	20534131	ENSG00000263442_s_st	ENSG00000263442	ENSG00000263442	snoRNA	Homo sapiens	chrHSCHR6_MHC_SSTO:31498825-31498902 (-)	78	GCCATATGATGTTTTCTTTTCGAAAGGTGAGCGCTTTGCGCAGTGATGACCCTCATCTATCACCCTTGACTGATGGCT	Ensembl	-0.405196	0.0267601	0.998761	5.80602	6.21122	5.33442	6.1985	5.78836	5.51735	5.72839	5.68786	5.43057	5.61199	6.21894	6.54383	5.65766	6.34534
																						ENSG00000264591_s_st	20534152	ENSG00000264591_s_st	ENSG00000264591	ENSG00000264591	snoRNA	Homo sapiens	chrHSCHR6_MHC_DBB:31491059-31491136 (-)	78	GCCATATGATGTTTTCTTTTCGAAAGGTGAGCGCTTTGCGCAGTGATGACCCTCATCTATCACCCTTGACTGATGGCT	Ensembl	-0.405196	0.0267601	0.998761	5.80602	6.21122	5.33442	6.1985	5.78836	5.51735	5.72839	5.68786	5.43057	5.61199	6.21894	6.54383	5.65766	6.34534
																						ENSG00000265325_s_st	20534159	ENSG00000265325_s_st	ENSG00000265325	ENSG00000265325	snoRNA	Homo sapiens	chrHSCHR6_MHC_MANN:31548377-31548454 (-)	78	GCCATATGATGTTTTCTTTTCGAAAGGTGAGCGCTTTGCGCAGTGATGACCCTCATCTATCACCCTTGACTGATGGCT	Ensembl	-0.405196	0.0267601	0.998761	5.80602	6.21122	5.33442	6.1985	5.78836	5.51735	5.72839	5.68786	5.43057	5.61199	6.21894	6.54383	5.65766	6.34534
																						ENSG00000265607_s_st	20534163	ENSG00000265607_s_st	ENSG00000265607	ENSG00000265607	snoRNA	Homo sapiens	chrHSCHR6_MHC_COX:31496333-31496410 (-)	78	GCCATATGATGTTTTCTTTTCGAAAGGTGAGCGCTTTGCGCAGTGATGACCCTCATCTATCACCCTTGACTGATGGCT	Ensembl	-0.405196	0.0267601	0.998761	5.80602	6.21122	5.33442	6.1985	5.78836	5.51735	5.72839	5.68786	5.43057	5.61199	6.21894	6.54383	5.65766	6.34534
																						ENSG00000266646_s_st	20534183	ENSG00000266646_s_st	ENSG00000266646	ENSG00000266646	snoRNA	Homo sapiens	chrHSCHR6_MHC_QBL:31499156-31499233 (-)	78	GCCATATGATGTTTTCTTTTCGAAAGGTGAGCGCTTTGCGCAGTGATGACCCTCATCTATCACCCTTGACTGATGGCT	Ensembl	-0.405196	0.0267601	0.998761	5.80602	6.21122	5.33442	6.1985	5.78836	5.51735	5.72839	5.68786	5.43057	5.61199	6.21894	6.54383	5.65766	6.34534
																						ENSG00000266755_s_st	20534187	ENSG00000266755_s_st	ENSG00000266755	ENSG00000266755	snoRNA	Homo sapiens	chrHSCHR6_MHC_MCF:31585228-31585305 (-)	78	GCCATATGATGTTTTCTTTTCGAAAGGTGAGCGCTTTGCGCAGTGATGACCCTCATCTATCACCCTTGACTGATGGCT	Ensembl	-0.405196	0.0267601	0.998761	5.80602	6.21122	5.33442	6.1985	5.78836	5.51735	5.72839	5.68786	5.43057	5.61199	6.21894	6.54383	5.65766	6.34534
																						U84_s_st	20538261	U84_s_st	U84	U84	CDBox	Homo sapiens	chr6:31508878-31508955 (-)	78	GCCATATGATGTTTTCTTTTCGAAAGGTGAGCGCTTTGCGCAGTGATGACCCTCATCTATCACCCTTGACTGATGGCT	snoRNABase	-0.405196	0.0267601	0.998761	5.80602	6.21122	5.33442	6.1985	5.78836	5.51735	5.72839	5.68786	5.43057	5.61199	6.21894	6.54383	5.65766	6.34534
																						MIMAT0000728_st	20501237	MIMAT0000728_st	MIMAT0000728	hsa-miR-375	miRNA	Homo sapiens	chr2:219866370-219866391 (-)	22	UUUGUUCGUUCGGCUCGCGUGA	miRBase	-0.401236	0.0348023	0.998761	1.10375	1.50499	0.874524	0.9435	1.27037	1.33533	1.28295	1.07011	1.21396	1.05757	0.81712	1.1721	2.00663	1.3558
																						SNORA84_x_st	20538108	SNORA84_x_st	SNORA84	SNORA84	HAcaBox	Homo sapiens	chr9:95054743-95054875 (-)	133	GCCCTGTGGTTGCTGGATGCTGTTGTGCATGGACAGCTCTCCAGTGGATTCGATGGGCCATAGCAATCCTGTGATTTATGCATGGAGGCTGCTTCTCCTCAGCAGCTGCCATAGCCCGGTCGCTGGTACATGA	snoRNABase	-0.385016	0.0446987	0.99939	1.84256	2.22758	1.43944	2.61039	1.60514	1.71207	1.83463	2.06044	1.17901	2.25646	1.52785	2.2002	2.33497	2.54488
																						ENSG00000239123_st	20533733	ENSG00000239123_st	ENSG00000239123	ENSG00000239123	snoRNA	Homo sapiens	chr7:138167225-138167328 (-)	104	ATCCTTTTGTGGTTCATAAGCATGATGATCAGGTTTTCAGGCATATGTGTACGATGTGCCTCCTTCAAACTTTGTTAGGATGCTACCACGCTACCCATCTGACT	Ensembl	-0.383489	0.000891649	0.359859	1.68666	2.07015	1.47661	1.86974	1.81094	1.73778	1.40759	1.9097	1.35555	1.71179	1.81312	1.77375	2.27909	1.68947
																						MI0014245_st	20536317	MI0014245_st	MI0014245	hsa-mir-3197	stem-loop	Homo sapiens	chr21:42539484-42539556 (+)	73	GGCGAGGGGAGGCGCAGGCUCGGAAAGGCGCGCGAGGCUCCAGGCUCCUUCCCGAUCCACCGCUCUCCUCGCU	miRBase	-0.380327	0.00321055	0.637584	2.20465	2.58498	2.06396	2.28478	2.34348	2.51044	2.30623	2.32323	1.79788	2.51589	1.91755	1.98306	2.88139	2.11483
																						U93_st	20538273	U93_st	U93	U93	scaRna	Homo sapiens	chr14:95999692-95999966 (-)	275	AATCTGTAGTCTTGGAGCCGCACAGGGTTGGTGGTACCCTCGAGCACACCAGACTTGCAGAAAAAGCATACTCCAGAGGAAGCTGAGGCATGCCTGCTCGAGAGCCAGCTGTTCCATGTGCAATTTTCCTCTGATAGTTTCTGGTCACTGTTGCCACGGTGATAATGACTGGGCTATGTCATTATCTATCCGCCAACAGTAAGAGAAGCTTTGCAGTCGAGATATTGTTTAGCAGATGGAGTGTTTTCTGTTGAACACTAAGTACTGCCACAAGT	snoRNABase	-0.377492	0.0218794	0.998761	3.41253	3.79002	2.76666	3.20067	3.13583	3.03593	3.78911	3.75724	3.4691	3.35187	3.61832	4.00061	3.09498	3.73901
																						MI0005757_st	20535686	MI0005757_st	MI0005757	hsa-mir-935	stem-loop	Homo sapiens	chr19:54485561-54485651 (+)	91	GGCGGGGGCGCGGGCGGCAGUGGCGGGAGCGGCCCCUCGGCCAUCCUCCGUCUGCCCAGUUACCGCUUCCGCUACCGCCGCCGCUCCCGCU	miRBase	-0.37592	0.00230903	0.587742	1.39728	1.7732	1.35516	1.51802	1.05892	1.90951	1.53616	1.21463	1.16808	1.49599	1.42175	1.29456	1.88408	1.29071
																						ACA67B_st	20532712	ACA67B_st	ACA67B	ACA67B	HAcaBox	Homo sapiens	chr2:10586840-10586975 (-)	136	GCATGGGTTTGGATTTATGACAGGCCCGTCACCCTGGGCCTGTCATAGTACCCCATGCCAGAGCAAACTGTGTCCCCGAACCATTGCCTGGCCTCTGTGCCCGTAGGCTGCTGGCACTGAAGTGGGTTGCACAGTG	snoRNABase	-0.375752	0.0151154	0.960249	1.64873	2.02448	2.02276	1.80593	1.40503	1.52142	1.81568	1.64042	1.48955	1.73979	1.22143	1.82529	2.05063	1.68283
																						SNORA84_st	20538107	SNORA84_st	SNORA84	SNORA84	HAcaBox	Homo sapiens	chr9:95054743-95054875 (-)	133	GCCCTGTGGTTGCTGGATGCTGTTGTGCATGGACAGCTCTCCAGTGGATTCGATGGGCCATAGCAATCCTGTGATTTATGCATGGAGGCTGCTTCTCCTCAGCAGCTGCCATAGCCCGGTCGCTGGTACATGA	snoRNABase	-0.372119	0.0415853	0.998761	1.67884	2.05096	1.41809	2.39323	1.51041	1.52739	1.92355	1.65634	1.14001	2.01643	1.47159	1.7314	2.03655	2.0308
																						MIMAT0019724_st	20519442	MIMAT0019724_st	MIMAT0019724	hsa-miR-4657	miRNA	Homo sapiens	chr7:44921377-44921399 (-)	23	AAUGUGGAAGUGGUCUGAGGCAU	miRBase	-0.369859	0.0302507	0.998761	1.53456	1.90442	1.38752	1.31407	1.49821	1.56813	1.59669	1.67095	1.34944	1.12692	2.18737	1.64628	1.32911	2.08069
																						MI0000746_st	20534825	MI0000746_st	MI0000746	hsa-mir-99b	stem-loop	Homo sapiens	chr19:52195865-52195934 (+)	70	GGCACCCACCCGUAGAACCGACCUUGCGGGGCCUUCGCCGCACACAAGCUCGUGUCUGUGGGUCCGUGUC	miRBase	-0.369253	0.00880928	0.84124	2.78413	3.15338	3.16772	3.5898	2.89831	2.46426	2.76536	2.67481	2.1804	3.02001	2.37812	2.70248	3.43802	3.16647
																						MIMAT0027651_st	20525712	MIMAT0027651_st	MIMAT0027651	hsa-miR-6875-3p	miRNA	Homo sapiens	chr7:100465702-100465723 (+)	22	AUUCUUCCUGCCCUGGCUCCAU	miRBase	-0.361083	0.00481478	0.768237	1.62728	1.98836	1.67286	1.57626	1.86351	1.63088	1.47375	1.52721	1.47219	1.71986	1.62707	1.70917	2.26625	1.80046
																						ACA32_st	20532651	ACA32_st	ACA32	ACA32	HAcaBox	Homo sapiens	chr11:93464145-93464265 (-)	121	TGGTCATTACCAAGGCTTTTAGAATGCAGTTTCTCATTTGCTGTGGACATGACCATAAAAAAATTTCCCAGTAGGTTTTCTATCTGCTACTTTGCTAGCAATCAGCTTATTGGGAACAGTT	snoRNABase	-0.354341	0.0412423	0.998761	6.59265	6.94699	6.14756	7.32965	6.34628	5.87802	7.05059	6.335	6.51488	6.44315	6.56821	7.31317	6.17447	6.98401
																						ACA33_x_st	20532654	ACA33_x_st	ACA33	ACA33	HAcaBox	Homo sapiens	chr6:133138358-133138490 (+)	133	AAGCCAGCCAATGAATCTGCTTACCTGATTGTGTTTGTGCAGACATACTTTAAAAACTGGCAATAGTAAAGCCATGTTACGAGCCTTAAGGACATTGAAGTCGTTAAGGTCCCTGAGAATGGCTATAACAAAT	snoRNABase	-0.350736	0.0325794	0.998761	5.55007	5.9008	5.15265	5.99225	5.79301	4.98274	5.89902	4.91733	6.0954	5.63726	5.23043	5.80058	5.28438	5.89338
																						MIMAT0023699_st	20523006	MIMAT0023699_st	MIMAT0023699	hsa-miR-6074	miRNA	Homo sapiens	chr12:66417430-66417449 (-)	20	GAUAUUCAGAGGCUAGGUGG	miRBase	-0.350386	0.0319651	0.998761	1.43209	1.78248	0.967101	1.25126	0.960512	1.38926	1.73806	2.21217	0.972851	1.31143	1.54431	1.97397	1.6757	1.99049
																						ACA13_st	20532621	ACA13_st	ACA13	ACA13	HAcaBox	Homo sapiens	chr5:111497182-111497314 (+)	133	AGCCTTTGTGTTGCCCATTCACTTTGGAAACTAGTGAATGTGGTGTCAAAAAAGGCGTAAATTAAACGCTTTGCAGCCTTTTCCTGCCCTTAAATTTGATACCTTTGGTGTAGGAGCTGCATAAGTAACAGTT	snoRNABase	-0.346	0.0126241	0.948123	4.96188	5.30788	4.15421	5.38144	5.13472	4.70064	5.09589	4.88111	4.82687	5.12916	4.8072	5.50758	4.92241	5.60907
																						MIMAT0004682_st	20501198	MIMAT0004682_st	MIMAT0004682	hsa-miR-361-3p	miRNA	Homo sapiens	chrX:85158646-85158668 (-)	23	UCCCCCAGGUGUGAUUCUGAUUU	miRBase	-0.344892	0.00663402	0.794878	1.54343	1.88832	1.8488	1.71977	1.62411	1.91254	1.68244	1.42102	1.26226	1.36414	1.47283	1.1264	1.95568	2.00684
																						ACA32_x_st	20532652	ACA32_x_st	ACA32	ACA32	HAcaBox	Homo sapiens	chr11:93464145-93464265 (-)	121	TGGTCATTACCAAGGCTTTTAGAATGCAGTTTCTCATTTGCTGTGGACATGACCATAAAAAAATTTCCCAGTAGGTTTTCTATCTGCTACTTTGCTAGCAATCAGCTTATTGGGAACAGTT	snoRNABase	-0.339094	0.0422436	0.99939	5.90785	6.24694	5.58468	6.63529	5.65281	5.33754	6.38271	5.59979	5.74421	5.74269	5.78162	6.61716	5.50233	6.12834
																						ACA46_st	20532680	ACA46_st	ACA46	ACA46	HAcaBox	Homo sapiens	chr16:58582403-58582537 (-)	135	AGCACTATATTTAAACCTGTGGATGGGAATATTCCCCATTCTTGGTTACGCTGTAGTGCAAAAGAATTCCTGGCTCTCTGTTGCACAGCTGACTTGTGCCATTCTGCTGTTGCTGTATAGAGTTAAGGAACATGG	snoRNABase	-0.338288	0.0273664	0.998761	2.94209	3.28038	2.65971	3.66011	2.28716	2.86332	2.70661	3.20089	2.58411	3.1417	3.00646	3.31081	2.81212	3.31101
																						U82_st	20538257	U82_st	U82	U82	CDBox	Homo sapiens	chr2:232325079-232325153 (-)	75	ACAGCACAAATGATGAATAACAAAGGGACTTAATACTGAAACCTGATGTTACATTGTAGTGTGCTGATGTGCTGT	snoRNABase	-0.328227	0.0399076	0.998761	5.13495	5.46317	4.96491	5.40751	4.77229	4.47186	5.21342	5.01225	4.981	5.15705	5.70908	5.6601	4.67682	5.60999
																						ACA38_s_st	20532665	ACA38_s_st	ACA38	ACA38	HAcaBox	Homo sapiens	chr6:31590856-31590987 (+)	132	TCCTCCTACAAAGGCGTGTCTGTGGTTCCCTGTCTTTGGACACGTAAGAATTGGAGGAAAATAAATGTGGATTTGGGAAACTTTGAGGCCAGCTTGCTTCTTGCAGGCTCATGATCAACCAATCTCACATAA	snoRNABase	-0.327364	0.0387498	0.998761	2.59101	2.91837	2.7388	3.18645	2.85607	2.0599	2.92674	2.29897	2.41007	2.84415	2.32293	2.26598	2.99071	2.82857
																						ENSG00000263879_s_st	20534140	ENSG00000263879_s_st	ENSG00000263879	ENSG00000263879	snoRNA	Homo sapiens	chrHSCHR6_MHC_COX:31578266-31578397 (+)	132	TCCTCCTACAAAGGCGTGTCTGTGGTTCCCTGTCTTTGGACACGTAAGAATTGGAGGAAAATAAATGTGGATTTGGGAAACTTTGAGGCCAGCTTGCTTCTTGCAGGCTCATGATCAACCAATCTCACATAA	Ensembl	-0.327364	0.0387498	0.998761	2.59101	2.91837	2.7388	3.18645	2.85607	2.0599	2.92674	2.29897	2.41007	2.84415	2.32293	2.26598	2.99071	2.82857
																						ENSG00000263994_s_st	20534142	ENSG00000263994_s_st	ENSG00000263994	ENSG00000263994	snoRNA	Homo sapiens	chrHSCHR6_MHC_SSTO:31580798-31580929 (+)	132	TCCTCCTACAAAGGCGTGTCTGTGGTTCCCTGTCTTTGGACACGTAAGAATTGGAGGAAAATAAATGTGGATTTGGGAAACTTTGAGGCCAGCTTGCTTCTTGCAGGCTCATGATCAACCAATCTCACATAA	Ensembl	-0.327364	0.0387498	0.998761	2.59101	2.91837	2.7388	3.18645	2.85607	2.0599	2.92674	2.29897	2.41007	2.84415	2.32293	2.26598	2.99071	2.82857
																						ENSG00000264153_s_st	20534144	ENSG00000264153_s_st	ENSG00000264153	ENSG00000264153	snoRNA	Homo sapiens	chrHSCHR6_MHC_QBL:31581097-31581228 (+)	132	TCCTCCTACAAAGGCGTGTCTGTGGTTCCCTGTCTTTGGACACGTAAGAATTGGAGGAAAATAAATGTGGATTTGGGAAACTTTGAGGCCAGCTTGCTTCTTGCAGGCTCATGATCAACCAATCTCACATAA	Ensembl	-0.327364	0.0387498	0.998761	2.59101	2.91837	2.7388	3.18645	2.85607	2.0599	2.92674	2.29897	2.41007	2.84415	2.32293	2.26598	2.99071	2.82857
																						ENSG00000265754_s_st	20534173	ENSG00000265754_s_st	ENSG00000265754	ENSG00000265754	snoRNA	Homo sapiens	chrHSCHR6_MHC_MCF:31667152-31667283 (+)	132	TCCTCCTACAAAGGCGTGTCTGTGGTTCCCTGTCTTTGGACATGTAAGAATTGGAGGAAAATAAATGTGGATTTGGGAAACTTTGAGGCCAGCTTGCTTCTTGCAGGCTCATGATCAACCAATCTCACATAA	Ensembl	-0.327364	0.0387498	0.998761	2.59101	2.91837	2.7388	3.18645	2.85607	2.0599	2.92674	2.29897	2.41007	2.84415	2.32293	2.26598	2.99071	2.82857
																						ENSG00000266004_s_st	20534177	ENSG00000266004_s_st	ENSG00000266004	ENSG00000266004	snoRNA	Homo sapiens	chrHSCHR6_MHC_DBB:31573034-31573165 (+)	132	TCCTCCTACAAAGGCGTGTCTGTGGTTCCCTGTCTTTGGACATGTAAGAATTGGAGGAAAATAAATGTGGATTTGGGAAACTTTGAGGCCAGCTTGCTTCTTGCAGGCTCATGATCAACCAATCTCACATAA	Ensembl	-0.327364	0.0387498	0.998761	2.59101	2.91837	2.7388	3.18645	2.85607	2.0599	2.92674	2.29897	2.41007	2.84415	2.32293	2.26598	2.99071	2.82857
																						ENSG00000266847_s_st	20534189	ENSG00000266847_s_st	ENSG00000266847	ENSG00000266847	snoRNA	Homo sapiens	chrHSCHR6_MHC_MANN:31630340-31630471 (+)	132	TCCTCCTACAAAGGCGTGTCTGTGGTTCCCTGTCTTTGGACACGTAAGAATTGGAGGAAAATAAATGTGGATTTGGGAAACTTTGAGGCCAGCTTGCTTCTTGCAGGCTCATGATCAACCAATCTCACATAA	Ensembl	-0.327364	0.0387498	0.998761	2.59101	2.91837	2.7388	3.18645	2.85607	2.0599	2.92674	2.29897	2.41007	2.84415	2.32293	2.26598	2.99071	2.82857
																						ACA66_st	20532711	ACA66_st	ACA66	ACA66	scaRna	Homo sapiens	chr17:58308877-58309006 (-)	130	GCCTCTCTCCCATGGGCTTTGGGGGGTCCCTGTTCTCCTTAGCCAAGGCTGGAGGCCAAGAGCAGCCCTCGAGGATCGTCGTCAGGACTGCCACGAGTGGGGCAGCCTTGTTTTCCTGCCTCAGACATGT	snoRNABase	-0.32049	0.0345119	0.998761	2.32048	2.64097	2.19561	2.75992	2.07811	1.85707	2.72768	2.80728	1.76981	2.4707	1.98483	2.55379	2.84796	2.5117
																						MI0000083_x_st	20534370	MI0000083_x_st	MI0000083	hsa-mir-26a-1	stem-loop	Homo sapiens	chr3:38010895-38010971 (+)	77	GUGGCCUCGUUCAAGUAAUCCAGGAUAGGCUGUGCAGGUCCCAAUGGGCCUAUUCUUGGUUACUUGCACGGGGACGC	miRBase	-0.318908	0.0196871	0.998761	2.0289	2.34781	2.21595	2.31097	1.9633	2.5639	1.87069	2.17576	1.78817	2.04314	2.01822	1.33895	2.26584	2.21213
																						HBII-429_st	20534248	HBII-429_st	HBII-429	HBII-429	CDBox	Homo sapiens	chr6:133137941-133138016 (+)	76	GCTGTACATGATGACAACTGGCTCCCTCTACTGAACTGCCATGAGGAAACTGCCATGTCACCCTTCTGATTACAGC	snoRNABase	-0.312855	0.0472551	0.99939	8.50003	8.81289	8.26244	8.37109	8.62018	7.74869	8.94601	8.32402	8.74754	8.52563	8.54247	8.91223	8.30444	8.69739
																						MIMAT0027681_st	20525742	MIMAT0027681_st	MIMAT0027681	hsa-miR-6890-3p	miRNA	Homo sapiens	chr3:49137287-49137306 (-)	20	CCACUGCCUAUGCCCCACAG	miRBase	-0.303674	0.0317988	0.998761	1.34878	1.65246	0.828771	1.51779	1.16087	1.27838	1.4718	1.18652	1.61842	1.6262	1.47248	1.3266	1.5948	1.81854
																						MIMAT0027655_st	20525716	MIMAT0027655_st	MIMAT0027655	hsa-miR-6877-3p	miRNA	Homo sapiens	chr9:135927422-135927442 (+)	21	CAGCCUCUGCCCUUGGCCUCC	miRBase	-0.300876	0.0461117	0.99939	1.56504	1.86592	1.83909	1.93262	1.9434	1.49117	1.76249	1.34413	1.55083	1.25015	0.830374	1.70619	2.37762	2.12257
																						MI0020352_st	20537248	MI0020352_st	MI0020352	hsa-mir-6075	stem-loop	Homo sapiens	chr5:1510877-1510971 (-)	95	GACACCACAUGCUCCUCCAGGCCUGCCUGCCCUCCAGGUCAUGUUCCAGUGUCCCACAGAUGCAGCACCACGGCCCAGGCGGCAUUGGUGUCACC	miRBase	-0.29961	0.00797727	0.829274	2.78796	3.08757	2.97366	2.68153	2.89848	3.20661	2.85469	2.65982	2.88877	2.65027	2.50231	2.56341	2.95431	3.50871
																						MI0022741_st	20537640	MI0022741_st	MI0022741	hsa-mir-6894	stem-loop	Homo sapiens	chrX:53228071-53228127 (-)	57	CAAGAAGGAGGAUGGAGAGCUGGGCCAGACAUGCUCUUGCCUGCCCUCUUCCUCCAG	miRBase	-0.296252	0.00573045	0.794878	1.51775	1.814	1.45224	1.77936	1.53978	1.5778	1.37889	1.37047	1.34085	1.43431	1.66321	1.64057	2.29926	1.7507
																						MIMAT0019744_st	20519462	MIMAT0019744_st	MIMAT0019744	hsa-miR-4667-3p	miRNA	Homo sapiens	chr9:35608136-35608156 (+)	21	UCCCUCCUUCUGUCCCCACAG	miRBase	-0.295143	0.00623753	0.794878	1.5788	1.87394	1.58062	1.80423	1.75324	1.6564	1.41815	1.45264	1.46729	1.24209	1.94413	1.46921	2.24577	1.70412
																						MIMAT0022731_st	20515616	MIMAT0022731_st	MIMAT0022731	hsa-miR-3184-3p	miRNA	Homo sapiens	chr17:28444113-28444135 (-)	23	AAAGUCUCGCUCUCUGCCCCUCA	miRBase	-0.294987	0.0267173	0.998761	1.5798	1.87479	1.67882	1.42806	1.5678	1.91358	1.5409	1.49469	1.77705	1.78153	1.18618	1.42942	1.94171	1.42068
																						ENSG00000239121_st	20533732	ENSG00000239121_st	ENSG00000239121	ENSG00000239121	snoRNA	Homo sapiens	chr16:58652579-58652668 (+)	90	ACCCTTCCGTAGTTCATAAGCATGATGACTGGGTGTTCACATGCATGCGTGAGATATGGCAACCTCAAACGGCACATTACCTGTCTGACA	Ensembl	-0.292522	0.0220824	0.998761	1.40932	1.70184	1.07783	1.71157	1.17434	1.36678	1.51712	1.56468	1.05245	1.57727	1.76859	1.28253	1.46376	1.85457
																						MI0000273_st	20534518	MI0000273_st	MI0000273	hsa-mir-183	stem-loop	Homo sapiens	chr7:129414745-129414854 (-)	110	CCGCAGAGUGUGACUCCUGUUCUGUGUAUGGCACUGGUAGAAUUCACUGUGAACAGUCUCAGUCAGUGAAUUACCGAAGGGCCAUAAACAGAGCAGAGACAGAUCCACGA	miRBase	-0.29041	0.0161872	0.982833	1.63524	1.92565	1.11337	1.68218	1.33723	1.44227	1.89248	1.46625	1.88967	1.87696	1.52413	2.12787	1.7866	2.0058
																						ENSG00000238513_st	20533334	ENSG00000238513_st	ENSG00000238513	ENSG00000238513	snoRNA	Homo sapiens	chr15:56247899-56248002 (-)	104	ATCCTTTTGTAGTTTTTAAGTGTCATGATGGGGTGTCCATGCACATGTGTAAGATGTGCCACTCTTGAAGCTTGTTACAACATGGGCAGATTACCAATCTCACA	Ensembl	-0.290023	0.0106137	0.875141	1.42557	1.71559	1.79897	1.4548	1.23392	1.36471	1.55583	1.37091	1.22223	1.13329	1.63272	1.48832	1.50985	1.7952
																						MIMAT0012728_st	20513590	MIMAT0012728_st	MIMAT0012728	iltv-miR-I5-5p	miRNA	Infectious laryngotracheitis virus	---	24	CUUCUCGUCCCCGUCUUCUUCAGA	miRBase	-0.285732	0.0324002	0.998761	2.2499	2.53564	2.58335	2.26252	2.32617	2.29344	2.06283	2.33492	2.04974	2.60591	1.9301	2.05004	2.47374	3.15403
																						MI0006346_st	20535820	MI0006346_st	MI0006346	hsa-mir-1285-1	stem-loop	Homo sapiens	chr7:91833329-91833412 (-)	84	UGUAGAGAUAGGAUCUCACUUUGUUGCCCAGGCUGGUCUCAAACUCCUGGUCUGGGCAACAAAGUGAGACCUUAUCUCUACAAG	miRBase	-0.285693	0.00702597	0.794878	1.2984	1.5841	1.53567	1.40826	1.36286	1.26736	1.32165	1.0645	1.02542	1.25252	1.1277	1.61811	1.75622	1.33312
																						MI0022726_st	20537625	MI0022726_st	MI0022726	hsa-mir-6879	stem-loop	Homo sapiens	chr11:64785977-64786042 (+)	66	CAGAGCAGGGCAGGGAAGGUGGGAGAGGGGCCCAGCUGACCCUCCUGUCACCCGCUCCUUGCCCAG	miRBase	-0.28078	0.0487785	0.99939	1.51337	1.79415	2.01169	1.33736	1.6212	1.85859	1.40567	1.45147	1.22637	1.33414	1.28592	1.60131	2.46659	1.75311
																						MI0006346_x_st	20535821	MI0006346_x_st	MI0006346	hsa-mir-1285-1	stem-loop	Homo sapiens	chr7:91833329-91833412 (-)	84	UGUAGAGAUAGGAUCUCACUUUGUUGCCCAGGCUGGUCUCAAACUCCUGGUCUGGGCAACAAAGUGAGACCUUAUCUCUACAAG	miRBase	-0.27886	0.0201722	0.998761	1.37374	1.6526	1.67393	1.58604	1.37916	1.30004	1.53985	1.06813	0.991448	1.38282	1.19945	1.61656	1.9286	1.47265
																						ACA16_x_st	20532626	ACA16_x_st	ACA16	ACA16	HAcaBox	Homo sapiens	chr1:28907432-28907565 (-)	134	TTGGCCCTTATCGAAGCTGCAGCTGCTTCCGCATAGCTGCTGTGGTCAAAAAGGAGCCCAGAGTGACAGTTTTCCTTGACGGTCGCCGTTCTGTTTGTTGTAACTGATCTGCAACATTTTGGGAAAATACAGTT	snoRNABase	-0.27783	0.00387779	0.665138	3.47582	3.75365	3.29911	3.63231	3.25546	3.42099	3.46808	3.78799	3.44256	3.376	3.35156	3.72414	3.94931	3.70305
																						MI0000083_st	20534369	MI0000083_st	MI0000083	hsa-mir-26a-1	stem-loop	Homo sapiens	chr3:38010895-38010971 (+)	77	GUGGCCUCGUUCAAGUAAUCCAGGAUAGGCUGUGCAGGUCCCAAUGGGCCUAUUCUUGGUUACUUGCACGGGGACGC	miRBase	-0.276752	0.0284204	0.998761	2.03601	2.31276	2.19499	2.26502	1.95326	2.59181	1.88544	2.15233	1.84055	1.98369	2.07194	1.42108	2.22796	2.09284
																						MIMAT0000773_st	20501314	MIMAT0000773_st	MIMAT0000773	hsa-miR-346	miRNA	Homo sapiens	chr10:88024504-88024526 (-)	23	UGUCUGCCCGCAUGCCUGCCUCU	miRBase	-0.276732	0.0388028	0.998761	2.45682	2.73355	2.47854	2.38271	2.23321	2.60739	2.8509	1.69468	2.62485	2.8301	2.49993	2.3659	2.51845	3.02123
																						MI0015903_st	20536514	MI0015903_st	MI0015903	hsa-mir-500b	stem-loop	Homo sapiens	chrX:49775280-49775358 (+)	79	CCCCCUCUCUAAUCCUUGCUACCUGGGUGAGAGUGCUUUCUGAAUGCAGUGCACCCAGGCAAGGAUUCUGCAAGGGGGA	miRBase	-0.273266	0.042183	0.99939	1.5101	1.78337	0.943402	1.75952	1.41021	1.35626	1.39735	1.60186	1.31305	1.85437	1.5497	1.91528	1.37638	1.60263
																						MI0015866_st	20536477	MI0015866_st	MI0015866	hsa-mir-4326	stem-loop	Homo sapiens	chr20:61918160-61918218 (+)	59	GCUGCUCUGCUGUUCCUCUGUCUCCCAGACUCUGGGUGGAUGGAGCAGGUCGGGGGCCA	miRBase	-0.272725	0.0393938	0.998761	2.25609	2.52881	2.32292	1.89361	2.40695	2.71766	2.04143	2.40631	2.07253	2.69253	2.41494	1.59198	2.88	2.73179
																						MIMAT0022939_st	20506010	MIMAT0022939_st	MIMAT0022939	hsa-miR-939-3p	miRNA	Homo sapiens	chr8:145619376-145619396 (-)	21	CCCUGGGCCUCUGCUCCCCAG	miRBase	-0.272716	0.00458647	0.749232	1.12418	1.3969	1.07225	0.885964	0.900884	1.01283	1.23687	1.06146	1.37265	1.27605	1.12726	1.29559	1.24779	1.34209
																						MI0017284_st	20536877	MI0017284_st	MI0017284	hsa-mir-4656	stem-loop	Homo sapiens	chr7:4828196-4828270 (-)	75	AGGCUGGCGUGGGCUGAGGGCAGGAGGCCUGUGGCCGGUCCCAGGCCUCCUGCUUCCUGGGCUCAGGCUCGGUUU	miRBase	-0.270699	0.0328777	0.998761	1.403	1.6737	2.02326	1.10451	1.1131	1.90569	1.26761	1.04163	1.25904	1.35589	1.50163	1.45766	1.93065	1.45155
																						ENSG00000252829_st	20534053	ENSG00000252829_st	ENSG00000252829	ENSG00000252829	snoRNA	Homo sapiens	chr2:131687335-131687457 (-)	123	ACTGGAGGACTAAGGAGGCTGGGTCTGATGAGGCAAGATTTTGCTGATACATTGCTCCTAGAAAAAAGGGTTGGCAAGAGCAGCCCTGGAGACTCACACGGCTGACTGTTCTACCCAACACTC	Ensembl	-0.270317	0.0331732	0.998761	1.6504	1.92072	2.3441	1.75231	1.54339	1.51609	1.89642	1.58081	1.50256	1.5327	1.28173	1.55387	1.6582	1.78167
																						MIMAT0003324_st	20504411	MIMAT0003324_st	MIMAT0003324	hsa-miR-661	miRNA	Homo sapiens	chr8:145019374-145019397 (-)	24	UGCCUGGGUCUCUGGCCUGCGCGU	miRBase	-0.268983	0.00857593	0.84124	1.77328	2.04226	1.72319	1.63883	1.493	1.67251	1.79354	1.89099	1.81943	1.95395	1.78514	1.96223	2.28393	1.99817
																						MIMAT0010357_st	20504588	MIMAT0010357_st	MIMAT0010357	hsa-miR-670-5p	miRNA	Homo sapiens	chr11:43581225-43581244 (+)	20	GUCCCUGAGUGUAUGUGGUG	miRBase	-0.267367	0.0177033	0.996998	1.29422	1.56158	0.981471	1.55261	1.03508	1.06196	1.61179	1.39705	1.38288	1.4468	0.979704	1.49282	1.54316	1.84609
																						MIMAT0005829_st	20506716	MIMAT0005829_st	MIMAT0005829	hsa-miR-1184	miRNA	Homo sapiens	chrX:154115651-154115673 (-) /// chrX:154612765-154612787 (-) /// chrX:154687238-154687260 (+)	23	CCUGCAGCGACUUGAUGGCUUCC	miRBase	-0.264138	0.0282619	0.998761	1.55352	1.81766	2.14887	1.53329	1.22117	1.06741	1.82202	1.67943	1.28003	1.95047	1.05087	1.78167	1.93216	1.84948
																						MI0022960_st	20537849	MI0022960_st	MI0022960	hsa-mir-7109	stem-loop	Homo sapiens	chr22:32017453-32017517 (-)	65	GUCUCCUGGGGGGAGGAGACCCUGCUCUCCCUGGCAGCAAGCCUCUCCUGCCCUUCCAGAUUAGC	miRBase	-0.263549	0.00898112	0.84124	1.97217	2.23572	2.32653	2.06996	1.54407	1.94655	2.00729	1.81574	1.81535	2.2696	2.04687	1.87979	2.33952	2.40249
																						MI0016753_st	20536665	MI0016753_st	MI0016753	hsa-mir-4417	stem-loop	Homo sapiens	chr1:5624131-5624203 (+)	73	GAAAACAACCAGGUGGGCUUCCCGGAGGGCGGAACACCCAGCCCCAGCAUCCAGGGCUCACCUACCACGUUUG	miRBase	-0.263446	0.0359095	0.998761	3.55929	3.82274	3.58759	3.49986	3.36253	3.965	3.29278	3.84416	3.36298	3.76647	3.50874	3.40283	3.80421	3.70368
																						MI0003661_st	20535396	MI0003661_st	MI0003661	hsa-mir-646	stem-loop	Homo sapiens	chr20:58883532-58883625 (+)	94	GAUCAGGAGUCUGCCAGUGGAGUCAGCACACCUGCUUUUCACCUGUGAUCCCAGGAGAGGAAGCAGCUGCCUCUGAGGCCUCAGGCUCAGUGGC	miRBase	-0.261578	0.0215761	0.998761	1.80504	2.06662	2.36182	1.89385	1.58545	1.83526	1.86168	1.74992	1.47542	1.6208	1.91068	1.75556	2.36515	2.23358
																						MI0016767_st	20536678	MI0016767_st	MI0016767	hsa-mir-4428	stem-loop	Homo sapiens	chr1:237634419-237634491 (+)	73	UUGGCAGGUGCCAUGUUGCCUGCUCCUUACUGUACACGUGGCUGGCAAGGAGACGGGAACAUGGAGCCGCCAU	miRBase	-0.261324	0.0469071	0.99939	1.79271	2.05403	2.28177	2.39156	1.83205	1.81351	1.41148	1.74718	1.21336	2.05182	1.67702	1.50732	2.234	2.02148
																						MIMAT0005573_st	20506764	MIMAT0005573_st	MIMAT0005573	hsa-miR-1225-3p	miRNA	Homo sapiens	chr16:2140196-2140217 (-)	22	UGAGCCCCUGUGCCGCCCCCAG	miRBase	-0.259885	0.0411008	0.998761	1.41876	1.67864	1.0829	1.07604	1.60582	1.29226	1.29645	1.63857	1.98662	1.44175	1.49023	1.27692	1.65976	2.12119
																						ENSG00000239182_st	20533771	ENSG00000239182_st	ENSG00000239182	ENSG00000239182	snoRNA	Homo sapiens	chrX:117872018-117872145 (+)	128	TAGCACTGTTGCCTGAGCCATTGGTGCTCCCTGGTACTAGCTCAGTTTTAATGCAGTGCAATAGGAATTCTTTGTTTCCACAAGGCCTTGTCCTGCTGTGGGCTGCTCCTTCCCACAGTTGGACCTTG	Ensembl	-0.25487	0.0314079	0.998761	1.50958	1.76445	1.93108	1.36527	1.64047	1.37816	1.47647	1.36505	1.5376	1.73969	1.23876	1.42325	2.05145	1.45228
																						MI0017404_st	20537005	MI0017404_st	MI0017404	hsa-mir-4763	stem-loop	Homo sapiens	chr22:46509446-46509537 (+)	92	CCUGUCCCUCCUGCCCUGCGCCUGCCCAGCCCUCCUGCUCUGGUGACUGAGGACCGCCAGGCAGGGGCUGGUGCUGGGCGGGGGGCGGCGGG	miRBase	-0.253715	0.0475774	0.99939	1.59246	1.84618	1.4759	1.82269	1.59213	1.58431	1.47164	1.75078	1.39614	1.63973	1.64316	1.54813	1.92353	2.0209
																						MIMAT0019808_st	20519526	MIMAT0019808_st	MIMAT0019808	hsa-miR-4707-3p	miRNA	Homo sapiens	chr14:23426166-23426187 (-)	22	AGCCCGCCCCAGCCGAGGUUCU	miRBase	-0.251414	0.0416332	0.998761	1.51431	1.76572	1.93139	1.49714	1.82956	1.89959	1.52145	1.28919	1.55644	1.22094	1.20425	1.19317	1.74482	1.92686
																						MI0025913_st	20538037	MI0025913_st	MI0025913	hsa-mir-8077	stem-loop	Homo sapiens	chr19:42855283-42855357 (+)	75	GUGGGGCAGGGGGUGGGAUGGGCACUGGGAGUCCAAAGGAAAGGGCUGAGUGGGGUUCUGACUCCUCUGCCCAAC	miRBase	-0.243821	0.0168646	0.99101	1.58494	1.82876	1.91586	1.61356	1.11231	1.72923	1.57147	1.34235	1.56302	1.57914	1.68723	1.73526	1.77494	1.83967
																						MI0022605_st	20537503	MI0022605_st	MI0022605	hsa-mir-6760	stem-loop	Homo sapiens	chr12:111741946-111742013 (+)	68	CAGUGCAGGGAGAAGGUGGAAGUGCAGAGUGGGCUCACCUCUCGCCCACACUGUCCCCUUCUCCCCAG	miRBase	-0.240954	0.0288587	0.998761	1.86783	2.10878	1.72311	1.67863	2.12874	1.84332	2.00794	1.84971	1.77132	2.05491	2.05613	1.56446	2.40551	2.60012
																						ENSG00000212149_x_st	20533026	ENSG00000212149_x_st	ENSG00000212149	ENSG00000212149	snoRNA	Homo sapiens	chr17:41092592-41092719 (-)	128	TGCACTTATGTATGTTTTTGTTTAACTTGTGGACAAAGACTTATGGATAGGTGCAACAAATAAATCCTCTTTTGCAACCCAGAACTCATTGTTCAGCATGAGTTTTGATACATACAGGAAGGGATATT	Ensembl	-0.239794	0.0114964	0.876409	1.40742	1.64722	1.51497	1.27359	1.34905	1.40851	1.34757	1.27642	1.40038	1.18024	1.57472	1.74877	1.16688	1.68819
																						ENSG00000238582_st	20533390	ENSG00000238582_st	ENSG00000238582	ENSG00000238582	snoRNA	Homo sapiens	chr2:208938785-208938886 (-)	102	CTCCTTTTGTAGTTCAGGAGCATGATTTGGTGTTTGTGCCTAAGTGTGATATGTGCCTCCCTCTGAACCTTGTTACAGCGCTGGCACATTACCCATCCAACC	Ensembl	-0.236432	0.009851	0.84124	1.34545	1.58188	1.17458	1.39054	1.41109	1.33906	1.31701	1.47553	1.31642	1.66756	1.28987	1.07281	1.84202	1.67775
																						MI0005525_st	20535635	MI0005525_st	MI0005525	hsa-mir-300	stem-loop	Homo sapiens	chr14:101507700-101507782 (+)	83	UGCUACUUGAAGAGAGGUAAUCCUUCACGCAUUUGCUUUACUUGCAAUGAUUAUACAAGGGCAGACUCUCUCUGGGGAGCAAA	miRBase	-0.236022	0.0299304	0.998761	1.42869	1.66471	1.63052	1.34103	1.54751	1.7757	1.19389	0.997922	1.76525	1.2537	1.47437	1.30698	1.27909	1.59576
																						ENSG00000223027_st	20533189	ENSG00000223027_st	ENSG00000223027	ENSG00000223027	snoRNA	Homo sapiens	chr10:27077946-27078086 (+)	141	CCTCATTTTCTTGGCAGGAACTTGTAGTCCCACTCCCTGTTATGTACAGAGGCAAAGGGAAGAGCTCTGGCCCCCTTGGCATGTCTTTGGAGCCATGCAGCTTCCCGTCTGCCAGTTCTATCCTCAAGCACCAGGACACCA	Ensembl	-0.234215	0.04153	0.998761	2.03624	2.27046	2.01222	2.31919	1.68394	2.04533	1.67471	2.07464	2.47028	1.79596	2.28121	2.00497	2.63356	2.70812
																						ENSG00000253028_st	20534095	ENSG00000253028_st	ENSG00000253028	ENSG00000253028	snoRNA	Homo sapiens	chr7:52337133-52337265 (-)	133	TCCATCTGTTTGGCAGACCTGGAGCAGTTAGTGTCTGCTGCTAAGGTTTCCATTACAGATGTGAGAAAAAAAAGTGTTCTTCTGCTTTCTGTCTGTCTCAGTGGCAACCAAGATTGAATGGGGGATATGAGAG	Ensembl	-0.233567	0.0343013	0.998761	1.63852	1.87208	1.38181	1.49083	1.40825	1.74979	1.64961	1.52484	1.95435	1.75058	1.56258	1.91251	2.01935	2.28987
																						MI0017267_st	20536860	MI0017267_st	MI0017267	hsa-mir-4640	stem-loop	Homo sapiens	chr6:30858660-30858749 (+)	90	CUGUGGGCUGGGCCAGGGAGCAGCUGGUGGGUGGGAAGUAAGAUCUGACCUGGACUCCAUCCCACCCACCCCCUGUUUCCUGGCCCACAG	miRBase	-0.233254	0.0284226	0.998761	1.15102	1.38427	1.20962	1.07717	0.898541	1.15177	1.05163	1.21337	1.30093	1.13943	1.03422	1.43353	1.16198	1.25561
																						ENSG00000251922_st	20533830	ENSG00000251922_st	ENSG00000251922	ENSG00000251922	snoRNA	Homo sapiens	chr10:6059017-6059157 (-)	141	ATGCATCTTAGAACATCCAGGAGACAGTCTTCTAAAATACCAGTGAGTGGCAAGATATGAGTAAATTCCACAGGAAAAGGAAGGCAGTCCAAAGGGCTGTGCTTCTCCTGTGGCTCAGTGTTATTCATAGCTGTGACATCT	Ensembl	-0.231716	0.020835	0.998761	1.60418	1.8359	1.56734	1.77162	1.2994	1.82211	1.54578	1.61716	1.80544	1.73056	1.52839	1.354	2.18344	1.89256
																						MI0017325_st	20536923	MI0017325_st	MI0017325	hsa-mir-4692	stem-loop	Homo sapiens	chr11:72494575-72494637 (+)	63	GUUUUACUUGAUACCCACACUGCCUGGGUGGGACACUCAGGCAGUGUGGGUAUCAGAUAAAAC	miRBase	-0.230229	0.0294035	0.998761	2.2223	2.45253	1.95717	2.26043	2.13692	2.0258	2.33126	2.31673	2.15457	2.56054	2.30004	2.17957	2.26778	2.90642
																						MIMAT0019893_st	20519616	MIMAT0019893_st	MIMAT0019893	hsa-miR-371b-3p	miRNA	Homo sapiens	chr19:54290932-54290954 (-)	23	AAGUGCCCCCACAGUUUGAGUGC	miRBase	-0.229999	0.0411633	0.998761	1.32142	1.55142	1.55869	1.06864	1.06844	1.55606	1.4413	0.953062	1.19992	1.58085	1.5844	1.20282	1.1541	1.36012
																						MIMAT0004805_st	20504359	MIMAT0004805_st	MIMAT0004805	hsa-miR-616-3p	miRNA	Homo sapiens	chr12:57912966-57912987 (-)	22	AGUCAUUGGAGGGUUUGAGCAG	miRBase	-0.226203	0.0285677	0.998761	1.36557	1.59177	1.11809	1.49702	1.2574	1.27579	1.4327	1.58691	1.1835	1.30694	1.18155	1.81578	1.30734	1.70256
																						MI0014227_st	20536301	MI0014227_st	MI0014227	hsa-mir-3185	stem-loop	Homo sapiens	chr17:46801770-46801837 (-)	68	GAAUGGAAGAAGAAGGCGGUCGGUCUGCGGGAGCCAGGCCGCAGAGCCAUCCGCCUUCUGUCCAUGUC	miRBase	-0.22597	0.0442685	0.99939	2.47147	2.69744	2.8632	2.24438	2.43006	2.7985	2.52548	2.60962	2.1434	2.27298	2.51479	2.31234	2.85163	2.5631
																						MIMAT0004492_st	20500138	MIMAT0004492_st	MIMAT0004492	hsa-miR-19b-2-5p	miRNA	Homo sapiens	chrX:133303757-133303778 (-)	22	AGUUUUGCAGGUUUGCAUUUCA	miRBase	-0.225842	0.0436881	0.99939	0.987244	1.21309	1.35421	0.871988	1.02568	0.950511	0.864137	0.853946	1.06308	1.16895	0.652115	1.06782	1.60723	0.954614
																						MI0025892_st	20538014	MI0025892_st	MI0025892	hsa-mir-8056	stem-loop	Homo sapiens	chr5:172774458-172774539 (+)	82	CUUCUCUGAGCAUCCAGCCUCUAGGAGCUGUGCCUCCUGGCCUAUUCCUGUUCGUGGAUUGUCUGGAUGCAUCCUUGAGACU	miRBase	-0.224365	0.0244876	0.998761	1.17829	1.40265	1.10758	1.03895	1.08245	1.63581	0.987736	1.20338	1.15278	1.28204	1.18151	1.11064	1.88016	1.47887
																						MIMAT0027388_st	20525449	MIMAT0027388_st	MIMAT0027388	hsa-miR-6743-3p	miRNA	Homo sapiens	chr11:209383-209405 (+)	23	AGCCGCUCUUCUCCCUGCCCACA	miRBase	-0.222199	0.0371382	0.998761	1.23165	1.45385	1.23102	1.43074	1.1072	1.21811	1.30687	1.03699	1.67047	1.16889	0.973747	1.1725	1.7334	1.40877
																						MI0003685_st	20535420	MI0003685_st	MI0003685	hsa-mir-421	stem-loop	Homo sapiens	chrX:73438212-73438296 (-)	85	GCACAUUGUAGGCCUCAUUAAAUGUUUGUUGAAUGAAAAAAUGAAUCAUCAACAGACAUUAAUUGGGCGCCUGCUCUGUGAUCUC	miRBase	-0.222125	0.0208106	0.998761	1.85965	2.08177	1.68851	1.95131	1.78138	1.75611	2.07854	1.74216	1.77206	1.99238	1.94733	1.88669	1.80879	1.70412
																						ENSG00000238451_x_st	20533295	ENSG00000238451_x_st	ENSG00000238451	ENSG00000238451	snoRNA	Homo sapiens	chr5:70384459-70384562 (+)	104	GTCCTTTTATAGTTGATGAGCATGATGATTGGGTGTTCACACGCATGTGTGAAATGTCCCACCCTCAAATCTTGTTACAATATTGGCACATTACCCATCTGACA	Ensembl	-0.21911	0.0345085	0.998761	1.29252	1.51163	1.41098	1.47382	1.41687	1.34854	1.26897	1.21868	1.40314	1.13101	1.20853	1.04472	2.15117	1.38063
																						ENSG00000238740_x_st	20533488	ENSG00000238740_x_st	ENSG00000238740	ENSG00000238740	snoRNA	Homo sapiens	chr5:68834988-68835091 (-)	104	GTCCTTTTATAGTTGATGAGCATGATGATTGGGTGTTCACACGCATGTGTGAAATGTCCCACCCTCAAATCTTGTTACAATATTGGCACATTACCCATCTGACA	Ensembl	-0.21911	0.0345085	0.998761	1.29252	1.51163	1.41098	1.47382	1.41687	1.34854	1.26897	1.21868	1.40314	1.13101	1.20853	1.04472	2.15117	1.38063
																						ENSG00000262205_x_st	20534121	ENSG00000262205_x_st	ENSG00000262205	ENSG00000262205	snoRNA	Homo sapiens	chrHSCHR5_1_CTG1:68834750-68834853 (-)	104	GTCCTTTTATAGTTGATGAGCATGATGATTGGGTGTTCACACGCATGTGTGAAATGTCCCACCCTCAAATCTTGTTACAATATTGGCACATTACCCATCTGACA	Ensembl	-0.21911	0.0345085	0.998761	1.29252	1.51163	1.41098	1.47382	1.41687	1.34854	1.26897	1.21868	1.40314	1.13101	1.20853	1.04472	2.15117	1.38063
																						ENSG00000264351_x_st	20534148	ENSG00000264351_x_st	ENSG00000264351	ENSG00000264351	snoRNA	Homo sapiens	chrHSCHR5_1_CTG1:69531524-69531627 (+)	104	GTCCTTTTATAGTTGATGAGCATGATGATTGGGTGTTCACACGCATGTGTGAAATGTCCCACCCTCAAATCTTGTTACAATATTGGCACATTACCCATCTGACA	Ensembl	-0.21911	0.0345085	0.998761	1.29252	1.51163	1.41098	1.47382	1.41687	1.34854	1.26897	1.21868	1.40314	1.13101	1.20853	1.04472	2.15117	1.38063
																						MIMAT0001574_st	20502399	MIMAT0001574_st	MIMAT0001574	hcmv-miR-UL22A-5p	miRNA	Human cytomegalovirus	HEHCMVCG:27648-27667 (+)	20	UAACUAGCCUUCCCGUGAGA	miRBase	-0.218182	0.0423812	0.99939	1.39795	1.61613	0.989113	1.45342	1.2178	1.38988	1.68574	1.65057	1.20546	1.58571	1.25118	1.55061	1.37727	1.88319
																						MIMAT0002806_st	20503788	MIMAT0002806_st	MIMAT0002806	hsa-miR-490-3p	miRNA	Homo sapiens	chr7:136587989-136588010 (+)	22	CAACCUGGAGGACUCCAUGCUG	miRBase	-0.215514	0.0322837	0.998761	1.1286	1.34411	1.08733	1.30074	0.908089	1.20873	1.13592	1.00756	1.05467	1.10306	1.31482	1.16506	1.04727	1.85653
																						ENSG00000253049_st	20534102	ENSG00000253049_st	ENSG00000253049	ENSG00000253049	snoRNA	Homo sapiens	chr3:3144597-3144699 (+)	103	GCTGTCCTGGACCTGCCAGCACCACAGACACAGTTGCTCCTGCGTGCCTGTAACACCGGGGCAAAGAGAAAGTGGCTATTTCTACCCGAGTAGCTGGGACTAC	Ensembl	-0.214647	0.0346032	0.998761	1.92981	2.14446	1.78883	2.28389	2.02506	1.95902	2.00119	1.48698	1.82307	1.98783	2.08276	1.8595	2.51363	2.04801
																						ENSG00000238582_x_st	20533391	ENSG00000238582_x_st	ENSG00000238582	ENSG00000238582	snoRNA	Homo sapiens	chr2:208938785-208938886 (-)	102	CTCCTTTTGTAGTTCAGGAGCATGATTTGGTGTTTGTGCCTAAGTGTGATATGTGCCTCCCTCTGAACCTTGTTACAGCGCTGGCACATTACCCATCCAACC	Ensembl	-0.214559	0.0258292	0.998761	1.34352	1.55808	1.06142	1.40506	1.43062	1.3164	1.26738	1.39578	1.40693	1.64333	1.38139	1.12686	1.78742	1.81522
																						MI0022581_st	20537480	MI0022581_st	MI0022581	hsa-mir-6736	stem-loop	Homo sapiens	chr1:145584423-145584481 (+)	59	CUGAGCUGGGUGAGGGCAUCUGUGGUUUGCUGGCUGCCUCAGCUCCUCUCUACCCACAG	miRBase	-0.213461	0.0196545	0.998761	1.56616	1.77962	1.53069	1.51456	1.65516	1.77761	1.86351	1.62044	1.75569	1.21129	1.57148	1.1612	1.93112	1.71974
																						MIMAT0004693_st	20501275	MIMAT0004693_st	MIMAT0004693	hsa-miR-330-5p	miRNA	Homo sapiens	chr19:46142307-46142328 (-)	22	UCUCUGGGCCUGUGUCUUAGGC	miRBase	-0.213377	0.0358876	0.998761	1.12747	1.34085	1.30091	1.57269	0.97906	1.26013	1.17167	1.04386	0.917061	0.695301	1.22535	1.10871	1.55411	1.44121
																						MI0016783_x_st	20536694	MI0016783_x_st	MI0016783	hsa-mir-4440	stem-loop	Homo sapiens	chr2:239990513-239990610 (-)	98	CUCUCACCAAGCAAGUGCAGUGGGGCUUGCUGGCUUGCACCGUGACUCCCUCUCACCAAGCAAGUGUCGUGGGGCUUGCUGGCUUGCACUGUGAAGAU	miRBase	-0.21268	0.0388213	0.998761	2.18253	2.39521	2.25923	2.47046	1.8148	2.09735	2.43379	2.02387	2.19656	2.11149	2.36225	2.05545	2.65204	2.81898
																						MIMAT0004798_st	20504319	MIMAT0004798_st	MIMAT0004798	hsa-miR-548b-5p	miRNA	Homo sapiens	chr6:119390263-119390284 (-)	22	AAAAGUAAUUGUGGUUUUGGCC	miRBase	-0.212252	0.0494022	0.99939	1.19022	1.40247	1.25659	1.44588	1.49102	1.03825	1.28097	1.16205	1.30833	0.819207	0.978533	1.12137	1.6386	1.34579
																						MIMAT0027591_st	20525652	MIMAT0027591_st	MIMAT0027591	hsa-miR-6845-3p	miRNA	Homo sapiens	chr8:144919928-144919948 (-)	21	CCUCUCCUCCCUGUGCCCCAG	miRBase	-0.209559	0.0407889	0.998761	1.45779	1.66735	1.53266	1.27939	1.29993	1.81871	1.39027	1.61153	1.48453	1.44331	1.27811	1.43945	2.08635	1.63459
																						MI0023621_st	20537877	MI0023621_st	MI0023621	hsa-mir-7160	stem-loop	Homo sapiens	chr8:2024669-2024720 (+)	52	UGCUGAGGUCCGGGCUGUGCCCCGUACCGGACAGGGCCCUGGCUUUAGCAGA	miRBase	-0.204223	0.0312644	0.998761	1.23447	1.43869	1.31632	1.288	1.40972	1.36452	1.16752	1.19685	0.946295	1.14116	1.15039	1.3639	1.28814	1.30642
																						MI0016071_s_st	20536574	MI0016071_s_st	MI0016071	hsa-mir-3670-1	stem-loop	Homo sapiens	chr16:15001574-15001638 (+)	65	UCUAGACUGGUAUAGCUGCUUUUGGAGCCUCACCUGCUGAGAGCUCACAGCUGUCCUUCUCUAGA	miRBase	-0.203472	0.0443058	0.99939	1.29244	1.49591	1.53915	1.57996	1.23698	1.16683	1.052	1.42238	1.02873	1.27231	1.25449	1.37153	1.90184	1.23674
																						MI0019112_s_st	20537142	MI0019112_s_st	MI0019112	hsa-mir-3670-2	stem-loop	Homo sapiens	chr16:16400227-16400291 (+)	65	UCUAGACUGGUAUAGCUGCUUUUGGAGCCUCACCUGCUGAGAGCUCACAGCUGUCCUUCUCUAGA	miRBase	-0.203472	0.0443058	0.99939	1.29244	1.49591	1.53915	1.57996	1.23698	1.16683	1.052	1.42238	1.02873	1.27231	1.25449	1.37153	1.90184	1.23674
																						MI0015863_st	20536474	MI0015863_st	MI0015863	hsa-mir-4255	stem-loop	Homo sapiens	chr1:37627164-37627235 (+)	72	GAGCAUCCUUCAGUGUUCAGAGAUGGAGUCAGUAUUGGUCUGGCCAUUUUUAGGGCAAAGAGGCAGCAUCAU	miRBase	-0.199115	0.0239123	0.998761	1.917	2.11612	2.09323	1.93686	1.87301	1.60818	2.23319	1.83041	1.84977	1.88205	1.96564	1.89768	2.14673	1.84374
																						ENSG00000252640_st	20534004	ENSG00000252640_st	ENSG00000252640	ENSG00000252640	snoRNA	Homo sapiens	chr16:68664754-68664871 (-)	118	TAGTGTGGAACTGTCTACTCCTCATTCCTGTGGAAGCAGGAATACATTCATAACATGCTCCATTAAAAAAGGAGTTCTAGGCCAGGCAGCGTGCCTCATGCCTGGAATCCCAGCACTT	Ensembl	-0.19675	0.02114	0.998761	1.75952	1.95627	1.81751	1.77743	1.73476	1.59354	2.054	1.84418	1.8903	1.46265	1.64409	1.77671	1.90503	2.06054
																						ENSG00000251909_s_st	20533827	ENSG00000251909_s_st	ENSG00000251909	ENSG00000251909	snoRNA	Homo sapiens	chr10:5237847-5237936 (-)	90	TCCTCACATGGCATAATTTTACTTGTTTCTCCCATTGGAGGGCAGACTAGAACACGATGATTAGGCCGGGGGCAGTGGCTCACGCCTGTA	Ensembl	-0.196579	0.0283302	0.998761	3.47148	3.66806	3.85534	3.5735	3.44232	3.28821	3.5954	3.40242	3.31129	3.33082	3.40226	3.51325	3.81738	3.62685
																						ENSG00000265431_s_st	20534160	ENSG00000265431_s_st	ENSG00000265431	ENSG00000265431	snoRNA	Homo sapiens	chrHG871_PATCH:5238076-5238165 (-)	90	TCCTCACATGGCATAATTTTACTTGTTTCTCCCATTGGAGGGCAGACTAGAACACGATGATTAGGCCGGGGGCAGTGGCTCACGCCTGTA	Ensembl	-0.196579	0.0283302	0.998761	3.47148	3.66806	3.85534	3.5735	3.44232	3.28821	3.5954	3.40242	3.31129	3.33082	3.40226	3.51325	3.81738	3.62685
																						ENSG00000238821_x_st	20533543	ENSG00000238821_x_st	ENSG00000238821	ENSG00000238821	snoRNA	Homo sapiens	chr1:28843988-28844087 (+)	100	ATGCTCTTGTAGCTCATAAGAAGATGACTGGGTGTTCACACGCATATGAGATGTGCCTCCCTCAAACCTTGTTAAGACATGGGCACATACCCATCTGATG	Ensembl	-0.194527	0.0487481	0.99939	1.61968	1.81421	1.70776	1.84405	1.32495	1.57475	1.85179	1.70427	1.784	1.3	1.53544	1.56982	1.76186	1.73226
																						ENSG00000238522_x_st	20533340	ENSG00000238522_x_st	ENSG00000238522	ENSG00000238522	snoRNA	Homo sapiens	chr13:97709633-97709734 (+)	102	ATTCTTTTGTGGTTCAGAGCATGATAATTGGGTTTTCATGCTATGTGTGAGATGAACCTCCCTCAAACCTTGTTAAGACGTCAGCACATTACCAATCTGACA	Ensembl	-0.192263	0.0470747	0.99939	1.27563	1.46789	1.6088	1.52278	1.28966	1.42118	1.09721	1.15671	1.09681	1.25874	1.15782	1.14661	1.28883	1.51268
																						ENSG00000221139_st	20533149	ENSG00000221139_st	ENSG00000221139	ENSG00000221139	snoRNA	Homo sapiens	chr18:19030614-19030717 (-)	104	TGTTTAATGACTAAGGAAGGTCCCTGTCCCCGCCAGGGGCTGTGAGCAACACCATGGCTGCCCCAGGGCTGGCCAATTGGGCAGATGCCCAGGGGCTGAGAACA	Ensembl	-0.191524	0.0400759	0.998761	1.51006	1.70158	1.8103	1.64299	1.56477	1.60587	1.18896	1.5803	1.48599	1.43165	1.52995	1.25979	1.30339	1.80772
																						ENSG00000221639_x_st	20533171	ENSG00000221639_x_st	ENSG00000221639	ENSG00000221639	snoRNA	Homo sapiens	chr4:74129677-74129801 (+)	125	TCTGAGACTAGAGTCACATCCTGACACGGCTCTTCTCCAATGTGCTGGAGTCCTCAGCATCTGCTGGTCTTGATTCACTGATGGGGGCAACCAGTGTCCCCTTAAGTGTCCGGGCAGAAACATAC	Ensembl	-0.190043	0.0488676	0.99939	2.43981	2.62985	2.20379	2.60965	2.76011	2.44417	2.46992	2.53815	2.55364	2.3434	2.40456	2.07068	2.76634	2.67852
																						MIMAT0004549_st	20500420	MIMAT0004549_st	MIMAT0004549	hsa-miR-148a-5p	miRNA	Homo sapiens	chr7:25989580-25989601 (-)	22	AAAGUUCUGAGACACUCCGACU	miRBase	-0.187787	0.0336987	0.998761	1.60219	1.78998	1.46366	1.70135	1.83094	1.43836	1.64459	1.42252	1.71245	1.45377	1.63837	1.71593	1.61655	1.86814
																						MIMAT0022481_st	20522023	MIMAT0022481_st	MIMAT0022481	hsa-miR-5689	miRNA	Homo sapiens	chr6:10439958-10439979 (+)	22	AGCAUACACCUGUAGUCCUAGA	miRBase	-0.183777	0.0249322	0.998761	1.10274	1.28652	0.983371	1.31797	1.03892	1.34227	1.27997	1.1524	0.907793	1.0322	1.18897	0.783568	1.19167	1.32715
																						MI0002470_st	20535135	MI0002470_st	MI0002470	hsa-mir-486	stem-loop	Homo sapiens	chr8:41517959-41518026 (-)	68	GCAUCCUGUACUGAGCUGCCCCGAGGCCCUUCAUGCUGCCCAGCUCGGGGCAGCUCAGUACAGGAUAC	miRBase	-0.183328	0.0252927	0.998761	1.19156	1.37489	1.14428	1.21046	1.43024	1.15335	1.26816	0.949755	0.952913	1.25262	1.44613	1.10767	1.34869	1.48899
																						14qII-27_x_st	20532601	14qII-27_x_st	14qII-27	14qII-27	CDBox	Homo sapiens	chr14:101454498-101454566 (+)	69	TGGTTCAGTGTTGACTACTGGTGTCGTGTGAGTCATACAATGAATACATGTCTGGAACTCTGAGGCCCA	snoRNABase	-0.183046	0.0291869	0.998761	1.21259	1.39564	1.07199	1.37547	1.13939	1.23307	1.39813	1.28182	1.25494	0.901067	1.24804	1.222	1.18686	1.60667
																						ENSG00000238896_st	20533591	ENSG00000238896_st	ENSG00000238896	ENSG00000238896	snoRNA	Homo sapiens	chr6:11079248-11079346 (+)	99	ATCCTTTTGTGGTTCATAAGCTTGATGATTGAGTTTTCGCGTCCACATGTGAGATGTGCCTCCCTTGAGCCTTGTCATTGGCACATTACCTGCCTGATG	Ensembl	-0.169294	0.0499524	0.99939	1.7666	1.93589	1.81922	1.59438	2.10676	1.97698	1.74132	1.83945	1.56334	1.68994	1.70342	1.63119	1.92594	2.01044
																						ENSG00000206649_x_st	20532945	ENSG00000206649_x_st	ENSG00000206649	ENSG00000206649	snoRNA	Homo sapiens	chr8:81229174-81229304 (-)	131	CTTCCCATTTATTTGCTGCTATAGTCTCATAATGATACAAGCAGTTATATGCATGGGATAAAATAATATTGGGACATTGTAAATTGAAATGAAGTAACCATTTTCATCTTTTCTGCATGGACAAGACATTG	Ensembl	-0.167289	0.0460759	0.99939	1.19768	1.36497	1.07657	1.10671	1.07738	1.10257	1.25502	1.23149	1.37253	1.22699	1.55796	0.969568	1.36094	1.35702
																						MI0016882_st	20536794	MI0016882_st	MI0016882	hsa-mir-4516	stem-loop	Homo sapiens	chr16:2183120-2183205 (+)	86	AGGGAGAAGGGUCGGGGCAGGGAGGGCAGGGCAGGCUCUGGGGUGGGGGGUCUGUGAGUCAGCCACGGCUCUGCCCACGUCUCCCC	miRBase	-0.16693	0.0411076	0.998761	1.303	1.46993	1.43601	1.51057	1.35429	1.02213	1.0239	1.36542	1.48144	1.38972	1.18708	1.25948	1.567	1.32942
																						ENSG00000239017_s_st	20533666	ENSG00000239017_s_st	ENSG00000239017	ENSG00000239017	snoRNA	Homo sapiens	chrX:48420090-48420189 (-)	100	ATCCTTTTGTAATTCAACAATGTGATGATTGGGCTTTCACACTTGTGTGAGATGCACCTCGCTCAAACCTTGTTAACATCTGCACGGTACCTGTCTGAAG	Ensembl	0.146107	0.0476928	0.99939	1.5487	1.4026	1.79413	1.54266	1.53988	1.40871	1.51207	1.44705	1.62166	1.33782	1.68028	1.60278	1.4386	1.3916
																						ENSG00000268073_s_st	20534193	ENSG00000268073_s_st	ENSG00000268073	ENSG00000268073	snoRNA	Homo sapiens	chrHG1436_HG1432_PATCH:48421101-48421200 (-)	100	ATCCTTTTGTAATTCAACAATGTGATGATTGGGCTTTCACACTTGTGTGAGATGCACCTCGCTCAAACCTTGTTAACATCTGCACGGTACCTGTCTGAAG	Ensembl	0.146107	0.0476928	0.99939	1.5487	1.4026	1.79413	1.54266	1.53988	1.40871	1.51207	1.44705	1.62166	1.33782	1.68028	1.60278	1.4386	1.3916
																						MI0006358_st	20535835	MI0006358_st	MI0006358	hsa-mir-1297	stem-loop	Homo sapiens	chr13:54886107-54886183 (-)	77	UGUUUAUCUCUAGGGUUGAUCUAUUAGAAUUACUUAUCUGAGCCAAAGUAAUUCAAGUAAUUCAGGUGUAGUGAAAC	miRBase	0.149926	0.0401976	0.998761	1.27692	1.12699	1.16653	1.32317	1.21453	1.25347	1.19068	1.13725	1.45048	1.29558	1.54736	1.19012	0.819836	1.19662
																						MIMAT0019010_st	20518869	MIMAT0019010_st	MIMAT0019010	hsa-miR-3689f	miRNA	Homo sapiens	chr9:137742629-137742650 (-)	22	UGUGAUAUCGUGCUUCCUGGGA	miRBase	0.158521	0.0368927	0.998761	1.2148	1.05628	1.42126	0.970457	1.33743	1.38816	1.16375	0.946931	1.33681	1.34995	1.16444	1.06882	1.07777	0.897465
																						ENSG00000239084_x_st	20533715	ENSG00000239084_x_st	ENSG00000239084	ENSG00000239084	snoRNA	Homo sapiens	chr5:118804654-118804750 (-)	97	ATACAATGAATAAAGTGTGATGACTGAGTGTTCACACTCGTGTAAGATATGCCTCCCTCAAACGTTGTCATGAAATAAGCACATTGCCCAACTGATA	Ensembl	0.162183	0.0472465	0.99939	1.49587	1.33369	1.57479	1.48693	1.56723	1.49769	1.24435	1.15587	1.46429	1.72204	1.49387	1.75166	1.25107	1.52191
																						MI0003609_st	20535341	MI0003609_st	MI0003609	hsa-mir-597	stem-loop	Homo sapiens	chr8:9599182-9599278 (+)	97	UACUUACUCUACGUGUGUGUCACUCGAUGACCACUGUGAAGACAGUAAAAUGUACAGUGGUUCUCUUGUGGCUCAAGCGUAAUGUAGAGUACUGGUC	miRBase	0.165647	0.0445841	0.99939	1.27429	1.10864	1.30557	1.43604	1.28473	1.26624	1.38558	1.18538	1.17191	1.17829	1.21056	1.31859	1.33749	1.04259
																						ENSG00000201957_st	20532904	ENSG00000201957_st	ENSG00000201957	ENSG00000201957	snoRNA	Homo sapiens	chr3:178886871-178886998 (-)	128	AGGTCACTTCAAAGAGGGCTTGTGGGGCTGTGAAACCAAGAGGTCTTAACAGTATGACCAAAAACTGAAGTTCTCTATAGGATGCTGTAGCACTCAATGGTGCTATGTTTTCCTCAGGAGATATGACT	Ensembl	0.166912	0.0321119	0.998761	1.33837	1.17145	1.36719	1.4405	1.10381	1.41384	1.54936	1.19222	1.20781	1.32725	1.32535	1.45633	0.949678	1.02515
																						MIMAT0016894_st	20517722	MIMAT0016894_st	MIMAT0016894	hsa-miR-4262	miRNA	Homo sapiens	chr2:11977069-11977085 (-)	17	GACAUUCAGACUACCUG	miRBase	0.167874	0.0368074	0.998761	1.1548	0.986922	0.91225	1.30636	0.862187	1.17673	1.35651	1.19308	1.29218	1.04977	1.3184	1.0805	0.96607	1.01791
																						MI0005569_st	20535677	MI0005569_st	MI0005569	hsa-mir-216b	stem-loop	Homo sapiens	chr2:56227849-56227930 (-)	82	GCAGACUGGAAAAUCUCUGCAGGCAAAUGUGAUGUCACUGAGGAAAUCACACACUUACCCGUAGAGAUUCUACAGUCUGACA	miRBase	0.169631	0.0411285	0.998761	1.24556	1.07592	1.27613	1.20953	1.24078	1.47125	1.10945	1.19117	1.1365	1.03762	1.14853	1.6346	0.976254	0.868913
																						MI0017400_st	20537001	MI0017400_st	MI0017400	hsa-mir-4759	stem-loop	Homo sapiens	chr21:28326280-28326362 (+)	83	CAUUUAGGACUAGAUGUUGGAAUUAGACAGAAAAAAGUUAGACACAAAAAAUUGUGUCUAAUUCCAACAUCUAGUCCUAAAUG	miRBase	0.1702	0.0441382	0.99939	1.33734	1.16714	1.01669	1.22262	1.40711	1.17373	1.26955	1.48775	1.49018	1.58835	1.12705	1.59039	1.16267	1.24225
																						ENSG00000238458_st	20533298	ENSG00000238458_st	ENSG00000238458	ENSG00000238458	snoRNA	Homo sapiens	chr6:18402182-18402283 (-)	102	ATCCTCTTGTAGTTCATAAGCATGATGATTGGCTTCTCCCAGTCACATGAGATATGCCTCCCTCAAACCTGGTTACACCATAAGCACATTATCCATCTAACA	Ensembl	0.175664	0.0423882	0.99939	1.49409	1.31842	1.67194	1.49568	1.41383	1.33075	1.183	1.76519	1.2943	1.58096	1.34879	1.85643	1.25751	1.20122
																						ENSG00000239116_st	20533731	ENSG00000239116_st	ENSG00000239116	ENSG00000239116	snoRNA	Homo sapiens	chr4:184503348-184503454 (-)	107	ATTCTTTTTTGGTTCATAAGTGTGATGATTTCGTTTTCATGTTAAAGTGTGAGATCAGCCTCCCTCAAACCTTGTTACTACATCAACACCACATTATCCATCCAATG	Ensembl	0.175848	0.0397476	0.998761	1.52275	1.3469	1.58211	1.32782	1.87565	1.61365	1.41366	1.37531	1.39113	1.4809	1.65139	1.51584	1.33394	1.38589
																						ENSG00000251949_st	20533839	ENSG00000251949_st	ENSG00000251949	ENSG00000251949	snoRNA	Homo sapiens	chr14:101392317-101392388 (+)	72	TGGGCCAGTGAGGAACAGGTGTTATGAACCAAAGATAATGATTACTCCAGTTATACTCTAATGTTGTCCAGA	Ensembl	0.175922	0.04586	0.99939	1.46361	1.28769	1.92935	1.44965	1.72616	1.11575	1.42042	1.19572	1.20743	1.54904	1.60955	1.43304	1.36611	1.25622
																						MIMAT0027563_st	20525624	MIMAT0027563_st	MIMAT0027563	hsa-miR-6831-3p	miRNA	Homo sapiens	chr5:139943256-139943276 (-)	21	UGACUAACUCCCACUCUACAG	miRBase	0.178525	0.0383498	0.998761	1.23915	1.06062	1.12981	1.02579	1.38281	0.94418	1.19879	1.48462	1.42014	1.46905	1.09012	1.24616	1.14863	1.1741
																						MI0017406_st	20537007	MI0017406_st	MI0017406	hsa-mir-4765	stem-loop	Homo sapiens	chr2:32860322-32860398 (+)	77	UGGUGAUUUUGAACGUAGCUAUCCACCACUCAGCCUGGAAAAAGCUGAGUGAUUGAUAGCUAUGUUCAAAAUCACCA	miRBase	0.179482	0.0382235	0.998761	1.36191	1.18243	1.33885	1.64629	1.25557	1.04699	1.42761	1.39374	1.4909	1.26022	1.49214	1.26681	1.20572	1.36919
																						ENSG00000252565_st	20533990	ENSG00000252565_st	ENSG00000252565	ENSG00000252565	snoRNA	Homo sapiens	chr8:10641565-10641629 (+)	65	CTGACCAATGATGATAATGTGTCATGCATCATGATTAATCCAATTTAGAGTATCTGAGGTCCATT	Ensembl	0.180718	0.0492272	0.99939	1.28691	1.1062	1.18365	1.20921	1.335	1.3592	1.29845	1.01206	1.63283	1.56728	1.00342	1.26804	1.21567	0.925375
																						MIMAT0030985_st	20529768	MIMAT0030985_st	MIMAT0030985	hsa-miR-8058	miRNA	Homo sapiens	chr16:82722593-82722614 (+)	22	CUGGACUUUGAUCUUGCCAUAA	miRBase	0.182214	0.0179763	0.996998	1.28621	1.104	1.2269	0.974443	1.1573	1.38873	1.46603	1.28672	1.53634	1.26623	1.30242	1.257	0.920512	1.00668
																						MIMAT0019935_st	20519658	MIMAT0019935_st	MIMAT0019935	hsa-miR-4777-3p	miRNA	Homo sapiens	chr2:232227475-232227496 (+)	22	AUACCUCAUCUAGAAUGCUGUA	miRBase	0.185043	0.0189846	0.998761	1.1236	0.938555	1.28541	1.02821	0.997944	1.37496	1.34287	1.00104	1.09533	1.13716	1.04615	0.926893	0.839059	0.902892
																						MIMAT0016918_st	20517747	MIMAT0016918_st	MIMAT0016918	hsa-miR-4288	miRNA	Homo sapiens	chr8:28362643-28362659 (-)	17	UUGUCUGCUGAGUUUCC	miRBase	0.186636	0.0196495	0.998761	1.31553	1.12889	1.26515	1.35355	1.27646	1.40049	1.14965	1.13511	1.29635	1.5749	1.30723	1.39643	1.03012	1.33876
																						MI0015844_s_st	20536455	MI0015844_s_st	MI0015844	hsa-mir-4315-1	stem-loop	Homo sapiens	chr17:43552729-43552801 (-)	73	UGGGCUUUGCCCGCUUUCUGAGCUGGACCCUCUCUCUACCUCUGGUGCAGAACUACAGCGGAAGGAAUCUCUG	miRBase	0.187293	0.0493028	0.99939	1.98241	1.79512	2.29308	1.96431	1.91566	2.05907	2.12906	2.00776	1.71558	1.86109	1.8564	2.02209	1.76085	1.84612
																						MI0015983_s_st	20536530	MI0015983_s_st	MI0015983	hsa-mir-4315-2	stem-loop	Homo sapiens	chr17:62818148-62818220 (-)	73	UGGGCUUUGCCCGCUUUCUGAGCUGGACCCUCUCUCUACCUCUGGUGCAGAACUACAGCGGAAGGAAUCUCUG	miRBase	0.187293	0.0493028	0.99939	1.98241	1.79512	2.29308	1.96431	1.91566	2.05907	2.12906	2.00776	1.71558	1.86109	1.8564	2.02209	1.76085	1.84612
																						ENSG00000202374_st	20532926	ENSG00000202374_st	ENSG00000202374	ENSG00000202374	snoRNA	Homo sapiens	chr4:68612954-68613104 (+)	151	ATTTCATGTTTTAAAGGCATAATGATGTCACTGACTGGCTGATGAAATCCCAAGCGTAGGTAGTATGCTACATGAGGGGTGAGTTTTTTGCTAACACCACAAAGGTCTCTGGCCCAATGAGTGGAGTTTGATAGGAGTTCTTGTGACAAGT	Ensembl	0.189482	0.0440758	0.99939	1.93622	1.74674	1.99759	1.78422	2.18205	2.06568	1.83726	1.80406	1.87956	1.64656	1.67688	2.48835	1.87949	1.64287
																						ENSG00000238351_x_st	20533242	ENSG00000238351_x_st	ENSG00000238351	ENSG00000238351	snoRNA	Homo sapiens	chr4:40870886-40870987 (-)	102	ATCTTTTAGTAGTTCGTAAGCATGGTGATTGGCTTTTCATGTGCATGTGTGAAATGTGCCTTCCACAAACCTTGTTACAAAGTTGGCACACTACCATTGATG	Ensembl	0.193415	0.0295543	0.998761	1.71794	1.52453	1.76725	1.63236	1.60783	1.76961	1.65563	2.02946	1.8075	1.92783	1.32479	1.65712	1.6046	1.62882
																						MIMAT0022497_st	20522040	MIMAT0022497_st	MIMAT0022497	hsa-miR-5692b	miRNA	Homo sapiens	chr21:44371096-44371115 (-)	20	AAUAAUAUCACAGUAGGUGU	miRBase	0.194338	0.0403802	0.998761	1.36196	1.16763	1.21858	1.49525	1.14779	1.48007	1.04113	1.3376	1.58372	1.35851	1.42701	1.53	1.05302	1.33758
																						MIMAT0019945_st	20519668	MIMAT0019945_st	MIMAT0019945	hsa-miR-4782-3p	miRNA	Homo sapiens	chr2:114478875-114478896 (-)	22	UGAUUGUCUUCAUAUCUAGAAC	miRBase	0.195234	0.0212134	0.998761	1.10449	0.909259	1.1107	1.04313	1.12076	0.80847	0.841398	1.17804	1.47776	0.943103	1.367	1.15455	0.797953	1.0567
																						ENSG00000252144_st	20533887	ENSG00000252144_st	ENSG00000252144	ENSG00000252144	snoRNA	Homo sapiens	chr14:101405405-101405475 (+)	71	TGCACCAATGATGGGAATGTGTAATGAACCATGAATTATGTTTAATCTAAATCGTCACAACTGAGTTGATT	Ensembl	0.196069	0.0490708	0.99939	1.27203	1.07596	0.937047	1.35065	1.47396	1.06099	1.27042	1.35892	1.2351	1.08749	1.24123	1.7045	1.1123	1.09026
																						MI0019139_st	20537156	MI0019139_st	MI0019139	hsa-mir-5583-1	stem-loop	Homo sapiens	chr18:37256685-37256743 (+)	59	AAACUAAUAUACCCAUAUUCUGGCUAGGUGAUCAUCAGAAUAUGGGUAUAUUAGUUUGG	miRBase	0.201544	0.0163938	0.986648	1.32303	1.12149	1.21055	1.24687	1.19194	1.08351	1.38069	1.43428	1.26423	1.34822	1.57828	1.49175	1.03386	1.02706
																						MIMAT0025464_st	20525009	MIMAT0025464_st	MIMAT0025464	hsa-miR-6504-5p	miRNA	Homo sapiens	chr16:81644957-81644977 (+)	21	UCUGGCUGUGCUGUAAUGCAG	miRBase	0.206952	0.0273302	0.998761	1.12509	0.91814	0.931743	1.08484	0.98914	0.767619	1.29937	1.22358	1.52827	1.24733	1.11364	1.06541	0.723589	1.03167
																						MI0017260_st	20536853	MI0017260_st	MI0017260	hsa-mir-4633	stem-loop	Homo sapiens	chr5:128433381-128433459 (+)	79	UGGCAAGUCUCCGCAUAUGCCUGGCUAGCUCCUCCACAAAUGCGUGUGGAGGAGCUAGCCAGGCAUAUGCAGAGCGUCA	miRBase	0.208953	0.0359927	0.998761	1.42872	1.21977	1.34031	1.11546	1.54419	1.29316	1.39006	1.2964	1.89231	1.48486	1.73418	1.19626	1.05425	1.10743
																						MI0016809_st	20536720	MI0016809_st	MI0016809	hsa-mir-3135b	stem-loop	Homo sapiens	chr6:32717689-32717756 (-)	68	UGCCCAGGCUGGAGCGAGUGCAGUGGUGCAGUCAGUCCUAGCUCACUGCAGCCUCGAACUCCUGGGCU	miRBase	0.212309	0.0209059	0.998761	1.44601	1.2337	1.17933	1.59367	1.83698	1.02845	1.56244	1.60607	1.46319	1.42841	1.58352	1.17803	1.07296	1.23824
																						MIMAT0018443_st	20518718	MIMAT0018443_st	MIMAT0018443	hsa-miR-374c-5p	miRNA	Homo sapiens	chrX:73438396-73438417 (+)	22	AUAAUACAACCUGCUAAGUGCU	miRBase	0.212621	0.0314441	0.998761	1.34182	1.1292	1.20251	1.53515	1.6885	1.47854	1.16283	1.01147	1.11688	1.32605	1.30204	1.59425	1.41815	1.5174
																						ENSG00000238772_x_st	20533514	ENSG00000238772_x_st	ENSG00000238772	ENSG00000238772	snoRNA	Homo sapiens	chr7:37209283-37209384 (-)	102	TTCCTGTTGGTTCCTAAGTGTGATGATTGGGTTTTCACATTCATGTGTGACATGTGCCTCCCTCAAATCTTGTGATGATGTCGGCACGTGACCCATCTGACG	Ensembl	0.213084	0.0271106	0.998761	1.49232	1.27924	1.30084	1.60819	1.46881	1.48348	1.56781	1.41556	1.13873	1.96223	1.48066	1.4969	1.43243	1.23698
																						MIMAT0019750_st	20519468	MIMAT0019750_st	MIMAT0019750	hsa-miR-4670-5p	miRNA	Homo sapiens	chr9:95290312-95290333 (-)	22	AAGCGACCAUGAUGUAACUUCA	miRBase	0.214549	0.0480507	0.99939	1.32526	1.11071	1.17532	1.37559	1.23413	1.27717	1.12497	1.63029	1.8465	1.46191	1.18189	0.944779	1.08528	0.775261
																						ENSG00000238856_st	20533563	ENSG00000238856_st	ENSG00000238856	ENSG00000238856	snoRNA	Homo sapiens	chr1:224524493-224524591 (+)	99	ATCCTTTTGTAGTTCCTAAGTGTGAAGAATGGGTGTTCATGCAGAAGGATAAGATGTGCTACCCTCAAACCTTGTTCCGTGCATATTACACGTCTGACA	Ensembl	0.215572	0.0303033	0.998761	2.04674	1.83117	1.8676	1.95387	1.97084	1.9887	1.90289	2.16834	1.9801	2.2689	2.40543	1.96071	1.76208	1.6716
																						MIMAT0018957_st	20518814	MIMAT0018957_st	MIMAT0018957	hsa-miR-4439	miRNA	Homo sapiens	chr2:225875233-225875254 (-)	22	GUGACUGAUACCUUGGAGGCAU	miRBase	0.218376	0.0386142	0.998761	1.37284	1.15447	1.02759	1.18791	1.27927	1.77105	1.50872	1.1101	1.97701	0.949302	1.5397	1.37779	1.19326	1.17304
																						ENSG00000264379_st	20534149	ENSG00000264379_st	ENSG00000264379	ENSG00000264379	snoRNA	Homo sapiens	chr9:21524306-21524381 (-)	76	AACTATTGAGAACAAAGATGCAACATACCACTCGAGTGTGCAGTGGGGAAGCCAACCTTGGACAGCTGAGCATGTG	Ensembl	0.218704	0.0187213	0.998761	1.38608	1.16737	1.20791	1.71467	1.17177	1.38782	1.26093	1.51623	1.66425	1.29953	1.24517	1.39251	0.766466	1.32949
																						MI0017326_st	20536924	MI0017326_st	MI0017326	hsa-mir-4693	stem-loop	Homo sapiens	chr11:103720634-103720708 (+)	75	GUUUAAAGAAUACUGUGAAUUUCACUGUCACAAAUUCAAAUAAAGUGAGAGUGGAAUUCACAGUAUUUAAGGAAU	miRBase	0.219395	0.0283512	0.998761	1.4172	1.1978	1.20054	1.44835	1.19099	0.951665	1.60949	1.66893	1.56602	1.44004	1.46874	1.6272	1.05618	1.15346
																						MI0003623_st	20535357	MI0003623_st	MI0003623	hsa-mir-610	stem-loop	Homo sapiens	chr11:28078362-28078457 (+)	96	UCUAUUUGUCUUAGGUGAGCUAAAUGUGUGCUGGGACACAUUUGAGCCAAAUGUCCCAGCACACAUUUAGCUCACAUAAGAAAAAUGGACUCUAGU	miRBase	0.220226	0.0294429	0.998761	1.41907	1.19884	1.70119	1.52014	1.67427	1.0411	1.17683	1.06659	1.54071	1.24344	1.24823	1.97819	1.16422	1.32091
																						MIMAT0000272_st	20500473	MIMAT0000272_st	MIMAT0000272	hsa-miR-215-5p	miRNA	Homo sapiens	chr1:220291258-220291278 (-)	21	AUGACCUAUGAAUUGACAGAC	miRBase	0.223759	0.0434673	0.99939	1.2131	0.989345	0.938855	0.798561	1.35771	0.923862	1.6717	1.51399	1.42487	1.15944	0.899734	1.44231	0.684538	1.34071
																						MIMAT0027517_st	20525578	MIMAT0027517_st	MIMAT0027517	hsa-miR-6808-3p	miRNA	Homo sapiens	chr1:1275030-1275050 (-)	21	GUGUGACCACCGUUCCUGCAG	miRBase	0.225873	0.0111404	0.876409	1.37175	1.14588	1.24729	1.10073	1.11333	1.36144	1.53624	1.32709	1.31326	1.28522	1.70772	1.7252	1.12561	1.00795
																						MI0014188_st	20536261	MI0014188_st	MI0014188	hsa-mir-3159	stem-loop	Homo sapiens	chr11:18409334-18409407 (+)	74	CCAAAGUCCUAGGAUUACAAGUGUCGGCCACGGGCUGGGCACAGUGGCUCACGCCUGUAAUCCCAGCAUUUUGG	miRBase	0.228383	0.047312	0.99939	2.15501	1.92662	2.10213	1.95963	2.34078	2.30033	1.82188	2.28086	1.77602	2.54831	2.33216	2.08796	1.77501	2.33082
																						MI0000451_st	20534591	MI0000451_st	MI0000451	hsa-mir-133a-2	stem-loop	Homo sapiens	chr20:61162119-61162220 (+)	102	GGGAGCCAAAUGCUUUGCUAGAGCUGGUAAAAUGGAACCAAAUCGACUGUCCAAUGGAUUUGGUCCCCUUCAACCAGCUGUAGCUGUGCAUUGAUGGCGCCG	miRBase	0.231288	0.0343881	0.998761	2.11181	1.88053	2.40728	1.57969	2.05644	2.06665	2.03959	1.99621	2.29718	2.15161	2.66343	1.86007	1.93659	1.82894
																						ENSG00000252800_st	20534050	ENSG00000252800_st	ENSG00000252800	ENSG00000252800	snoRNA	Homo sapiens	chr14:63945990-63946131 (+)	142	GGCCTCTCTCCCATGGTGCTGTGGGTGGGGGAGGAGGGGTGCTTTTCTCCTCAGCGAAGACTGGAGGCAGACATCACCCCTCAAGGATCATCCTCAGAACTGCCACGTGCTGGACAGCCTTGTTTTTCTACCTCACACATTT	Ensembl	0.232225	0.0283682	0.998761	1.83331	1.60109	1.9857	1.79796	1.82296	1.72844	1.64756	2.10316	1.63179	2.04994	2.06153	1.5041	1.82524	1.54765
																						MIMAT0003418_st	20504507	MIMAT0003418_st	MIMAT0003418	ebv-miR-BART8-3p	miRNA	Epstein Barr virus	HHV507799:146807-146829 (+)	23	GUCACAAUCUAUGGGGUCGUAGA	miRBase	0.235052	0.0322316	0.998761	1.68431	1.44926	1.49587	1.81324	1.40665	2.00401	1.76052	1.21646	2.1498	1.97884	1.56979	1.4479	1.35781	1.3713
																						MIMAT0018972_st	20518829	MIMAT0018972_st	MIMAT0018972	hsa-miR-548ah-5p	miRNA	Homo sapiens	chr4:77496714-77496733 (+)	20	AAAAGUGAUUGCAGUGUUUG	miRBase	0.236142	0.0139802	0.948123	1.2783	1.04216	1.16536	1.19132	1.23353	1.55995	1.13719	1.3458	1.68851	1.17913	1.15466	1.12757	1.22621	0.89913
																						MI0003616_st	20535349	MI0003616_st	MI0003616	hsa-mir-603	stem-loop	Homo sapiens	chr10:24564614-24564710 (+)	97	GAUUGAUGCUGUUGGUUUGGUGCAAAAGUAAUUGCAGUGCUUCCCAUUUAAAAGUAAUGGCACACACUGCAAUUACUUUUGCUCCAACUUAAUACUU	miRBase	0.246457	0.0229612	0.998761	1.58673	1.34027	1.40533	1.40601	1.59643	1.48621	1.43411	1.64737	1.99231	1.46934	1.73744	1.69275	1.6668	1.24824
																						MI0000444_st	20534579	MI0000444_st	MI0000444	hsa-mir-124-2	stem-loop	Homo sapiens	chr8:65291706-65291814 (+)	109	AUCAAGAUUAGAGGCUCUGCUCUCCGUGUUCACAGCGGACCUUGAUUUAAUGUCAUACAAUUAAGGCACGCGGUGAAUGCCAAGAGCGGAGCCUACGGCUGCACUUGAA	miRBase	0.246468	0.0277922	0.998761	1.88152	1.63505	2.04021	2.01361	2.07211	2.36339	1.62828	1.99186	1.4503	1.77671	1.73126	1.74747	1.68152	1.94676
																						ENSG00000239024_st	20533671	ENSG00000239024_st	ENSG00000239024	ENSG00000239024	snoRNA	Homo sapiens	chr17:2558973-2559076 (+)	104	ATTCTTTTGTAGTTGCTACGTGTGACGACAGGGTGTTCACACACATGTGTAAGATGTACCACCCTCCAGCCTTGTTACAATGTCGTCACATTACCCGACCGATG	Ensembl	0.247718	0.0258712	0.998761	1.9172	1.66948	2.3332	1.69059	1.88078	2.09533	1.85971	1.56631	1.92693	1.93555	1.92293	1.96069	1.70167	1.55704
																						ENSG00000206961_st	20532974	ENSG00000206961_st	ENSG00000206961	ENSG00000206961	snoRNA	Homo sapiens	chr2:170584382-170584513 (+)	132	GGCTTCCTAGTACTTACCATGGTCTGTGTTCTTACGCTGACTGTATAGAAACAGGAGGCAGAGTAAACCGACCCCACATATACCTCAGCCCAGGCCCTGTGCTGCGTCTGTATTGTGAATCAGGAGACATGG	Ensembl	0.248534	0.00902525	0.84124	1.47379	1.22525	1.76733	1.62156	1.00534	1.63701	1.35411	1.66629	1.31672	1.40388	1.61742	1.34819	1.15493	1.32113
																						MIMAT0000442_st	20500764	MIMAT0000442_st	MIMAT0000442	hsa-miR-9-3p	miRNA	Homo sapiens	chr1:156390146-156390167 (-) /// chr15:89911302-89911323 (+) /// chr5:87962684-87962705 (-)	22	AUAAAGCUAGAUAACCGAAAGU	miRBase	0.249487	0.0432813	0.99939	1.34477	1.09528	1.19419	1.57254	1.06265	0.844643	1.57087	1.60991	0.929881	1.72632	1.41219	1.52448	0.896872	0.962721
																						MIMAT0002870_st	20503873	MIMAT0002870_st	MIMAT0002870	hsa-miR-499a-5p	miRNA	Homo sapiens	chr20:33578211-33578231 (+)	21	UUAAGACUUGCAGUGAUGUUU	miRBase	0.253496	0.00133507	0.416361	1.34653	1.09304	1.34235	1.43303	1.63599	1.29732	1.36095	1.50248	1.39647	1.19011	1.08992	1.21671	1.05591	1.03374
																						ENSG00000212558_st	20533113	ENSG00000212558_st	ENSG00000212558	ENSG00000212558	snoRNA	Homo sapiens	chr2:10230332-10230446 (-)	115	GTGCCTAAGGTTAACACAGCGCCTTAAGAGGCTAACACAGAAGGGCAAAGTAAGTCTCCATAAAACCCAGAGAAGACTGTGAACCCCTCTCTGGATCCTGTCTGGAGTCACAGCT	Ensembl	0.257422	0.00612539	0.794878	2.10078	1.84335	2.00565	1.97614	1.9967	2.22053	2.40628	1.81689	2.13232	2.2865	1.9325	2.23427	1.72445	2.02286
																						MI0025511_st	20537984	MI0025511_st	MI0025511	hsa-mir-4433b	stem-loop	Homo sapiens	chr2:64567881-64567982 (-)	102	UGUGUUCCCUAUCCUCCUUAUGUCCCACCCCCACUCCUGUUUGAAUAUUUCACCAGAAACAGGAGUGGGGGGUGGGACGUAAGGAGGAUGGGGGAAAGAACA	miRBase	0.258025	0.00781675	0.829274	2.04945	1.79142	2.23754	1.87793	1.92162	2.0663	2.24466	1.8731	2.15775	2.14136	1.97686	1.99738	1.82501	2.16125
																						ENSG00000239049_st	20533688	ENSG00000239049_st	ENSG00000239049	ENSG00000239049	snoRNA	Homo sapiens	chr2:88606879-88606982 (+)	104	ATCCTTTTGCAGCTCATAAGTGTGATGATTGGGTTTTCACACTCATGTGTAAGATGTGTTTCCCTCAAACCTTGCTATGATATCAGCACAGTACCTATCTGACA	Ensembl	0.258116	0.0150198	0.960249	1.69158	1.43346	1.53258	1.61203	2.05125	1.86856	1.53253	1.61958	1.40295	1.62702	1.84235	1.82694	1.35156	1.0968
																						MIMAT0026624_st	20504406	MIMAT0026624_st	MIMAT0026624	hsa-miR-651-3p	miRNA	Homo sapiens	chrX:8095059-8095080 (+)	22	AAAGGAAAGUGUAUCCUAAAAG	miRBase	0.258453	0.0356958	0.998761	1.18479	0.926338	0.783316	1.1279	1.17495	0.981353	1.3998	1.17343	2.02005	1.14168	1.07675	0.968686	0.74096	0.816459
																						MI0017436_st	20537045	MI0017436_st	MI0017436	hsa-mir-4789	stem-loop	Homo sapiens	chr3:175087329-175087410 (+)	82	CAUGCUACGUAUGUAUACACCUGAUAUGUGUAUGUGUAAAUACAUAUCCACACACAUAGCAGGUGUAUAUAUAGGUAGCCUG	miRBase	0.259655	0.00746413	0.82599	1.28358	1.02393	1.30489	1.06776	1.17142	1.30232	1.0083	1.50368	1.87804	1.24857	1.25833	1.09252	0.986765	0.801731
																						ENSG00000239089_st	20533718	ENSG00000239089_st	ENSG00000239089	ENSG00000239089	snoRNA	Homo sapiens	chr20:34708884-34708994 (+)	111	AGCCTTTGGTAGTTCATGAGCATGATGATTGGGTGTTCACGCATGGGGGTGAGATGTGCCGCCTTCAAACCTTGTTACAATGTACAATGTGAACGCATTACCTGTCTGACA	Ensembl	0.267621	0.0244024	0.998761	1.53526	1.26764	1.45759	1.26348	2.12593	1.34679	1.43422	1.60631	1.88911	1.5163	1.34478	1.36806	1.47701	1.74331
																						MI0003667_st	20535402	MI0003667_st	MI0003667	hsa-mir-652	stem-loop	Homo sapiens	chrX:109298557-109298654 (+)	98	ACGAAUGGCUAUGCACUGCACAACCCUAGGAGAGGGUGCCAUUCACAUAGACUAUAAUUGAAUGGCGCCACUAGGGUUGUGCAGUGCACAACCUACAC	miRBase	0.271546	0.00237836	0.587742	3.14341	2.87186	3.16846	3.22578	3.11126	3.31504	2.98278	3.05835	3.25374	3.37355	3.19112	2.75397	2.84436	3.2421
																						ENSG00000200075_st	20532777	ENSG00000200075_st	ENSG00000200075	ENSG00000200075	snoRNA	Homo sapiens	chr8:130880836-130880962 (-)	127	AGGATATATCAAAGAGACTTTCTGGGGCTGGGAAACCAGGATCTCGTAATGCTATGACCAAAGATTGAAGTTTTGCATAGGATACCGTAGTCACTCAGTAGTGCTGTTTTCCTGAGGAAATACAAGA	Ensembl	0.274319	0.0210157	0.998761	2.67931	2.40499	2.73289	2.68441	2.92513	2.70168	2.70504	2.12202	2.32152	2.64377	3.08869	2.86792	2.50846	2.75964
																						MI0003616_x_st	20535350	MI0003616_x_st	MI0003616	hsa-mir-603	stem-loop	Homo sapiens	chr10:24564614-24564710 (+)	97	GAUUGAUGCUGUUGGUUUGGUGCAAAAGUAAUUGCAGUGCUUCCCAUUUAAAAGUAAUGGCACACACUGCAAUUACUUUUGCUCCAACUUAAUACUU	miRBase	0.277611	0.0167515	0.99101	1.50755	1.22994	1.38055	1.46176	1.79451	1.36361	1.41112	1.507	1.8921	1.07992	1.54198	1.64297	1.29249	1.02512
																						MIMAT0016920_st	20517749	MIMAT0016920_st	MIMAT0016920	hsa-miR-4289	miRNA	Homo sapiens	chr9:91360792-91360810 (-)	19	GCAUUGUGCAGGGCUAUCA	miRBase	0.281793	0.0325747	0.998761	1.6448	1.36301	0.802885	1.8332	1.61685	1.39093	1.81145	1.76946	1.70898	1.66988	1.92467	1.91973	1.12332	1.37119
																						MI0014176_st	20536243	MI0014176_st	MI0014176	hsa-mir-3149	stem-loop	Homo sapiens	chr8:77879004-77879086 (-)	83	AUACAUACAUGUACACACACAUGUCAUCCACACACAUACAUAUAUAUAUGUUUGUAUGGAUAUGUGUGUGUAUGUGUGUGUAU	miRBase	0.290131	0.0190922	0.998761	1.40714	1.11701	1.14931	2.03573	1.48293	1.10712	1.17744	1.46831	1.58914	1.28001	0.90746	1.87397	0.858878	1.06354
																						MIMAT0011160_st	20511560	MIMAT0011160_st	MIMAT0011160	hsa-miR-2116-5p	miRNA	Homo sapiens	chr15:59463428-59463448 (-)	21	GGUUCUUAGCAUAGGAGGUCU	miRBase	0.290458	0.0156289	0.974499	1.44643	1.15597	1.38978	0.863252	1.43029	1.12893	1.69513	1.59489	2.03498	1.41957	1.37454	1.53291	0.959621	1.14644
																						ENSG00000207503_st	20533018	ENSG00000207503_st	ENSG00000207503	ENSG00000207503	snoRNA	Homo sapiens	chr21:42911133-42911253 (+)	121	TGGTTGTTACCAAGGCATTTAGCATGCAATTTCTCATTTGCTGTGGACACGACGAGAAGAGAATTCCTCACTCGGTTTTCTGTCTGCCACCTTGCTAGCGATCAGCCCACTGGGAACATTT	Ensembl	0.292731	0.0145025	0.949663	2.35901	2.06628	2.52198	2.20206	3.02747	2.61109	2.49001	1.98638	2.55602	2.10696	2.13748	1.95066	2.27389	2.03216
																						MIMAT0022470_st	20522013	MIMAT0022470_st	MIMAT0022470	hsa-miR-5682	miRNA	Homo sapiens	chr3:120768531-120768552 (+)	22	GUAGCACCUUGCAGGAUAAGGU	miRBase	0.293463	0.00873243	0.84124	1.4037	1.11023	1.41023	1.31535	1.47957	1.22815	1.35992	1.0903	1.92048	1.72119	1.00643	1.50532	0.861405	1.13209
																						MIMAT0021023_st	20520200	MIMAT0021023_st	MIMAT0021023	hsa-miR-5002-5p	miRNA	Homo sapiens	chr3:123851796-123851819 (+)	24	AAUUUGGUUUCUGAGGCACUUAGU	miRBase	0.304275	0.0390901	0.998761	1.635	1.33073	1.6488	1.34078	2.1345	2.06413	1.67622	1.45949	1.79562	1.5751	1.39605	1.25932	1.98431	1.53147
																						MIMAT0019840_st	20519561	MIMAT0019840_st	MIMAT0019840	hsa-miR-451b	miRNA	Homo sapiens	chr17:27188395-27188416 (+)	22	UAGCAAGAGAACCAUUACCAUU	miRBase	0.30964	0.00706713	0.794878	1.83197	1.52233	2.22106	1.73785	1.43606	1.93759	1.82401	1.39562	1.54374	2.31602	1.98455	1.92315	1.54288	1.37791
																						MIMAT0015089_st	20515649	MIMAT0015089_st	MIMAT0015089	hsa-miR-3202	miRNA	Homo sapiens	chrX:153246556-153246577 (+) /// chrX:153246599-153246620 (-)	22	UGGAAGGGAGAAGAGCUUUAAU	miRBase	0.323917	0.0110019	0.876409	1.8658	1.54188	1.43502	1.61661	1.87372	2.1558	1.87829	1.7173	1.92626	2.35778	1.84452	1.85265	1.14038	1.48908
																						MI0000266_st	20534511	MI0000266_st	MI0000266	hsa-mir-10a	stem-loop	Homo sapiens	chr17:46657200-46657309 (-)	110	GAUCUGUCUGUCUUCUGUAUAUACCCUGUAGAUCCGAAUUUGUGUAAGGAAUUUUGUGGUCACAAAUUCGUAUCUAGGGGAAUAUGUAGUUGACAUAAACACUCCGCUCU	miRBase	0.324809	0.00880837	0.84124	1.5379	1.21309	1.27396	2.13025	2.12939	1.39511	1.58975	1.20583	1.65881	1.44364	1.32741	1.22485	1.11328	1.20393
																						MIMAT0003299_st	20504381	MIMAT0003299_st	MIMAT0003299	hsa-miR-630	miRNA	Homo sapiens	chr15:72879618-72879639 (+)	22	AGUAUUCUGUACCAGGGAAGGU	miRBase	0.334905	0.00770991	0.829274	1.47847	1.14357	1.33206	1.74696	1.80643	1.57224	1.52977	1.25237	1.31284	1.78633	1.4935	0.952247	0.993523	1.37414
																						U77_st	20538250	U77_st	U77	U77	CDBox	Homo sapiens	chr1:173835439-173835508 (-)	70	AGATACTATGATGGTTGCATAGTTCAGCAGATTTAATCATGAAGAGATGTACTATCTGTCTGATGTATCT	snoRNABase	0.336622	0.0395713	0.998761	2.6462	2.30957	2.17803	2.4235	2.36524	2.21737	2.90745	2.84801	2.64244	2.89289	2.80913	3.17792	1.64648	2.59025
																						MIMAT0019032_st	20518892	MIMAT0019032_st	MIMAT0019032	hsa-miR-4497	miRNA	Homo sapiens	chr12:110271155-110271171 (+)	17	CUCCGGGACGGCUGGGC	miRBase	0.344336	0.0253554	0.998761	12.2045	11.8602	12.0376	11.8106	12.6012	12.7707	11.9663	12.4997	11.2681	12.5057	12.282	12.3033	12.1181	11.926
																						ENSG00000239045_st	20533686	ENSG00000239045_st	ENSG00000239045	ENSG00000239045	snoRNA	Homo sapiens	chr7:151765985-151766090 (-)	106	ATTCTTTTGTAGTTCATAAGTGTGGTGACTGGGTTTTCATGTGCTTGTGGGAAATATGCCTCCCTCAAATCTTATTACGAAGTCAGCCCATTTTACTTGTCTGACA	Ensembl	0.36305	0.0310216	0.998761	2.29761	1.93456	2.84193	2.43598	2.61787	1.97943	1.77804	1.71767	2.61861	2.23642	2.46208	2.28809	2.2287	2.0136
																						MIMAT0027620_st	20525681	MIMAT0027620_st	MIMAT0027620	hsa-miR-6769b-5p	miRNA	Homo sapiens	chr1:206648151-206648173 (+)	23	UGGUGGGUGGGGAGGAGAAGUGC	miRBase	0.384228	0.0485006	0.99939	6.925	6.54077	7.32161	6.23825	7.09318	8.16186	6.42086	7.20376	6.59557	6.86184	6.67741	6.6757	6.94111	6.19655
																						ENSG00000238581_x_st	20533389	ENSG00000238581_x_st	ENSG00000238581	ENSG00000238581	snoRNA	Homo sapiens	chr21:39559551-39559656 (-)	106	ATCCTTTTGTAGTTCATAAGCGTGATGCTTGGGTGTTCACATGTGCATGTGTGAGATGTGCCTTCCTCAAACCTTGTTACAATGTGGGCACATTACCCGTCCAACA	Ensembl	0.407564	0.0175947	0.996998	3.61605	3.20849	3.75242	4.37762	3.88461	2.95164	3.67022	3.28394	3.64509	3.69883	3.12679	3.76936	2.82967	2.58472
																						MIMAT0004901_st	20505738	MIMAT0004901_st	MIMAT0004901	hsa-miR-298	miRNA	Homo sapiens	chr20:57393335-57393358 (-)	24	AGCAGAAGCAGGGAGGUUCUCCCA	miRBase	0.40966	0.048232	0.99939	3.03627	2.62661	3.14131	3.11943	2.6555	3.82921	2.38333	3.34075	2.11411	2.98798	3.33784	3.45328	2.29095	3.06827
																						MI0003140_s_st	20535155	MI0003140_s_st	MI0003140	hsa-mir-512-1	stem-loop	Homo sapiens	chr19:54169933-54170016 (+)	84	UCUCAGUCUGUGGCACUCAGCCUUGAGGGCACUUUCUGGUGCCAGAAUGAAAGUGCUGUCAUAGCUGAGGUCCAAUGACUGAGG	miRBase	0.415131	0.0290053	0.998761	2.23085	1.81572	1.95034	2.23551	3.78085	2.31312	1.74716	1.98097	1.99438	2.45266	1.90646	1.94706	1.91146	1.56634
																						MI0003141_s_st	20535156	MI0003141_s_st	MI0003141	hsa-mir-512-2	stem-loop	Homo sapiens	chr19:54172411-54172508 (+)	98	GGUACUUCUCAGUCUGUGGCACUCAGCCUUGAGGGCACUUUCUGGUGCCAGAAUGAAAGUGCUGUCAUAGCUGAGGUCCAAUGACUGAGGCGAGCACC	miRBase	0.415131	0.0290053	0.998761	2.23085	1.81572	1.95034	2.23551	3.78085	2.31312	1.74716	1.98097	1.99438	2.45266	1.90646	1.94706	1.91146	1.56634
																						MIMAT0015212_st	20503109	MIMAT0015212_st	MIMAT0015212	kshv-miR-K12-10a-5p	miRNA	Kaposi sarcoma-associated herpesvirus	KSU75698:118010-118031 (-)	22	GGCUUGGGGCGAUACCACCACU	miRBase	0.435776	0.038349	0.998761	2.27132	1.83554	1.28248	1.89334	2.2906	2.82669	1.75052	2.90455	1.7101	2.61002	2.28972	3.15519	1.62284	2.11214
																						MIMAT0027686_st	20525747	MIMAT0027686_st	MIMAT0027686	hsa-miR-6893-5p	miRNA	Homo sapiens	chr8:145660977-145660997 (-)	21	CAGGCAGGUGUAGGGUGGAGC	miRBase	0.653935	0.0470722	0.99939	6.26466	5.61073	7.44996	5.37575	7.04385	7.67427	5.09429	6.10843	4.54385	6.62462	6.4839	6.24772	6.54919	5.71081
																						MIMAT0004597_st	20500746	MIMAT0004597_st	MIMAT0004597	hsa-miR-140-3p	miRNA	Homo sapiens	chr16:69967045-69967065 (+)	21	UACCACAGGGUAGAACCACGG	miRBase	0.737637	0.0333227	0.998761	8.52089	7.78325	8.2777	9.46646	8.35405	6.78037	8.65185	8.84111	8.63247	8.52247	8.80229	8.88011	6.61078	8.43554
																						MI0014187_st	20536259	MI0014187_st	MI0014187	hsa-mir-3158-2	stem-loop	Homo sapiens	chr10:103361174-103361254 (-)	81	AUUCAGGCCGGUCCUGCAGAGAGGAAGCCCUUCCAAUACCUGUAAGCAGAAGGGCUUCCUCUCUGCAGGACCGGCCUGAAU	miRBase	0.821336	0.0397129	0.998761	3.71132	2.88999	5.51905	2.92918	4.48082	5.22497	2.15982	4.44769	2.21394	3.26906	3.52649	3.34224	3.8322	2.68624
																										en rojo, target to RNF2 conserved site
[truncated: 10 more columns]

## Sheet: Color_range
	-4
	-3.8
	-3.6
	-3.4
	-3.2
	-3
	-2.8
	-2.6
	-2.4
	-2.2
	-2
	-1.8
	-1.6
	-1.4
	-1.2
	-1
	-0.8
	-0.6
	-0.4
	-0.2
	0
	0.2
	0.4
	0.6
	0.8
	1
	1.2
	1.4
	1.6
	1.8
	2
	2.2
	2.4
	2.6
	2.8
	3
	3.2
	3.4
	3.6
	3.8
	4
