# Supplementary material for: Loss of dyskerin facilitates the acquisition of metastatic traits by altering the mevalonate pathway
Source: Life Sci Alliance. 2023 Feb 2;6(4):e202201692. doi: 10.26508/lsa.202201692 (PMC9899484; doi:10.26508/lsa.202201692)
Supplement: Supplementary file 2 [file LSA-2022-01692_TableS2.xlsx]

## Sheet: UP regulated transcripts
677 elements included exclusively in "up transcripts UT-SCC12A siDKC1":
AADAC
ABCA13
ABCB7
ABCC3
ABCF2
ABHD17C
ACAT2
ACOT7
ACP1
ACTR6
ADA
ADAM8
ADGRF4
ADHFE1
AFAP1L1
AGR2
AHCYL1
AJAP1
AK1
AKR1C1
ALDH1L2
ALDH3B1
ALDOC
ALOXE3
ANKRD42
ANO6
ANXA10
AP3S1
APBB2
APIP
APOA1BP
APOPT1
ARF4
ARFIP1
ARG2
ARHGAP18
ARHGAP6
ARHGEF4
ARL2-SNX15
ARL4D
ARL5B
ARMT1
ARPC1A
ASIC1
ASNS
ASS1
ATF4
ATMIN
ATP2C2
ATP5EP2
ATP5O
ATP6V1G1
ATPAF1
B3GNT5
BANF1
BASP1
BBOF1
BBS10
BCAT1
BCKDK
BCL10
BCL2A1
BIRC3
BLCAP
BLVRA
BNIP3
BRK1
BTBD1
C10orf55
C11orf49
C11orf70
C16orf87
C19orf54
C1D
C1orf116
C1orf198
C1QTNF6
C3orf52
C4orf3
C4orf36
C5orf51
C7orf60
CALM3
CAMTA1
CANT1
CAPRIN2
CARM1
CASP3
CCDC109B
CCDC113
CCDC155
CCDC25
CCDC6
CCDC92
CCL20
CCND2
CCNDBP1
CCNG2
CCNJL
CCNY
CD22
CDA
CDH4
CDK2AP1
CDK2AP2
CDKN2AIPNL
CDYL
CERK
CETN2
CFAP54
CFAP57
CFAP69
CFL2
CHAC1
CHCHD4
CHRM3
CIART
CIB1
CITED4
CLCN6
CLDN16
CLIC3
CLUAP1
CNN2
CNN3
COL5A1
COMMD8
COPA
COPB1
COPB2
COPS4
COPS7A
COPS8
COQ10B
COTL1
COX7A2L
CPA4
CPNE2
CRBN
CREB3L1
CRTAP
CSF3
CST1
CTBP2
CTNNBIP1
CUL1
CXCL1
CXCL17
CXCL2
CXCL3
CYB5B
CYP27B1
CYP4F11
CYP4V2
CYSTM1
DAP
DCUN1D1
DDAH1
DDHD2
DDX54
DENND6B
DGUOK
DHRS13
DHX40
DIABLO
DLK2
DMTN
DNAJB6
DNAJB9
DNAJC25-GNG10
DNAJC8
DNAL4
DOK4
DPCD
DPH3
DPM1
DUSP10
DUSP14
DUSP5
DUSP6
DUSP9
DYNLRB1
DYNLT1
DYRK2
E2F5
EEFSEC
EFCAB2
EFTUD1
EHD1
EHD3
EID1
EIF4EBP1
ELP5
ENTPD3
EOGT
EPB41L5
ERO1B
ETV1
EVI5
F8A2
F8A3
FA2H
FABP5
FADS2
FAM101B
FAM105A
FAM107B
FAM127A
FAM127B
FAM153A
FAM167A
FAM60A
FBP1
FBXL3
FBXO17
FBXO21
FBXO25
FBXO27
FBXO3
FBXO36
FBXO7
FBXO8
FDFT1
FDPS
FDX1
FECH
FERMT2
FEZ1
FEZ2
FHDC1
FHL1
FHL3
FKBP1A
FLI1
FLOT1
FLOT2
FNBP1L
FOXP4
FTSJ1
FUOM
FUZ
GABARAP
GABARAPL2
GABPB1
GARS
GATAD2A
GBAS
GCH1
GCKR
GCLC
GCLM
GCSH
GDAP1
GJB4
GLO1
GLRX2
GLUL
GNA12
GNG10
GNG4
GNPNAT1
GPI
GPN1
GPN2
GPR158
GPS2
GRAMD1B
GRHL3
GRK5
GSKIP
GSTM4
GTF2B
GTF3A
H3F3B
HACD2
HADH
HAS2
HDDC2
HEBP1
HECTD3
HEPHL1
HHEX
HIBADH
HID1
HMGCL
HMGCR
HORMAD1
HS3ST3A1
HSF1
HSPB8
IDH2
IFNE
IFT20
IFT22
IFT88
IGFBP4
IL1R2
IL20RB
IL24
IL2RG
IL31RA
IL32
IL36G
IL6
ILK
IPMK
IQCG
IQCK
IRAK1BP1
IRAK2
ISCU
ISY1
ITGB2
ITPK1
JDP2
JMJD8
KAT8
KCNIP3
KCTD1
KDM1B
KDSR
KIAA0930
KIAA1033
KIF9
KLF11
KLHL2
KLHL4
KLHL41
KMT5B
KRT34
KRT81
KRT85
KRTCAP2
LAPTM5
LCK
LCP1
LEMD1
LEPR
LGALS3
LIMS1
LINC01219
LITAF
LONRF3
LOX
LRIF1
LRRC40
LRRC41
LUZP6
LYRM1
LZTFL1
MAGED1
MAGED2
MAL
MALSU1
MAN2A1
MAOA
MAP1LC3B
MAP4K2
MAP7
MAPK15
MAPK3
MED8
MEF2D
METTL5
MFI2
MGLL
MIR22HG
MLF1
MMAB
MME
MMP10
MOB1A
MOB3A
MOCS2
MPV17
MREG
MRPL21
MRPL48
MRPL49
MRPL50
MSC
MSMO1
MSRB2
MVD
MXD4
MXRA7
MYCBP
MYD88
MYEOV
MYO5A
MZT1
N4BP1
NAA20
NAT10
NCF1
NCK2
NDRG2
NDUFAF1
NDUFB5
NFIX
NFKB1
NID1
NIPAL1
NIPAL4
NLRP3
NME4
NOG
NOL4L
NQO1
NRAS
NRBP1
NT5DC1
NUS1
NXN
NXT2
OAF
OAZ1
ODC1
OGFRL1
OR11A1
ORC4
OSBP2
OSCP1
PACS2
PAFAH1B2
PAIP2
PBDC1
PCBD1
PCCB
PCNXL4
PDCD2L
PDCD4
PDE4D
PDE9A
PDHB
PDLIM1
PEG10
PEPD
PFDN1
PGAM1
PGAM4
PGD
PGK1
PGLYRP3
PGM1
PHC2
PHF19
PHGDH
PHYKPL
PI3
PIK3R1
PIM2
PITPNC1
PKD2
PLA2G16
PLAGL1
PLEKHA1
PLPP5
PLRG1
PLS1
PLTP
PM20D2
PNPLA8
PNRC1
POLD2
POLR2E
POPDC3
PPARD
PPIL6
PPP2R5A
PPP2R5C
PRDM1
PRDX3
PRKACB
PRKAR1A
PROSER2
PRRG1
PTHLH
PTP4A1
PTPN9
PTPRR
PTRHD1
PTX3
PUDP
PVRL2
PXDN
R3HDM4
RAB15
RAB25
RAB31
RAB8B
RAC2
RBM38
RBM47
RCAN3
RCBTB1
REXO2
RFX5
RGS2
RGS20
RHOD
RHOF
RIN3
RIT1
RNF11
RNF141
RNF144B
RNF19B
RNF2
RNLS
ROPN1L
RPIA
RPL3
RPS6KA3
RRM2
RRM2B
RSL24D1
RTF1
RWDD2B
S100A9
SARS
SAV1
SCEL
SDC1
SDC3
SDCBP2
SEC14L1
SEC23A
SECISBP2L
SEH1L
SELT
SEMA4A
SEMA4G
SEMA7A
SENP2
SEPT6
SEPT9
SERP1
SFRP1
SGK1
SH2D2A
SH3BGRL2
SH3GL1
SIAH2
SIRT1
SKP2
SLAMF9
SLC19A2
SLC25A43
SLC2A9
SLC30A9
SLC35A1
SLC39A10
SLC43A1
SLC5A3
SMAP1
SMARCA1
SMOC1
SNRPD3
SNRPN
SNU13
SNX15
SNX2
SNX6
SNX7
SOCS1
SORBS3
SORCS2
SPA17
SPATA2
SPATS2
SPRR2A
SPRR3
SPRY4
SPTLC3
SRA1
STARD10
STC1
STK17A
STK40
STOM
STRADB
STRAP
STX7
STXBP1
STYX
SUMO1
SURF1
SYNGR1
SYT16
TAF10
TAF13
TBC1D13
TBC1D14
TBCA
TBL1X
TCAIM
TCEAL8
TCEB1
TCP11L2
TCTN2
TEX261
TFB2M
TFPI
THAP1
THSD4
TIMMDC1
TMA7
TMCC3
TMEM167A
TMEM183A
TMEM216
TMEM230
TMEM64
TMEM67
TMPRSS11E
TNFRSF11B
TNFRSF9
TNFSF15
TOM1L1
TOP2B
TPK1
TPRG1L
TPST1
TRAF3IP1
TRAPPC1
TRIB3
TRIM16L
TRIOBP
TRMT112
TSC22D1
TSR3
TTC7B
TWF1
TWIST2
TXK
TXNIP
TXNL4A
UBA2
UBE2A
UBE2Q2
UBL3
UBL7
UBQLN2
UCHL3
USP28
VAC14
VAMP7
VGLL1
VPS11
VPS37B
VSIG1
VTA1
VWA5A
WBP2
WDR45
WDR66
WRNIP1
WSB1
WWC1
WWP1
XBP1
YAF2
YPEL3
YPEL5
YY1
ZBED2
ZC3H12A
ZDHHC20
ZER1
ZFP36L1
ZFP42
ZIC2
ZNF185
ZNF280C
ZNF529-AS1
ZNHIT6

## Sheet: UP regulated proteins
480 elements included exclusively in "up proteins UT-SCC12A siDKC1":
AACS
ACACA
ACADVL
ACLY
ACOT9
ACSL3
ACTN4
ADK
ADSL
AFAP1L2
AKR1B1
AKR1B10
ALDH7A1
ALDH9A1
ANAPC7
ANXA13
ANXA2
ANXA3
AP2A1
APEH
APP
ARAP1
ARFGAP1
ARHGAP1
ARHGEF2
ARHGEF7
ATAD3A
ATL3
ATP2B4
B2M
BAIAP2
BSG
C11orf68
C6orf132
CAD
CALD1
CAP1
CAPG
CCDC9B
CD44
CD59
CDC16
CDCP1
CDH3
CERT
CHMP7
CHORDC1
COL17A1
COPS2
COPS6
CORO1C
COX6B1
CPNE1
CSE1L
CSRP2
CTNND1
CTSL
CTTN
CYCS
DARS
DBF4B
DBNL
DCTN1
DDX17
DDX46
DFFA
DHPS
DHRS9
DIS3L2
DLD
DNM1L
ECPAS
EGFR
EIF3B
EIF3E
EIF4A1
EIF4G2
EIF5
EIF6
ELP3
EPHA2
EPS8L2
EREG
ERGIC1
ERO1A
ERP44
EWSR1
EXOSC1
EXOSC8
F11R
FBLIM1
FDXR
FERMT1
FLNA
FLNB
FLNC
FOSL1
FST
FTH1
FTL
GALE
GART
GBF1
GDPD3
GEMIN4
GJB3
GLG1
GPS1
GSDME
HIP1R
HLA-A
HLA-C
HNRNPA3
HNRNPD
HNRNPH3
HSPA5
HSPA9
HYOU1
IARS2
IDE
IGF2BP2
IGFBP7
IL1B
IMUP
INF2
INPP4B
IPO4
IQGAP1
ITGA2
ITGA3
ITGA6
ITGB1
ITGB4
JPT2
KARS
KCTD12
KLC3
KRT8
LAMA3
LAMB1
LAMB3
LAMC1
LAMC2
LARS
LCMT1
LDHA
LDLR
LIMA1
LIMD1
LLGL1
LONP1
LRPAP1
LRPPRC
LRRFIP1
LYPD3
MACROD1
MAP1LC3B2
MAP2K1
MAP7D1
MAPK1
MARS
MEAK7
MFSD10
MRPL13
MRPS28
MSN
MTAP
MTX1
MVP
MYH9
MYL6
MYO1C
MYOF
NCEH1
NDRG1
NECAP2
NIBAN2
NIT1
NIT2
NRG1
NSUN2
NT5E
NUP35
NXF1
OCIAD2
OGDH
OGT
OLA1
OR1M1
OXSR1
PC
PCYT1A
PDCD6IP
PDLIM4
PDLIM7
PEX19
PGLS
PGM3
PITRM1
PLCB3
PLXNB2
PMM2
PMPCB
PNPT1
PPFIA1
PPP1R13L
PPP4R1
PPP6R3
PRDX6
PRKAA1
PRKAB1
PRKDC
PRKRA
PRMT1
PSMC2
PSMC3
PSMC5
PSMC6
PSMD13
PSME4
PTBP3
PTGS2
PTPN12
PUM1
PWP1
PXN
PYGB
PYGL
QARS
QTRT1
RAB32
RABGAP1
RAI14
RETSAT
RHOB
RNF149
RPL10
RPL36AL
RPL7L1
RPL9
RPL9P7
RPL9P8
RPL9P9
RRP1
RRP12
RRP15
RTKN
RTTN
SARG
SCFD1
SCRIB
SCYL1
SDAD1
SDCBP
SEC62
SERPINB5
SERPINH1
SFN
SFPQ
SFXN1
SH3KBP1
SLC25A10
SLC25A3
SLC27A4
SLC38A2
SLFN5
SLK
SMAP
SMCHD1
SNAP23
SND1
SNX1
SNX12
SNX18
SORD
SOWAHC
SPATS2L
SQOR
SQSTM1
SRP72
SRPK1
SRRT
STK10
STUB1
STX12
TAP1
TCEA1
TES
TGM2
TINAGL1
TJP1
TMEM126A
TMEM40
TMEM80
TMX2
TOR1AIP2
TPM1
TRIP10
TRMT1
TSG101
TSR1
TSTA3
TTC37
TUBB2A
TUBB6
TUFM
TUT7
TXNRD1
TYMP
UBA5
UBA6
UBAP2
UGDH
UPP1
UQCRC2
URB2
VARS
VASP
VCP
VPS45
VSNL1
WASH6P
WASHC2A
WFDC2
XRN2
ZBTB25
ABCA11P
ACBD5
ACY1
ADAM17
ADD3
ADPGK
ALG13
AMPD3
AP2S1
AREG
ARFGEF3
ARHGAP5
ARMC8
ASPM
AXL
C12orf73
C3orf33
C8orf82
CCDC50
CCDC88C
CD40
CDC42BPB
CDK5RAP1
CEMIP2
CHPF
CLSTN1
CMC2
COL25A1
COL7A1
CPLANE1
CRYAB
CTH
CTTNBP2NL
CXCL8
CXorf58
DHRS4
DVL1
EFCAB11
EHBP1
EIF2D
ELP2
ENPP7
EPN2
FADS3
FAM114A2
FBH1
FHOD1
FKBP9
GAK
GFER
GIT2
GLYR1
GTF2H2
GTPBP2
GTPBP6
GYS1
HARS2
HYDIN
ICAM1
INHBA
ISG20
ISG20L2
ITPR2
JSRP1
JUND
KIFAP3
KYNU
LARP6
LIPH
LRRIQ1
MANSC1
MAPK13
MAPK9
MBTPS2
METTL2B
MICAL2
MINK1
MIPEP
MIPOL1
MNAT1
MTA3
MUC4
NAA35
NCAPD3
NEK9
NT5C3B
OBSCN
OCEL1
OPTN
OSMR
OTUB2
OTUD4
PHF23
PHLDB2
PIN4
PNKP
POLD4
POP7
PPM1F
PROCA1
PRUNE2
PTPRE
QRSL1
RAB34
RETREG3
RILPL1
RIMBP3C
RPP30
RPS27L
SCNN1G
SEC14L2
SELENOS
SENP1
SERPINA13P
SFT2D2
SHFL
SHKBP1
SIN3B
SLC12A7
SLC25A32
SLC29A2
SLC4A2
SLC4A7
SLPI
STAT2
STAU2
STX18
TAOK1
TCIRG1
TIMP2
TMEM154
TNFRSF10A
TNNC1
TRIM5
TRIM64
TSSK3
TTC19
TTF2
TUBGCP5
UBE2Q1
UBN1
UNC45B
VPS50
WASHC5
WNK1
WNT1
XAB2
XDH
ZC3H7A
ZDHHC2
ZFC3H1
ZNF136
ZNF783
ZNRF2

## Sheet: UP transcripts & proteins
82 common elements in "up transcripts and proteins UT-SCC12A siDKC1":
ACAT1
ACSS2
ADSS
AK4
ALDH2
ANXA1
ANXA4
ANXA5
ARL1
BCAT2
BCL2L1
BICD2
CALB2
CAP2
CARS
CASP4
CDKN1A
CXADR
DBN1
DPYSL3
EIF2B2
F3
FAM83A
FRMD6
GCC2
GFM1
GFPT1
GMFB
GSTO1
HADHB
HBEGF
HMGA1
HMGA2
HMGCS1
IDI1
IL1A
IL1RN
LYPLA1
MARCKSL1
MCCC2
ME1
MGAT1
MLEC
MOSPD2
NAGK
NAMPT
NAPRT
NEK7
NUP210
OSBPL9
OSTF1
PFKFB2
PLAU
PLEK2
PLS3
PPIF
PPP1R12A
PPP1R2
PSAT1
PSMG1
PTER
RALA
RBBP9
RECQL
RNASE7
S100A11
SEC31A
SEC61B
SERPINB1
SERPINB2
SHMT2
SMYD2
TALDO1
TGFA
TNIP1
U2AF1
UAP1
UBLCP1
UFM1
UFSP2
YBX3
ZFAND1
